# Supplementary material for: Neisseria gonorrhoeae MlaA influences gonococcal virulence and membrane vesicle production
Source: PLoS Pathog. 2019 Mar 7;15(3):e1007385. doi: 10.1371/journal.ppat.1007385 (PMC6424457; doi:10.1371/journal.ppat.1007385)
Supplement: S3 File — (XLSX) [file ppat.1007385.s011.xlsx]

## Sheet: ProteomeDiscoverer output
Accession	Description	Score	Coverage	# Proteins	# Unique Peptides	# Peptides	# PSMs	129/128	129/128 Count	129/128 Variability [%]	130/128	130/128 Count	130/128 Variability [%]	131/128	131/128 Count	131/128 Variability [%]	Area	# AAs	MW [kDa]	calc. pI
Q5FAG7	Pilus assembly protein OS=Neisseria gonorrhoeae (strain ATCC 700825 / FA 1090) GN=NGO_0055 PE=4 SV=2 - [Q5FAG7_NEIG1]	602.203	57.87	2	69	69	236	1.00062	195	15.2008	1.83114	195	16.4309	2.25926	195	24.0869	1.86657e+09	1004	110.223	9.17334
Q5F6Q4	Ligand-gated channel OS=Neisseria gonorrhoeae (strain ATCC 700825 / FA 1090) GN=NGO_1495 PE=3 SV=1 - [Q5F6Q4_NEIG1]	344.64	60.09	1	63	63	140	1.04635	134	16.7605	2.21683	134	29.8774	1.82469	134	34.3988	1.11331e+09	912	101.882	9.36377
Q5F5W8	Outer membrane protein assembly factor BamA OS=Neisseria gonorrhoeae (strain ATCC 700825 / FA 1090) GN=bamA PE=1 SV=1 - [Q5F5W8_NEIG1]	598.179	66.92	1	60	60	264	1.27343	239	19.0206	1.99442	239	20.0864	2.14769	239	24.1547	4.24745e+09	792	87.8876	8.92432
Q5F6W5	Chaperone protein DnaK OS=Neisseria gonorrhoeae (strain ATCC 700825 / FA 1090) GN=dnaK PE=3 SV=1 - [DNAK_NEIG1]	407.706	72.59	1	58	58	148	0.95817	144	20.292	2.79873	145	38.958	2.71685	145	48.3596	1.15559e+09	642	68.8204	4.90674
Q5F531	Adhesin OS=Neisseria gonorrhoeae (strain ATCC 700825 / FA 1090) GN=NGO_2105 PE=4 SV=1 - [Q5F531_NEIG1]	287.208	40.87	1	54	55	122	0.836931	100	28.1631	1.55726	100	24.5035	1.14079	100	31.1999	1.47972e+09	1468	160.41	9.20264
Q5FAD2	Type IV pilus biogenesis and competence protein PilQ OS=Neisseria gonorrhoeae (strain ATCC 700825 / FA 1090) GN=pilQ PE=3 SV=1 - [PILQ_NEIG1]	923.157	75.93	1	55	55	457	1.77693	391	38.3219	1.40282	389	19.6622	1.85114	390	40.3439	1.18547e+10	723	77.9032	9.34912
Q5F933	Uncharacterized protein OS=Neisseria gonorrhoeae (strain ATCC 700825 / FA 1090) GN=NGO_0571 PE=4 SV=1 - [Q5F933_NEIG1]	409.207	56.19	1	54	54	150	1.25798	141	19.4194	2.01414	141	21.9029	2.56331	141	33.7792	1.8098e+09	598	65.9031	10.0229
Q5F5R6	DNA-directed RNA polymerase subunit beta' OS=Neisseria gonorrhoeae (strain ATCC 700825 / FA 1090) GN=rpoC PE=3 SV=1 - [RPOC_NEIG1]	211.319	41.77	1	52	52	89	0.906824	88	18.6018	1.79737	88	20.8408	1.43908	88	20.6659	2.82367e+08	1391	153.697	7.25439
Q5F932	Peptidase S41 OS=Neisseria gonorrhoeae (strain ATCC 700825 / FA 1090) GN=NGO_0572 PE=3 SV=1 - [Q5F932_NEIG1]	322.417	76.17	1	46	46	128	1.14982	125	19.7897	2.03432	125	23.2254	2.29888	125	30.97	1.72102e+09	491	52.7028	8.82178
Q5F541	60 kDa chaperonin OS=Neisseria gonorrhoeae (strain ATCC 700825 / FA 1090) GN=groL PE=3 SV=1 - [CH60_NEIG1]	809.928	75.92	1	44	44	381	1.1158	350	20.66	1.75245	353	19.9831	1.04043	349	20.217	1.08731e+10	544	57.3148	5.03369
Q5F848	Uncharacterized protein OS=Neisseria gonorrhoeae (strain ATCC 700825 / FA 1090) GN=NGO_0948 PE=4 SV=2 - [Q5F848_NEIG1]	610.016	74.93	1	41	41	261	1.44512	226	26.7718	1.88069	225	21.8831	2.02443	226	31.0272	9.18123e+09	375	41.3116	8.86572
Q5F845	TonB-dependent receptor OS=Neisseria gonorrhoeae (strain ATCC 700825 / FA 1090) GN=NGO_0952 PE=3 SV=1 - [Q5F845_NEIG1]	161.996	47.51	1	40	40	67	1.27524	59	20.1315	1.79758	59	17.9922	1.97426	59	35.3732	2.72936e+08	922	104.1	9.36377
Q5F5R5	DNA-directed RNA polymerase subunit beta OS=Neisseria gonorrhoeae (strain ATCC 700825 / FA 1090) GN=rpoB PE=3 SV=1 - [RPOB_NEIG1]	143.502	33.84	1	38	39	59	0.932143	48	14.0826	2.05961	49	32.149	1.68558	49	35.8345	1.57118e+08	1392	155.652	5.52881
Q5FAF4	Opacity protein opA54 OS=Neisseria gonorrhoeae (strain ATCC 700825 / FA 1090) GN=NGO_0070 PE=4 SV=2 - [Q5FAF4_NEIG1]	806.049	81.06	1	12	39	427	1.914	160	35.7036	2.60421	160	47.9059	2.23226	160	60.4387	3.96356e+10	227	25.6769	9.5249
Q5F7C4	Alanine--tRNA ligase OS=Neisseria gonorrhoeae (strain ATCC 700825 / FA 1090) GN=alaS PE=3 SV=1 - [SYA_NEIG1]	168.83	46.45	1	38	38	66	0.849936	66	24.7755	2.76119	66	43.8744	2.4183	66	53.9675	1.02121e+09	874	95.8673	5.61768
Q5F939	Pyruvate dehydrogenase E1 component OS=Neisseria gonorrhoeae (strain ATCC 700825 / FA 1090) GN=aceE PE=4 SV=1 - [Q5F939_NEIG1]	286.552	44.53	1	38	38	108	0.941587	105	19.8792	1.9749	105	28.4658	0.962446	105	20.3415	8.18801e+08	887	99.5307	5.79541
Q5F5P4	Peptidoglycan-binding protein LysM OS=Neisseria gonorrhoeae (strain ATCC 700825 / FA 1090) GN=NGO_1873 PE=4 SV=2 - [Q5F5P4_NEIG1]	461.437	81.33	1	37	37	239	1.89766	201	39.7559	1.50759	200	24.6866	2.1811	201	50.8312	5131047350	407	45.4194	7.04932
A0A0H4IS55	Opacity protein opA54 OS=Neisseria gonorrhoeae (strain ATCC 700825 / FA 1090) GN=NGO_04980 PE=4 SV=1 - [A0A0H4IS55_NEIG1]	586.402	82.76	1	23	35	327	4.38213	138	149.213	1.16037	136	22.785	6.00299	138	166.987	4.29451e+10	232	26.1771	9.70068
Q5F5V7	Membrane protein OS=Neisseria gonorrhoeae (strain ATCC 700825 / FA 1090) GN=NGO_1812 PE=3 SV=1 - [Q5F5V7_NEIG1]	2419.18	80.75	1	35	35	1367	1.45392	1212	25.7011	1.45106	1213	18.8789	0.837759	1193	20.5609	7.62146e+10	348	37.1645	8.76318
Q5F6A4	Peptidylprolyl isomerase OS=Neisseria gonorrhoeae (strain ATCC 700825 / FA 1090) GN=NGO_1656 PE=4 SV=1 - [Q5F6A4_NEIG1]	354.818	82.29	1	35	35	132	1.73043	129	25.4333	1.53583	129	16.2766	2.35183	129	33.3916	4.98903e+09	288	31.5087	9.12939
Q5F5S3	Elongation factor G OS=Neisseria gonorrhoeae (strain ATCC 700825 / FA 1090) GN=fusA PE=3 SV=1 - [EFG_NEIG1]	151.554	51.36	1	34	34	54	0.893954	51	21.9377	2.41556	51	42.1604	2.22642	51	33.9506	2.88844e+08	701	77.1241	5.17334
A0A0H4IV74	Opacity protein opA54 OS=Neisseria gonorrhoeae (strain ATCC 700825 / FA 1090) GN=NGO_05420 PE=4 SV=1 - [A0A0H4IV74_NEIG1]	395.816	83.19	1	4	33	209	1.24441	16	26.3744	1.58201	16	23.883	7.09047	16	54.4678	24425121054	226	25.5668	9.29053
Q5F905	30S ribosomal protein S1 OS=Neisseria gonorrhoeae (strain ATCC 700825 / FA 1090) GN=rpsA PE=3 SV=1 - [Q5F905_NEIG1]	321.278	51.69	1	33	33	121	0.866102	110	26.427	3.8901	111	39.7199	3.75292	111	54.9275	1.58962e+09	561	61.1529	5.07178
Q5F6Q3	Transferrin-binding protein 2 OS=Neisseria gonorrhoeae (strain ATCC 700825 / FA 1090) GN=NGO_1496 PE=4 SV=1 - [Q5F6Q3_NEIG1]	107.831	38.26	1	31	31	57	0.88696	51	15.9044	3.17241	51	26.9986	2.47149	51	31.7429	3.63315e+08	703	75.1987	6.12549
Q5F4Y7	Glycine--tRNA ligase beta subunit OS=Neisseria gonorrhoeae (strain ATCC 700825 / FA 1090) GN=glyS PE=3 SV=1 - [SYGB_NEIG1]	154.503	46.29	1	30	30	53	0.88953	50	18.7931	2.97175	50	33.3544	2.61935	50	34.2642	2.94478e+08	687	74.4053	5.75732
Q5F7W9	Chaperone protein ClpB OS=Neisseria gonorrhoeae (strain ATCC 700825 / FA 1090) GN=clpB PE=3 SV=1 - [Q5F7W9_NEIG1]	125.761	39.35	1	30	30	45	0.951754	43	23.9585	2.76505	43	42.8452	2.46196	43	42.5358	3.03451e+08	859	95.039	5.64307
A0A0H4J5N9	Opacity protein opA54 OS=Neisseria gonorrhoeae (strain ATCC 700825 / FA 1090) GN=NGO_06725 PE=4 SV=1 - [A0A0H4J5N9_NEIG1]	451.616	78.21	1	5	29	246	2.825	20	31.0987	2.05171	19	30.5342	1.45057	20	32.3874	3.35686e+10	234	26.5292	9.72998
Q5FA17	Iron ABC transporter substrate-binding protein OS=Neisseria gonorrhoeae (strain ATCC 700825 / FA 1090) GN=NGO_0217 PE=4 SV=1 - [Q5FA17_NEIG1]	444.121	64.35	1	29	29	179	1.02412	171	21.065	2.75892	171	30.5944	3.39368	172	36.6663	1.09227e+10	331	35.8181	9.59814
Q5FAH2	Carbamoyl-phosphate synthase (glutamine-hydrolyzing) OS=Neisseria gonorrhoeae (strain ATCC 700825 / FA 1090) GN=carB PE=3 SV=1 - [Q5FAH2_NEIG1]	116.178	30.81	1	29	29	48	0.900087	47	23.6931	2.13799	47	47.3009	2.31355	47	57.3827	1.97022e+08	1071	117.411	5.17334
Q5F726	Multidrug transporter OS=Neisseria gonorrhoeae (strain ATCC 700825 / FA 1090) GN=NGO_1363 PE=3 SV=1 - [Q5F726_NEIG1]	237.921	62.74	1	28	28	88	1.64373	84	34.4826	1.61067	84	21.5089	1.82406	84	34.5001	1.84945e+09	467	50.3824	9.17334
Q5F9Q7	Polyribonucleotide nucleotidyltransferase OS=Neisseria gonorrhoeae (strain ATCC 700825 / FA 1090) GN=pnp PE=3 SV=1 - [PNP_NEIG1]	122.202	46.25	1	28	28	51	1.06413	51	19.0394	2.62393	51	32.4932	1.92661	51	32.8856	5.12244e+08	707	76.4069	5.45264
Q5F9W2	Peptidase OS=Neisseria gonorrhoeae (strain ATCC 700825 / FA 1090) GN=NGO_0275 PE=4 SV=1 - [Q5F9W2_NEIG1]	127.604	20.03	1	26	27	51	1.05719	46	21.1353	1.36026	46	26.019	1.13774	46	17.7929	6.55353e+08	1593	175.807	9.27588
Q5F651	LPS-assembly protein LptD OS=Neisseria gonorrhoeae (strain ATCC 700825 / FA 1090) GN=lptD PE=3 SV=1 - [LPTD_NEIG1]	125.871	37.7	1	26	26	46	0.895509	42	13.9489	1.92409	42	22.405	1.54683	42	23.7071	3.78561e+08	801	87.4872	7.72314
Q5F797	Translation initiation factor IF-2 OS=Neisseria gonorrhoeae (strain ATCC 700825 / FA 1090) GN=infB PE=3 SV=1 - [IF2_NEIG1]	116.257	25.87	1	26	26	43	0.85935	40	18.1056	2.92106	40	38.0932	2.29087	40	39.8378	1.59284e+08	943	100.956	8.98291
Q5F863	5-methyltetrahydropteroyltriglutamate--homocysteine methyltransferase OS=Neisseria gonorrhoeae (strain ATCC 700825 / FA 1090) GN=metE PE=3 SV=1 - [METE_NEIG1]	130.333	34.56	1	26	26	41	0.838986	41	19.0081	2.1244	41	28.0447	1.94916	41	26.2914	2.30036e+08	758	84.9599	5.57959
Q5F4X9	GMP synthase [glutamine-hydrolyzing] OS=Neisseria gonorrhoeae (strain ATCC 700825 / FA 1090) GN=guaA PE=3 SV=1 - [GUAA_NEIG1]	83.512	42.42	1	24	24	34	0.822102	34	12.3017	2.3559	34	43.6866	2.21966	34	47.7062	1.80441e+08	521	57.5895	5.90967
Q5F915	Trigger factor OS=Neisseria gonorrhoeae (strain ATCC 700825 / FA 1090) GN=tig PE=3 SV=1 - [TIG_NEIG1]	117.891	57.21	1	24	24	48	0.937075	48	18.2972	2.8829	48	39.054	3.08075	48	40.4956	4.6109e+08	437	48.3378	4.90674
Q5F5Q8	Elongation factor Tu OS=Neisseria gonorrhoeae (strain ATCC 700825 / FA 1090) GN=tuf1 PE=3 SV=1 - [EFTU_NEIG1]	318.859	58.88	1	23	23	135	0.783034	124	24.5323	2.19885	125	27.3584	1.70838	125	37.3333	4.88762e+09	394	42.9109	5.30029
Q5F652	Peptidylprolyl isomerase OS=Neisseria gonorrhoeae (strain ATCC 700825 / FA 1090) GN=NGO_1714 PE=4 SV=2 - [Q5F652_NEIG1]	218.549	62.35	1	23	23	92	1.49226	81	39.2569	1.67205	80	25.7711	1.92426	81	44.8836	1.94189e+09	332	35.7828	9.18799
Q5F7F3	Peptidyl-prolyl cis-trans isomerase OS=Neisseria gonorrhoeae (strain ATCC 700825 / FA 1090) GN=NGO_1225 PE=3 SV=1 - [Q5F7F3_NEIG1]	143.52	67.28	1	23	23	54	1.33538	54	25.5236	1.62925	54	13.6523	1.12159	54	14.1809	1.06799e+09	272	28.9038	5.85889
Q5F9M1	Amino acid ABC transporter substrate-binding protein OS=Neisseria gonorrhoeae (strain ATCC 700825 / FA 1090) GN=NGO_0372 PE=1 SV=2 - [Q5F9M1_NEIG1]	193.641	74.82	1	23	23	71	0.938959	68	18.4907	1.75255	68	13.2831	1.34241	68	15.9761	1.47475e+09	274	28.6949	6.60986
Q5F9Q2	Cysteine synthase OS=Neisseria gonorrhoeae (strain ATCC 700825 / FA 1090) GN=NGO_0340 PE=3 SV=1 - [Q5F9Q2_NEIG1]	250.352	76.45	1	23	23	120	0.636718	112	32.0588	2.02147	116	26.3546	1.34614	115	25.9918	5.32671e+09	310	32.7061	6.04932
Q5F9W0	Outer membrane protein assembly factor BamD OS=Neisseria gonorrhoeae (strain ATCC 700825 / FA 1090) GN=bamD PE=3 SV=1 - [Q5F9W0_NEIG1]	356.813	73.78	1	23	23	156	1.31523	132	24.3976	1.80291	132	34.3744	1.99852	132	40.0466	3.26435e+09	267	30.8196	8.86572
Q5F505	Lytic murein transglycosylase OS=Neisseria gonorrhoeae (strain ATCC 700825 / FA 1090) GN=NGO_2135 PE=4 SV=1 - [Q5F505_NEIG1]	152.845	49.35	1	22	22	55	1.90515	47	47.8905	1.45277	46	23.3784	2.11874	47	54.2435	5.90738e+08	616	67.4891	9.18799
Q5F571	Trifunctional thioredoxin/methionine sulfoxide reductase A/B protein OS=Neisseria gonorrhoeae (strain ATCC 700825 / FA 1090) GN=NGO_2059 PE=3 SV=1 - [Q5F571_NEIG1]	75.9315	36.78	1	22	22	30	1.68975	30	30.292	1.95241	30	20.7765	2.34984	30	28.0336	3.21344e+08	522	58.0211	7.48877
Q5F6P7	N-acetylmuramoyl-L-alanine amidase OS=Neisseria gonorrhoeae (strain ATCC 700825 / FA 1090) GN=amiC PE=4 SV=2 - [Q5F6P7_NEIG1]	164.114	60.82	1	22	22	57	1.24908	55	27.0559	2.24908	55	40.8596	2.42488	55	52.6489	6.44756e+08	416	45.1047	10.0815
Q5F6Q5	Putrescine-binding periplasmic protein OS=Neisseria gonorrhoeae (strain ATCC 700825 / FA 1090) GN=NGO_1494 PE=3 SV=1 - [Q5F6Q5_NEIG1]	105.333	51.58	1	21	22	39	1.00607	34	14.7125	1.85393	34	21.3485	1.31275	34	18.4537	442322502	380	41.2313	5.96045
Q5F8H0	GTP-binding protein OS=Neisseria gonorrhoeae (strain ATCC 700825 / FA 1090) GN=NGO_0803 PE=4 SV=1 - [Q5F8H0_NEIG1]	96.4024	38.47	1	22	22	37	0.83361	35	18.9966	2.17073	35	29.3201	1.94351	35	27.2909	1.65827e+08	603	67.1405	5.18604
Q5F8Y3	Murein transglycosylase OS=Neisseria gonorrhoeae (strain ATCC 700825 / FA 1090) GN=NGO_0626 PE=4 SV=1 - [Q5F8Y3_NEIG1]	128.465	58.95	1	22	22	47	1.65664	45	32.7852	1.64087	45	20.6592	2.04696	45	34.4084	4.86888e+08	363	39.7961	8.26514
Q5F938	Proline--tRNA ligase OS=Neisseria gonorrhoeae (strain ATCC 700825 / FA 1090) GN=proS PE=3 SV=1 - [SYP_NEIG1]	80.1518	38.6	1	22	22	35	0.868083	30	22.1609	2.28038	30	51.544	2.94286	30	56.5164	1.50946e+10	570	62.828	5.33838
Q5FAC7	Penicillin-binding protein 1A OS=Neisseria gonorrhoeae (strain ATCC 700825 / FA 1090) GN=mrcA PE=3 SV=3 - [PBPA_NEIG1]	75.0881	36.72	1	22	22	32	1.30418	28	21.0815	1.51164	28	27.6519	1.67188	28	47.5545	9.22304e+07	798	88.4396	9.46631
A0A0H4IT81	Opacity protein opA54 OS=Neisseria gonorrhoeae (strain ATCC 700825 / FA 1090) GN=NGO_09965 PE=4 SV=1 - [A0A0H4IT81_NEIG1]	209.376	53.62	1	3	21	86	0.904019	9	10.9573	1.37257	9	15.3973	2.35006	9	31.309	1.69405e+10	235	26.6903	9.65674
Q5F689	Pilus assembly protein PilF OS=Neisseria gonorrhoeae (strain ATCC 700825 / FA 1090) GN=NGO_1673 PE=4 SV=1 - [Q5F689_NEIG1]	93.8681	43.73	1	21	21	33	0.909852	31	20.4067	2.07847	31	28.2434	1.98353	31	37.4245	1.91515e+08	558	61.8519	5.89697
Q5F6H4	Adhesin MafA 2/3 OS=Neisseria gonorrhoeae (strain ATCC 700825 / FA 1090) GN=mafA2 PE=3 SV=1 - [MAFA2_NEIG1]	123.859	65.81	1	19	21	49	1.29821	38	33.5338	1.54243	38	24.5313	1.84747	38	20.6801	1.16442e+09	313	33.9054	9.0415
Q5F8Z6	Ribonucleoside-diphosphate reductase OS=Neisseria gonorrhoeae (strain ATCC 700825 / FA 1090) GN=NGO_0614 PE=3 SV=1 - [Q5F8Z6_NEIG1]	64.8591	27.27	1	21	21	30	0.880318	30	19.7096	1.71645	30	30.139	1.76558	30	37.2844	1.6594e+08	759	85.1152	6.20166
Q5FA09	Septum formation inhibitor Maf OS=Neisseria gonorrhoeae (strain ATCC 700825 / FA 1090) GN=NGO_0225 PE=4 SV=1 - [Q5FA09_NEIG1]	65.1372	30.1	1	21	21	26	0.965889	26	17.4279	1.13887	26	17.21	1.29117	26	18.5388	1.70742e+08	628	68.7139	9.26123
A0A0H4IWD4	Opacity protein opA54 OS=Neisseria gonorrhoeae (strain ATCC 700825 / FA 1090) GN=NGO_07725 PE=4 SV=1 - [A0A0H4IWD4_NEIG1]	386.273	52.74	1	6	20	178	1.29536	37	61.4888	2.28661	37	30.2197	2.50516	37	33.6822	3.35686e+10	237	27.1817	9.86182
A0A0H4J5B4	Opacity protein opA54 OS=Neisseria gonorrhoeae (strain ATCC 700825 / FA 1090) GN=NGO_00350 PE=4 SV=1 - [A0A0H4J5B4_NEIG1]	333.097	50.66	1	6	20	183	0.412204	17	22.0606	0.738923	17	22.3691	0.631867	17	30.7371	3.35686e+10	229	25.9973	9.89111
Q5F4Z2	ATP synthase subunit alpha OS=Neisseria gonorrhoeae (strain ATCC 700825 / FA 1090) GN=atpA PE=3 SV=1 - [ATPA_NEIG1]	70.3333	41.36	1	20	20	31	1.01623	30	23.1092	1.53979	30	40.9265	1.18993	30	37.535	1.38341e+08	515	55.2067	5.57959
Q5F501	Lipoprotein OS=Neisseria gonorrhoeae (strain ATCC 700825 / FA 1090) GN=NGO_2139 PE=3 SV=1 - [Q5F501_NEIG1]	120.329	68.4	1	20	20	48	1.07046	43	12.3531	1.93948	43	17.1879	1.26674	43	14.0999	647234583	288	31.318	5.43994
Q5F5H0	Membrane protein OS=Neisseria gonorrhoeae (strain ATCC 700825 / FA 1090) GN=NGO_1956 PE=4 SV=2 - [Q5F5H0_NEIG1]	59.6207	33.06	1	20	20	28	1.11451	27	18.1978	1.78149	27	17.6422	1.61689	27	33.6562	1.55402e+08	608	66.8251	7.73779
Q5F942	Dihydrolipoyl dehydrogenase OS=Neisseria gonorrhoeae (strain ATCC 700825 / FA 1090) GN=NGO_0562 PE=4 SV=1 - [Q5F942_NEIG1]	67.8767	33.5	1	20	20	25	0.955991	25	11.4263	1.57025	25	10.5101	0.850802	25	13.3032	3.43861e+08	594	61.7549	5.30029
Q5F9H4	Uncharacterized protein OS=Neisseria gonorrhoeae (strain ATCC 700825 / FA 1090) GN=NGO_0420 PE=4 SV=1 - [Q5F9H4_NEIG1]	248.791	56.97	1	20	20	105	1.73852	98	27.7887	1.67623	98	14.8916	2.05095	98	30.8391	3.29344e+09	244	27.1858	9.18799
Q5F543	FetA OS=Neisseria gonorrhoeae (strain ATCC 700825 / FA 1090) GN=NGO_2093 PE=3 SV=1 - [Q5F543_NEIG1]	60.3523	29.59	1	19	19	22	0.927577	21	16.7786	2.71933	21	20.0418	3.82196	21	24.1329	7.42523e+07	713	78.8162	9.62744
Q5F5F3	30S ribosomal protein S2 OS=Neisseria gonorrhoeae (strain ATCC 700825 / FA 1090) GN=rpsB PE=3 SV=1 - [RS2_NEIG1]	112.655	73.97	1	19	19	57	0.865672	55	18.3682	1.37495	55	14.4138	1.28268	55	17.135	1.81965e+09	242	26.9	9.02686
Q5F6Q7	Phospholipase A1 OS=Neisseria gonorrhoeae (strain ATCC 700825 / FA 1090) GN=NGO_1492 PE=4 SV=2 - [Q5F6Q7_NEIG1]	113.86	52.53	1	19	19	40	1.08399	38	11.6305	1.80411	38	21.6313	1.81142	38	26.1325	7.05449e+08	375	42.0761	8.98291
Q5F8J8	Lon protease OS=Neisseria gonorrhoeae (strain ATCC 700825 / FA 1090) GN=lon PE=2 SV=1 - [Q5F8J8_NEIG1]	73.5991	28.54	1	19	19	37	0.97256	30	12.4078	1.58655	30	16.3765	1.29615	30	19.2891	6.18728e+07	820	90.7261	7.23975
Q5F8Y0	DNA gyrase subunit A OS=Neisseria gonorrhoeae (strain ATCC 700825 / FA 1090) GN=gyrA PE=3 SV=1 - [Q5F8Y0_NEIG1]	74.4356	24.24	1	19	19	26	0.948604	26	14.9567	3.74619	26	68.6174	4.06337	26	71.3836	1.64151e+08	916	101.322	5.50342
Q5F5L5	Twitching motility protein PilT OS=Neisseria gonorrhoeae (strain ATCC 700825 / FA 1090) GN=NGO_1908 PE=4 SV=1 - [Q5F5L5_NEIG1]	75.1532	51.01	1	18	18	40	0.858221	39	8.13636	1.83014	39	29.8759	1.4356	39	36.1975	3.90094e+08	347	37.9756	6.93213
Q5F5R2	50S ribosomal protein L1 OS=Neisseria gonorrhoeae (strain ATCC 700825 / FA 1090) GN=rplA PE=3 SV=1 - [RL1_NEIG1]	61.1222	77.06	1	18	18	29	0.939616	29	18.205	1.47265	29	10.1451	1.41663	29	17.1962	5.26499e+08	231	24.107	9.5835
Q5F7H3	Ligand-gated channel OS=Neisseria gonorrhoeae (strain ATCC 700825 / FA 1090) GN=NGO_1205 PE=3 SV=2 - [Q5F7H3_NEIG1]	77.2473	32.72	1	18	18	27	1.14427	27	21.5958	1.71824	27	29.2521	1.41152	27	42.6707	1.76419e+08	758	84.8769	8.83643
Q5F807	Protein translocase subunit SecA OS=Neisseria gonorrhoeae (strain ATCC 700825 / FA 1090) GN=secA PE=3 SV=1 - [SECA_NEIG1]	46.729	20.96	1	18	18	18	0.934057	18	11.3348	1.6503	18	28.3626	1.31031	18	28.2698	9.74356e+07	916	103.139	5.21143
Q5F7E7	Aconitate hydratase B OS=Neisseria gonorrhoeae (strain ATCC 700825 / FA 1090) GN=NGO_1231 PE=3 SV=1 - [Q5F7E7_NEIG1]	48.5742	23.23	1	17	17	20	0.822828	19	17.3777	1.87455	19	27.7644	1.42303	19	28.249	9.57562e+07	861	92.6727	5.73193
Q5F8V0	Aspartyl/glutamyl-tRNA(Asn/Gln) amidotransferase subunit B OS=Neisseria gonorrhoeae (strain ATCC 700825 / FA 1090) GN=gatB PE=3 SV=1 - [GATB_NEIG1]	70.9804	46.01	1	17	17	26	0.858871	26	34.4248	2.03973	26	19.4677	2.21814	26	40.5296	1.59496e+08	476	51.6804	5.19873
Q5F8Z2	Enolase OS=Neisseria gonorrhoeae (strain ATCC 700825 / FA 1090) GN=eno PE=3 SV=1 - [ENO_NEIG1]	92.3567	40.89	1	17	17	33	0.999059	33	15.1318	2.54733	33	26.0915	2.52207	33	42.7386	2.22477e+09	428	46.083	4.89404
Q5F581	Murein transglycosylase OS=Neisseria gonorrhoeae (strain ATCC 700825 / FA 1090) GN=NGO_2048 PE=1 SV=1 - [Q5F581_NEIG1]	90.03	48.07	1	16	16	44	1.42797	41	51.6269	1.30866	41	27.3928	1.61846	41	55.1165	2.56194e+08	441	47.9866	9.74463
Q5F5F6	Adhesin MafA 1/4 OS=Neisseria gonorrhoeae (strain ATCC 700825 / FA 1090) GN=mafA1 PE=3 SV=1 - [MAFA1_NEIG1]	77.005	41.88	1	14	16	28	1.65361	24	39.0373	1.34359	24	11.8127	1.89889	24	41.3357	645108515	320	34.7295	7.60596
Q5F5W0	Valine--tRNA ligase OS=Neisseria gonorrhoeae (strain ATCC 700825 / FA 1090) GN=valS PE=3 SV=1 - [SYV_NEIG1]	45.0549	16.61	1	16	16	19	0.811806	19	13.0578	2.44516	19	38.0209	2.39158	19	26.1575	2.2459e+08	945	106.266	5.68115
Q5F601	Catalase OS=Neisseria gonorrhoeae (strain ATCC 700825 / FA 1090) GN=NGO_1767 PE=3 SV=1 - [Q5F601_NEIG1]	68.5509	32.74	1	16	16	25	0.893967	25	19.3883	2.61144	25	37.0645	2.28482	25	26.9396	2.66374e+08	504	57.2772	6.65381
Q5F655	Adenylosuccinate lyase OS=Neisseria gonorrhoeae (strain ATCC 700825 / FA 1090) GN=NGO_1711 PE=3 SV=1 - [Q5F655_NEIG1]	40.1516	38.82	1	16	16	16	0.912889	16	14.5103	2.35119	16	46.4195	2.18456	16	52.8819	1.161e+08	456	50.3052	5.98584
Q5F6A5	Peptidylprolyl isomerase OS=Neisseria gonorrhoeae (strain ATCC 700825 / FA 1090) GN=NGO_1655 PE=4 SV=1 - [Q5F6A5_NEIG1]	62.2374	71.43	1	16	16	24	1.57334	22	28.817	1.64599	22	18.5727	2.13486	22	27.5784	3.46768e+08	252	28.5519	8.70459
Q5F7E5	Ketol-acid reductoisomerase (NADP(+)) OS=Neisseria gonorrhoeae (strain ATCC 700825 / FA 1090) GN=ilvC PE=3 SV=1 - [ILVC_NEIG1]	55.6939	48.07	1	16	16	26	0.804028	26	12.2307	2.89624	26	28.7583	2.1165	26	26.2447	3.42484e+08	337	36.3943	6.23975
Q5F7T9	CMP-N-acetylneuraminate-beta-galactosamide-alpha-2, 3-sialyltransferase OS=Neisseria gonorrhoeae (strain ATCC 700825 / FA 1090) GN=NGO_1081 PE=4 SV=1 - [Q5F7T9_NEIG1]	47.2201	50.53	1	16	16	34	1.0375	31	29.0472	1.48407	31	26.0804	1.07834	31	27.5408	2.59026e+08	378	43.3773	8.98291
Q5F7W0	Peptidase OS=Neisseria gonorrhoeae (strain ATCC 700825 / FA 1090) GN=NGO_1056 PE=4 SV=2 - [Q5F7W0_NEIG1]	170.872	60.83	1	16	16	64	1.96874	60	62.7694	1.36599	60	20.3759	2.03647	60	52.6925	2.92625e+09	337	34.4686	9.45166
Q5F7Y3	Transketolase OS=Neisseria gonorrhoeae (strain ATCC 700825 / FA 1090) GN=NGO_1028 PE=3 SV=1 - [Q5F7Y3_NEIG1]	68.5505	30.05	1	16	16	23	0.863832	21	13.4075	1.94685	21	31.8847	2.07176	21	36.4795	2.0348e+08	659	71.5299	5.93506
Q5F874	2-oxoglutarate dehydrogenase OS=Neisseria gonorrhoeae (strain ATCC 700825 / FA 1090) GN=sucA PE=4 SV=1 - [Q5F874_NEIG1]	66.2626	18.37	1	16	16	21	0.952563	21	9.39811	1.8387	21	14.8806	1.47411	21	18.4547	5.56131e+07	942	105.053	6.771
Q5F8H4	Inosine-5'-monophosphate dehydrogenase OS=Neisseria gonorrhoeae (strain ATCC 700825 / FA 1090) GN=guaB PE=3 SV=1 - [Q5F8H4_NEIG1]	101.382	43.53	1	16	16	41	0.918811	40	19.1642	1.86595	40	22.7234	1.32203	40	18.0561	2.11249e+09	487	52.4064	7.1958
Q5F912	Pilus assembly protein PilW OS=Neisseria gonorrhoeae (strain ATCC 700825 / FA 1090) GN=NGO_0595 PE=4 SV=1 - [Q5F912_NEIG1]	153.114	57.71	1	16	16	64	1.61283	64	26.9462	1.81212	64	18.2913	2.19342	64	28.5144	2.94562e+09	253	28.4335	8.95361
Q5FA34	Phosphoenolpyruvate synthase OS=Neisseria gonorrhoeae (strain ATCC 700825 / FA 1090) GN=NGO_0200 PE=3 SV=1 - [Q5FA34_NEIG1]	61.2376	23.43	1	16	16	24	1.00151	23	17.4164	2.09339	23	40.3288	1.97818	23	40.4438	1.87073e+08	794	87.181	5.14795
O87407	GTPase Der OS=Neisseria gonorrhoeae (strain ATCC 700825 / FA 1090) GN=der PE=3 SV=1 - [DER_NEIG1]	47.3864	34.02	1	15	15	20	0.900164	20	15.7004	1.71662	20	22.0501	1.56362	20	13.7917	8.88449e+07	485	53.9946	9.48096
Q5F5F4	Elongation factor Ts OS=Neisseria gonorrhoeae (strain ATCC 700825 / FA 1090) GN=tsf PE=3 SV=1 - [EFTS_NEIG1]	134.33	42.61	1	15	15	38	0.747339	38	26.38	3.35356	38	33.7114	3.08779	38	35.1663	5.66145e+08	284	30.3397	5.18604
Q5F5J3	Glyceraldehyde-3-phosphate dehydrogenase OS=Neisseria gonorrhoeae (strain ATCC 700825 / FA 1090) GN=NGO_1931 PE=3 SV=1 - [Q5F5J3_NEIG1]	142.568	45.51	1	15	15	56	0.874572	54	21.1262	2.20466	55	28.0192	2.10506	55	33.5915	5.54061e+08	334	35.7384	5.73193
Q5F5T3	30S ribosomal protein S3 OS=Neisseria gonorrhoeae (strain ATCC 700825 / FA 1090) GN=rpsC PE=3 SV=1 - [RS3_NEIG1]	92.3755	54.35	1	15	15	37	0.825317	36	20.9904	1.412	37	16.8873	1.09461	37	23.5512	5.05234e+08	230	25.8098	10.4185
Q5F5W7	Membrane protein OS=Neisseria gonorrhoeae (strain ATCC 700825 / FA 1090) GN=NGO_1802 PE=3 SV=2 - [Q5F5W7_NEIG1]	130.578	46.39	1	15	15	48	1.28856	38	32.158	1.55671	38	24.0007	1.69864	38	31.9942	2.07766e+09	166	19.0769	8.38232
Q5F5Y0	tRNA uridine 5-carboxymethylaminomethyl modification enzyme MnmG OS=Neisseria gonorrhoeae (strain ATCC 700825 / FA 1090) GN=mnmG PE=3 SV=1 - [MNMG_NEIG1]	44.0765	25.16	1	15	15	19	0.889767	19	16.526	1.72613	19	19.528	1.55185	19	16.3127	83068613	628	69.5809	6.7417
Q5F6H8	Coproporphyrinogen-III oxidase OS=Neisseria gonorrhoeae (strain ATCC 700825 / FA 1090) GN=NGO_1580 PE=3 SV=1 - [Q5F6H8_NEIG1]	78.6345	37.21	1	15	15	30	0.887648	27	15.2901	1.90094	27	54.8343	1.82529	27	52.824	1.08784e+08	473	54.2496	6.72705
Q5F6I1	Membrane protein OS=Neisseria gonorrhoeae (strain ATCC 700825 / FA 1090) GN=NGO_1577 PE=3 SV=1 - [Q5F6I1_NEIG1]	844.41	36.44	1	15	15	546	1.81939	435	27.5378	1.64953	434	23.2578	2.13241	436	36.2359	6.10528e+10	236	25.5241	8.646
Q5F8E8	Chaperone protein HscA homolog OS=Neisseria gonorrhoeae (strain ATCC 700825 / FA 1090) GN=hscA PE=3 SV=1 - [HSCA_NEIG1]	48.0848	24.84	1	15	15	21	0.840817	21	20.0557	1.90531	21	32.8187	1.63888	21	52.5998	1.63307e+08	620	66.3803	5.41455
Q5F8K8	ABC transporter ATP-binding protein OS=Neisseria gonorrhoeae (strain ATCC 700825 / FA 1090) GN=NGO_0764 PE=4 SV=1 - [Q5F8K8_NEIG1]	39.2295	27.86	1	15	15	17	0.78234	17	17.7578	1.44655	17	10.5839	1.21967	17	12.9924	1.0817e+08	542	60.7686	5.24951
Q5F8T6	3-isopropylmalate dehydrogenase OS=Neisseria gonorrhoeae (strain ATCC 700825 / FA 1090) GN=leuB PE=3 SV=1 - [LEU3_NEIG1]	85.5268	48.88	1	15	15	29	0.908522	29	24.9096	1.91828	29	17.5435	1.75767	29	30.0739	2.71541e+08	356	39.0169	5.0083
Q5F8X4	Cysteine desulfurase IscS OS=Neisseria gonorrhoeae (strain ATCC 700825 / FA 1090) GN=iscS PE=3 SV=1 - [ISCS_NEIG1]	64.154	36.88	1	15	15	26	0.888823	26	21.2604	2.24962	26	25.7929	2.37676	26	32.2811	2.32408e+08	404	44.55	6.06201
Q5F940	Acetyltransferase component of pyruvate dehydrogenase complex OS=Neisseria gonorrhoeae (strain ATCC 700825 / FA 1090) GN=NGO_0564 PE=3 SV=1 - [Q5F940_NEIG1]	81.9985	25.33	1	15	15	33	1.07006	32	12.2828	1.29209	32	17.1431	0.483338	32	34.9142	8.41346e+08	529	54.6588	5.37646
Q5FA20	Phosphate acetyltransferase OS=Neisseria gonorrhoeae (strain ATCC 700825 / FA 1090) GN=NGO_0214 PE=4 SV=1 - [Q5FA20_NEIG1]	74.9187	35.8	1	15	15	28	0.954743	25	16.3927	2.34872	26	44.7013	2.11304	26	56.5398	2.48541e+08	500	52.0653	5.12256
Q5F4Z0	ATP synthase subunit beta OS=Neisseria gonorrhoeae (strain ATCC 700825 / FA 1090) GN=atpD PE=3 SV=1 - [ATPB_NEIG1]	42.2182	42.15	1	14	14	21	0.967191	21	19.3478	1.62732	21	36.8156	1.12014	21	26.2385	1.17941e+08	465	50.3918	5.16064
Q5F5E9	Probable malate:quinone oxidoreductase OS=Neisseria gonorrhoeae (strain ATCC 700825 / FA 1090) GN=mqo PE=3 SV=1 - [MQO_NEIG1]	69.8678	32.99	1	14	14	20	0.647859	20	21.658	1.4927	20	21.3815	1.14945	20	18.0018	1.03442e+08	488	54.1235	6.1001
Q5F5T9	50S ribosomal protein L5 OS=Neisseria gonorrhoeae (strain ATCC 700825 / FA 1090) GN=rplE PE=3 SV=1 - [RL5_NEIG1]	121.214	62.01	1	14	14	46	0.810459	46	14.2825	1.67275	46	17.0458	1.51737	46	19.7116	9.07875e+08	179	20.3659	9.5249
Q5F6R5	L,D-transpeptidase catalytic domain protein OS=Neisseria gonorrhoeae (strain ATCC 700825 / FA 1090) GN=NGO_1484 PE=4 SV=2 - [Q5F6R5_NEIG1]	51.4764	36.05	1	14	14	19	1.30809	18	20.5873	1.58477	18	21.6365	2.11703	18	34.4674	2.43043e+08	344	36.7888	7.84033
Q5F6V7	Thiol:disulfide interchange protein OS=Neisseria gonorrhoeae (strain ATCC 700825 / FA 1090) GN=NGO_1438 PE=1 SV=1 - [Q5F6V7_NEIG1]	149.811	41.76	1	14	14	62	1.59823	62	40.0961	1.61645	62	25.9071	2.10132	62	58.7642	3.90594e+09	261	28.6878	8.27979
Q5F9P7	Twitching motility protein PilT OS=Neisseria gonorrhoeae (strain ATCC 700825 / FA 1090) GN=NGO_0346 PE=4 SV=2 - [Q5F9P7_NEIG1]	61.9216	46.81	1	14	14	34	0.89441	32	22.9297	2.37631	32	33.9721	2.1608	32	36.1626	2.80492e+08	376	42.1887	6.34131
Q5F9U4	Threonine--tRNA ligase OS=Neisseria gonorrhoeae (strain ATCC 700825 / FA 1090) GN=thrS PE=3 SV=1 - [SYT_NEIG1]	47.4594	19.15	1	14	14	18	0.96935	18	25.828	2.58069	18	35.4127	2.61169	18	49.74	2.18117e+08	637	72.6797	6.11279
Q5FA35	Transcription termination factor Rho OS=Neisseria gonorrhoeae (strain ATCC 700825 / FA 1090) GN=rho PE=3 SV=1 - [Q5FA35_NEIG1]	62.9396	33.41	1	14	14	22	0.80123	21	15.6775	1.53116	21	19.3072	1.25464	21	17.1987	6.3052e+07	419	47.2897	6.68311
Q5FA63	ABC transporter substrate-binding protein OS=Neisseria gonorrhoeae (strain ATCC 700825 / FA 1090) GN=NGO_0168 PE=3 SV=1 - [Q5FA63_NEIG1]	69.0721	48.7	1	14	14	27	1.36549	26	34.4331	1.56505	26	40.5113	2.14061	26	71.4284	2.86072e+08	308	33.7072	7.62061
Q5FAC8	Pilus assembly protein PilM OS=Neisseria gonorrhoeae (strain ATCC 700825 / FA 1090) GN=NGO_0098 PE=4 SV=1 - [Q5FAC8_NEIG1]	87.7099	44.74	1	14	14	36	0.877689	35	22.811	1.90057	35	16.4266	1.61292	35	25.1435	5.40409e+08	371	41.2852	5.2749
Q5F5E4	Hemolysin OS=Neisseria gonorrhoeae (strain ATCC 700825 / FA 1090) GN=NGO_1985 PE=4 SV=1 - [Q5F5E4_NEIG1]	169.077	75.74	1	13	13	74	1.92271	66	40.6977	1.47892	66	19.5865	2.16555	66	48.3312	2.93859e+09	202	21.7145	9.80322
Q5F5F7	Septum formation inhibitor Maf OS=Neisseria gonorrhoeae (strain ATCC 700825 / FA 1090) GN=NGO_1971 PE=4 SV=1 - [Q5F5F7_NEIG1]	49.8294	30.92	2	5	13	19	1.26704	8	24.1075	1.37194	8	37.5877	1.66245	8	36.6799	1.11128e+08	498	53.894	8.104
Q5F5G5	Argininosuccinate synthase OS=Neisseria gonorrhoeae (strain ATCC 700825 / FA 1090) GN=argG PE=3 SV=1 - [ASSY_NEIG1]	64.7561	38.93	1	13	13	25	0.936129	23	15.9885	2.18724	23	17.8749	2.17391	23	28.9988	1.18007e+08	447	49.6571	5.30029
Q5F5L4	Twitching motility protein PilT OS=Neisseria gonorrhoeae (strain ATCC 700825 / FA 1090) GN=NGO_1909 PE=4 SV=1 - [Q5F5L4_NEIG1]	34.164	37.5	1	13	13	16	0.929783	16	18.5422	1.89359	16	18.1402	1.40027	16	19.8173	9.97488e+07	408	45.6696	7.34229
Q5F5U4	30S ribosomal protein S5 OS=Neisseria gonorrhoeae (strain ATCC 700825 / FA 1090) GN=rpsE PE=3 SV=1 - [RS5_NEIG1]	59.1931	68.02	1	13	13	26	0.736055	26	22.5572	1.25012	26	13.5595	1.16306	26	17.6368	970172266	172	18.2347	10.0376
Q5F5V2	DNA-directed RNA polymerase subunit alpha OS=Neisseria gonorrhoeae (strain ATCC 700825 / FA 1090) GN=rpoA PE=3 SV=1 - [RPOA_NEIG1]	41.813	34.15	1	13	13	15	0.845085	15	23.8923	2.10646	15	23.331	1.55114	15	53.2288	1.89957e+08	328	35.9788	5.09717
Q5F5Y3	Ribonuclease E OS=Neisseria gonorrhoeae (strain ATCC 700825 / FA 1090) GN=rne PE=3 SV=1 - [Q5F5Y3_NEIG1]	39.6187	21	1	13	13	18	0.885303	17	28.4739	1.41448	17	27.8939	0.76911	17	40.1883	4.95397e+07	919	101.604	6.69775
Q5F674	Membrane protein OS=Neisseria gonorrhoeae (strain ATCC 700825 / FA 1090) GN=NGO_1688 PE=4 SV=1 - [Q5F674_NEIG1]	46.243	27.81	1	13	13	19	0.919141	19	19.4433	1.65444	19	37.0605	1.34568	19	35.368	9.16743e+07	489	56.4637	9.75928
Q5F731	Glutamate dehydrogenase OS=Neisseria gonorrhoeae (strain ATCC 700825 / FA 1090) GN=NGO_1358 PE=3 SV=1 - [Q5F731_NEIG1]	52.4458	34.46	1	13	13	23	0.834244	21	13.4584	2.93224	21	36.8645	2.33954	21	51.9351	1.71283e+08	444	48.4425	6.04932
Q5F7A6	Uncharacterized protein OS=Neisseria gonorrhoeae (strain ATCC 700825 / FA 1090) GN=NGO_1274 PE=4 SV=1 - [Q5F7A6_NEIG1]	57.8514	37.15	1	13	13	20	1.56346	20	39.9808	1.85362	20	37.5151	2.20298	20	64.5264	4.73811e+08	393	42.2346	8.76318
Q5F7G6	CTP synthase OS=Neisseria gonorrhoeae (strain ATCC 700825 / FA 1090) GN=pyrG PE=3 SV=1 - [PYRG_NEIG1]	43.0949	24.82	1	13	13	20	0.867471	20	19.3285	2.29261	20	23.7091	1.83485	20	38.0191	3.39124e+09	544	59.8037	6.23975
Q5F8E4	Membrane protein OS=Neisseria gonorrhoeae (strain ATCC 700825 / FA 1090) GN=NGO_0834 PE=4 SV=1 - [Q5F8E4_NEIG1]	73.1824	59.19	1	13	13	31	1.48545	25	24.6625	1.69434	25	19.9436	2.08754	25	31.817	4.22129e+08	223	23.6971	8.41162
Q5F9F4	50S ribosomal protein L25 OS=Neisseria gonorrhoeae (strain ATCC 700825 / FA 1090) GN=rplY PE=3 SV=1 - [RL25_NEIG1]	105.359	59.47	1	13	13	39	0.797735	34	14.4469	1.7135	34	14.973	1.52606	34	21.2395	1.16545e+09	190	20.9412	7.13721
Q5FA28	Putrescine-binding periplasmic protein OS=Neisseria gonorrhoeae (strain ATCC 700825 / FA 1090) GN=NGO_0206 PE=3 SV=1 - [Q5FA28_NEIG1]	54.0881	35.98	1	12	13	22	1.15721	21	16.4516	1.76878	21	18.6582	1.41016	21	15.7986	1.65226e+08	378	41.1558	5.87158
Q5F4Y0	3-ketoacyl-ACP reductase OS=Neisseria gonorrhoeae (strain ATCC 700825 / FA 1090) GN=fabG PE=4 SV=1 - [Q5F4Y0_NEIG1]	72.7286	63.71	1	12	12	36	0.978973	32	23.3122	1.55417	32	18.1953	1.40726	32	25.4905	2.25916e+08	248	26.0184	8.104
Q5F5H6	Esterase OS=Neisseria gonorrhoeae (strain ATCC 700825 / FA 1090) GN=NGO_1949 PE=4 SV=1 - [Q5F5H6_NEIG1]	88.9777	48.33	1	12	12	33	1.82031	30	40.9379	1.59451	30	25.129	2.5195	30	49.0146	3.38129e+08	300	31.3349	9.96436
Q5F5M1	Chaperone protein DnaJ OS=Neisseria gonorrhoeae (strain ATCC 700825 / FA 1090) GN=dnaJ PE=3 SV=1 - [DNAJ_NEIG1]	46.6223	30.03	1	12	12	15	0.855312	15	6.87564	1.40885	15	15.5301	1.26148	15	32.1184	1.90068e+08	373	40.5763	8.14795
Q5F5R3	50S ribosomal protein L10 OS=Neisseria gonorrhoeae (strain ATCC 700825 / FA 1090) GN=rplJ PE=3 SV=1 - [RL10_NEIG1]	55.9851	69.88	1	12	12	32	0.832276	28	21.4264	1.51958	30	18.0784	1.52793	29	26.6936	1.13826e+09	166	17.6114	8.32373
Q5F5T7	50S ribosomal protein L14 OS=Neisseria gonorrhoeae (strain ATCC 700825 / FA 1090) GN=rplN PE=3 SV=1 - [RL14_NEIG1]	72.0166	65.57	1	12	12	26	0.804838	25	8.84741	1.22107	25	10.1041	1.04321	25	20.4197	2.69183e+09	122	13.3944	10.5796
Q5F5Z6	DNA gyrase subunit B OS=Neisseria gonorrhoeae (strain ATCC 700825 / FA 1090) GN=gyrB PE=3 SV=1 - [Q5F5Z6_NEIG1]	51.0957	15.7	1	12	12	17	0.805649	17	22.8245	2.32102	17	34.792	1.96019	17	23.7795	4.12542e+07	796	88.1542	5.61768
Q5F666	Signal recognition particle protein OS=Neisseria gonorrhoeae (strain ATCC 700825 / FA 1090) GN=ffh PE=3 SV=1 - [Q5F666_NEIG1]	36.0953	28.51	1	12	12	16	0.905326	16	9.33529	1.40712	16	14.5633	1.25726	16	22.3285	1.14373e+08	456	49.4692	9.17334
Q5F6H3	Septum formation inhibitor Maf OS=Neisseria gonorrhoeae (strain ATCC 700825 / FA 1090) GN=NGO_1585 PE=4 SV=1 - [Q5F6H3_NEIG1]	27.9332	20.83	7	12	12	13	0.936259	13	52.6833	1.4181	13	14.8123	1.31905	13	36.6273	1.27514e+08	576	63.1388	8.90967
Q5F752	Serine--tRNA ligase OS=Neisseria gonorrhoeae (strain ATCC 700825 / FA 1090) GN=serS PE=3 SV=1 - [SYS_NEIG1]	37.099	32.48	1	12	12	15	0.840103	15	26.457	1.74454	15	26.7789	1.71598	15	26.0395	3.92145e+07	431	47.7983	6.01123
Q5F8G6	Dihydroxy-acid dehydratase OS=Neisseria gonorrhoeae (strain ATCC 700825 / FA 1090) GN=ilvD PE=3 SV=1 - [ILVD_NEIG1]	39.467	23.59	1	12	12	14	0.905532	14	21.3915	1.91338	14	46.3316	1.62091	14	47.9231	2.87851e+08	619	66.7996	6.30322
Q5F8K6	Peptidylprolyl isomerase OS=Neisseria gonorrhoeae (strain ATCC 700825 / FA 1090) GN=NGO_0766 PE=4 SV=1 - [Q5F8K6_NEIG1]	38.1951	25.59	1	12	12	16	1.01823	16	20.5197	1.8103	16	19.2408	2.01577	16	30.6584	1.03535e+08	512	56.6792	6.16357
Q5F8Y5	Oxidoreductase OS=Neisseria gonorrhoeae (strain ATCC 700825 / FA 1090) GN=NGO_0624 PE=4 SV=2 - [Q5F8Y5_NEIG1]	44.849	25.49	1	12	12	19	0.835894	19	16.4254	1.82609	19	19.8455	1.77043	19	25.6363	8.67397e+07	463	52.2521	6.69775
Q5F950	TonB-dependent receptor OS=Neisseria gonorrhoeae (strain ATCC 700825 / FA 1090) GN=NGO_0553 PE=3 SV=1 - [Q5F950_NEIG1]	34.8784	8.79	1	12	12	12	0.948862	12	27.1097	1.88007	12	32.1698	1.36293	12	37.0503	6.56607e+07	1206	136.45	8.88037
Q5F9Z9	DNA ligase OS=Neisseria gonorrhoeae (strain ATCC 700825 / FA 1090) GN=ligA PE=3 SV=1 - [DNLJ_NEIG1]	25.4432	17.13	1	12	12	12	0.853983	12	22.0694	2.12244	12	23.443	1.90174	12	27.9081	4.51367e+07	823	90.1483	5.8208
Q5FAI4	Fructose-1,6-bisphosphate aldolase OS=Neisseria gonorrhoeae (strain ATCC 700825 / FA 1090) GN=NGO_0034 PE=3 SV=1 - [Q5FAI4_NEIG1]	72.3211	48.02	1	12	12	22	0.936682	22	20.1168	2.1536	22	48.5436	2.15303	22	57.1829	2.19149e+08	354	38.2884	6.02393
Q5FAJ3	Leucine--tRNA ligase OS=Neisseria gonorrhoeae (strain ATCC 700825 / FA 1090) GN=leuS PE=3 SV=2 - [SYL_NEIG1]	39.5976	15.64	1	12	12	15	0.987347	13	9.05216	2.52037	13	18.9775	2.51827	13	26.0908	7.60565e+07	876	97.9867	5.43994
A0A0H4IVH0	Bifunctional protein PutA OS=Neisseria gonorrhoeae (strain ATCC 700825 / FA 1090) GN=NGO_08225 PE=3 SV=1 - [A0A0H4IVH0_NEIG1]	36.2556	11.99	1	11	11	17	0.804228	17	18.3075	1.38511	17	40.6857	0.861091	17	47.775	6.17074e+07	1201	129.553	6.41748
A0A0H4IWJ0	Uncharacterized protein OS=Neisseria gonorrhoeae (strain ATCC 700825 / FA 1090) GN=NGO_10985 PE=4 SV=1 - [A0A0H4IWJ0_NEIG1]	202.588	59.57	3	8	11	73	7.26602	52	112.135	1.0054	49	39.7825	6.98678	52	121.079	1.54346e+09	141	14.9736	9.14404
Q5F570	Signal recognition particle receptor FtsY OS=Neisseria gonorrhoeae (strain ATCC 700825 / FA 1090) GN=ftsY PE=3 SV=1 - [Q5F570_NEIG1]	69.3031	37.77	1	11	11	21	0.820153	20	16.7436	1.24739	20	17.6621	1.25554	20	28.8766	1.33854e+08	421	44.7316	5.22412
Q5F585	Methionine--tRNA ligase OS=Neisseria gonorrhoeae (strain ATCC 700825 / FA 1090) GN=metG PE=3 SV=1 - [SYM_NEIG1]	34.9862	19.44	1	11	11	13	0.86433	13	12.8469	3.00005	13	28.2897	3.34117	13	25.105	5.64989e+07	684	76.8951	5.70654
Q5F5B5	ABC transporter substrate-binding protein OS=Neisseria gonorrhoeae (strain ATCC 700825 / FA 1090) GN=NGO_2014 PE=1 SV=1 - [Q5F5B5_NEIG1]	57.9295	46.48	1	11	11	30	0.89946	27	23.0738	1.52262	27	10.9778	1.23095	27	15.4559	3.75538e+08	284	30.1818	6.15088
Q5F5G8	Membrane protein OS=Neisseria gonorrhoeae (strain ATCC 700825 / FA 1090) GN=NGO_1958 PE=4 SV=1 - [Q5F5G8_NEIG1]	53.6999	28.67	1	11	11	17	1.33652	17	20.954	1.45597	17	18.6233	1.36654	17	26.4636	1.448e+09	429	44.6165	5.04639
Q5F5S2	30S ribosomal protein S7 OS=Neisseria gonorrhoeae (strain ATCC 700825 / FA 1090) GN=rpsG PE=3 SV=1 - [RS7_NEIG1]	81.6275	57.05	1	11	11	40	0.82074	34	10.7238	1.04122	34	16.6481	0.906422	34	14.1234	4.41971e+08	156	17.6335	10.3306
Q5F5S7	50S ribosomal protein L3 OS=Neisseria gonorrhoeae (strain ATCC 700825 / FA 1090) GN=rplC PE=3 SV=1 - [RL3_NEIG1]	62.3014	47.2	1	11	11	26	0.797428	26	17.2815	1.12181	26	10.5455	1.05831	26	20.6888	3.61246e+08	214	22.664	10.0376
Q5F5T2	50S ribosomal protein L22 OS=Neisseria gonorrhoeae (strain ATCC 700825 / FA 1090) GN=rplV PE=3 SV=1 - [RL22_NEIG1]	77.6954	60.55	1	10	11	43	0.813475	32	15.8078	1.36077	32	14.3643	1.18515	32	22.3477	4.12959e+08	109	11.9015	10.2866
Q5F5V1	30S ribosomal protein S4 OS=Neisseria gonorrhoeae (strain ATCC 700825 / FA 1090) GN=rpsD PE=3 SV=1 - [RS4_NEIG1]	57.5573	40.78	1	11	11	25	0.916642	25	16.9393	1.23013	25	18.7786	0.944259	25	22.7242	3.74337e+08	206	23.2355	9.99365
Q5F6F9	Glutamine synthetase OS=Neisseria gonorrhoeae (strain ATCC 700825 / FA 1090) GN=NGO_1600 PE=3 SV=1 - [Q5F6F9_NEIG1]	67.1857	17.8	1	11	11	26	0.788092	24	11.9043	1.82944	24	19.9234	1.30032	24	14.5177	4.99084e+08	472	51.9717	5.40186
Q5F798	Transcription termination/antitermination protein NusA OS=Neisseria gonorrhoeae (strain ATCC 700825 / FA 1090) GN=nusA PE=3 SV=2 - [Q5F798_NEIG1]	34.3289	24.6	1	11	11	14	0.860217	14	21.3049	2.31327	14	27.6321	2.02572	14	41.566	1.07817e+08	500	55.7595	4.64014
Q5F7E2	Acetolactate synthase OS=Neisseria gonorrhoeae (strain ATCC 700825 / FA 1090) GN=NGO_1236 PE=3 SV=1 - [Q5F7E2_NEIG1]	28.2743	20	1	11	11	15	0.813809	15	10.7152	2.00008	15	41.9604	1.55206	15	32.4403	2.62718e+07	575	62.8161	6.13818
Q5F7G1	Glutathione synthetase OS=Neisseria gonorrhoeae (strain ATCC 700825 / FA 1090) GN=gshB PE=3 SV=2 - [Q5F7G1_NEIG1]	34.7246	41.19	1	11	11	15	0.867299	15	14.8184	1.84739	15	21.8568	1.82877	15	51.3323	8.69637e+07	318	35.134	6.59521
Q5F823	Thiol:disulfide interchange protein DsbD OS=Neisseria gonorrhoeae (strain ATCC 700825 / FA 1090) GN=dsbD PE=3 SV=2 - [Q5F823_NEIG1]	69.2297	23.79	1	11	11	31	2.14397	26	30.0264	1.56761	26	14.3719	2.95144	26	18.6216	8.37708e+08	601	64.8997	6.80029
Q5F8J4	Homoserine dehydrogenase OS=Neisseria gonorrhoeae (strain ATCC 700825 / FA 1090) GN=NGO_0779 PE=3 SV=1 - [Q5F8J4_NEIG1]	38.6367	33.33	1	11	11	17	0.967145	17	18.3666	1.79183	17	18.3684	1.45104	17	34.3794	4.77121e+08	435	46.5306	5.5415
Q5F8P8	Glucose-6-phosphate isomerase 1 OS=Neisseria gonorrhoeae (strain ATCC 700825 / FA 1090) GN=pgi1 PE=3 SV=1 - [G6PI1_NEIG1]	28.2744	24.09	1	11	11	12	0.94394	12	29.6165	2.1356	12	27.9363	1.94062	12	32.9901	5.61802e+07	548	62.0774	6.46826
Q5F9P9	Elongation factor 4 OS=Neisseria gonorrhoeae (strain ATCC 700825 / FA 1090) GN=lepA PE=3 SV=1 - [LEPA_NEIG1]	28.6112	19.43	1	11	11	17	0.904872	17	24.9762	1.92172	17	34.4413	1.83926	17	36.737	1.69135e+08	597	65.9605	5.45264
Q5F518	ABC transporter OS=Neisseria gonorrhoeae (strain ATCC 700825 / FA 1090) GN=NGO_2121 PE=4 SV=1 - [Q5F518_NEIG1]	40.1913	34.3	1	10	10	17	0.335912	16	155.032	1.78675	16	14.3361	0.313561	16	182.862	1.23985e+08	277	29.622	5.021
Q5F526	Uncharacterized protein OS=Neisseria gonorrhoeae (strain ATCC 700825 / FA 1090) GN=NGO_2111 PE=4 SV=2 - [Q5F526_NEIG1]	30.2264	22.49	1	10	10	10	1.10379	10	29.331	1.73209	10	26.8872	1.87	10	42.7141	54073551	507	55.4663	9.62744
Q5F574	ABC transporter substrate-binding protein OS=Neisseria gonorrhoeae (strain ATCC 700825 / FA 1090) GN=NGO_2056 PE=4 SV=1 - [Q5F574_NEIG1]	88.8356	30.03	1	10	10	31	1.55156	29	33.9333	1.59674	29	24.1688	3.10927	29	39.9057	3.96018e+08	333	36.3012	9.72998
Q5F584	Glutamine--fructose-6-phosphate aminotransferase [isomerizing] OS=Neisseria gonorrhoeae (strain ATCC 700825 / FA 1090) GN=glmS PE=3 SV=3 - [GLMS_NEIG1]	24.2911	15.2	1	10	10	11	0.910022	11	13.7017	1.79177	11	32.3917	1.75031	11	40.8841	6.78537e+07	612	66.4466	6.56592
Q5F5R1	50S ribosomal protein L11 OS=Neisseria gonorrhoeae (strain ATCC 700825 / FA 1090) GN=rplK PE=3 SV=1 - [RL11_NEIG1]	61.4716	58.33	1	10	10	20	0.768442	20	11.5721	1.51549	20	9.46596	1.45018	20	13.7612	6.90189e+08	144	14.9801	9.70068
Q5F5S8	50S ribosomal protein L4 OS=Neisseria gonorrhoeae (strain ATCC 700825 / FA 1090) GN=rplD PE=3 SV=1 - [RL4_NEIG1]	101.451	57.77	1	10	10	43	0.80047	39	24.0124	1.23732	39	15.3643	1.102	38	28.5252	1.0186e+09	206	23.2885	9.99365
Q5F5T0	50S ribosomal protein L2 OS=Neisseria gonorrhoeae (strain ATCC 700825 / FA 1090) GN=rplB PE=3 SV=1 - [RL2_NEIG1]	61.1283	31.77	1	10	10	27	0.964567	26	20.2038	1.33234	26	19.4247	0.779499	26	26.9207	3.51741e+08	277	30.098	10.6528
Q5F5U2	50S ribosomal protein L6 OS=Neisseria gonorrhoeae (strain ATCC 700825 / FA 1090) GN=rplF PE=3 SV=1 - [RL6_NEIG1]	29.4132	51.41	1	10	10	15	0.721264	14	22.7286	1.25034	14	15.0451	0.997643	14	9.57887	5.60646e+08	177	18.928	9.59814
Q5F5Y8	Outer membrane protein assembly factor BamE OS=Neisseria gonorrhoeae (strain ATCC 700825 / FA 1090) GN=bamE PE=3 SV=1 - [Q5F5Y8_NEIG1]	138.873	75.2	1	10	10	66	1.36908	57	21.4067	1.81144	57	23.0465	2.07998	57	33.3239	4.0958e+09	125	13.9444	9.14404
Q5F649	DSBA oxidoreductase OS=Neisseria gonorrhoeae (strain ATCC 700825 / FA 1090) GN=NGO_1717 PE=4 SV=1 - [Q5F649_NEIG1]	42.5259	31.2	1	10	10	16	1.19891	16	12.4731	1.93392	16	14.1748	1.30597	16	11.0128	1.38391e+08	234	25.404	5.87158
Q5F6E9	Transaldolase OS=Neisseria gonorrhoeae (strain ATCC 700825 / FA 1090) GN=tal PE=1 SV=1 - [TAL_NEIG1]	39.8963	30.48	1	10	10	14	0.856748	14	19.7156	1.63872	14	15.4929	1.44009	14	16.1804	9.68282e+07	351	37.4786	5.59229
Q5F6U2	Lysine--tRNA ligase OS=Neisseria gonorrhoeae (strain ATCC 700825 / FA 1090) GN=lysS PE=3 SV=1 - [SYK_NEIG1]	36.8862	18.89	1	10	10	15	0.828326	14	22.1893	2.52867	14	23.4663	2.22588	14	34.6045	1.1479e+08	503	57.344	5.35107
Q5F751	Lactate dehydrogenase OS=Neisseria gonorrhoeae (strain ATCC 700825 / FA 1090) GN=NGO_1336 PE=3 SV=1 - [Q5F751_NEIG1]	42.1626	33.73	1	9	10	15	1.02777	14	21.4733	2.20002	14	11.551	2.24635	14	15.265	2.79794e+08	332	36.6104	5.85889
Q5F759	Cytochrome OS=Neisseria gonorrhoeae (strain ATCC 700825 / FA 1090) GN=NGO_1328 PE=4 SV=1 - [Q5F759_NEIG1]	35.7707	34.05	1	10	10	18	0.920407	13	26.1636	1.48573	13	14.05	1.29546	13	27.6943	6.51106e+07	279	28.7374	6.30322
Q5F7G0	Glutamine--tRNA ligase OS=Neisseria gonorrhoeae (strain ATCC 700825 / FA 1090) GN=glnS PE=3 SV=2 - [SYQ_NEIG1]	24.4844	20.46	1	10	10	11	0.886598	11	16.7851	1.71245	11	32.8566	1.2927	11	28.0863	4.60167e+07	562	64.5314	6.32861
Q5F7H1	UvrABC system protein A OS=Neisseria gonorrhoeae (strain ATCC 700825 / FA 1090) GN=uvrA PE=3 SV=1 - [Q5F7H1_NEIG1]	30.3719	10.54	1	10	10	11	0.86297	11	10.6077	1.68145	11	19.4091	1.19461	11	35.4806	2.18177e+07	949	105.411	7.10791
Q5F805	RNA polymerase sigma factor RpoD OS=Neisseria gonorrhoeae (strain ATCC 700825 / FA 1090) GN=rpoD PE=3 SV=1 - [Q5F805_NEIG1]	22.2014	15.11	1	10	10	11	0.987754	11	14.1092	1.99761	11	36.4311	1.7406	11	47.4367	5.62508e+07	642	73.6343	4.99561
Q5F824	Acetate kinase OS=Neisseria gonorrhoeae (strain ATCC 700825 / FA 1090) GN=ackA PE=3 SV=2 - [Q5F824_NEIG1]	36.7433	33.92	1	10	10	16	0.960069	16	26.2196	1.77524	16	41.1131	1.83225	16	49.5391	3.69512e+08	398	42.3778	5.88428
Q5F835	Arginine--tRNA ligase OS=Neisseria gonorrhoeae (strain ATCC 700825 / FA 1090) GN=argS PE=3 SV=1 - [SYR_NEIG1]	34.8891	20.98	1	10	10	13	0.863674	12	15.6447	1.96995	12	38.5861	1.70146	12	48.5332	3.52248e+07	572	62.5812	5.78271
Q5F842	Aspartokinase OS=Neisseria gonorrhoeae (strain ATCC 700825 / FA 1090) GN=NGO_0956 PE=3 SV=1 - [Q5F842_NEIG1]	28.2886	24.2	1	10	10	15	0.809626	14	20.1386	2.28922	14	58.0467	1.87732	14	52.3832	2.08015e+08	405	43.3714	5.30029
Q5F865	Glutathione peroxidase OS=Neisseria gonorrhoeae (strain ATCC 700825 / FA 1090) GN=NGO_0926 PE=4 SV=1 - [Q5F865_NEIG1]	40.3364	39.59	1	10	10	15	0.986548	15	7.15486	2.55494	15	11.1532	1.63051	15	13.0901	4.66602e+08	245	26.8622	5.0083
Q5F866	Dihydrolipoamide dehydrogenase OS=Neisseria gonorrhoeae (strain ATCC 700825 / FA 1090) GN=NGO_0925 PE=4 SV=1 - [Q5F866_NEIG1]	53.8426	35.97	1	10	10	18	0.90233	17	26.4145	2.50975	17	46.0534	2.32705	17	42.7791	1.26841e+08	467	50.8003	6.40479
Q5F875	Dihydrolipoyllysine-residue succinyltransferase component of 2-oxoglutarate dehydrogenase complex OS=Neisseria gonorrhoeae (strain ATCC 700825 / FA 1090) GN=NGO_0916 PE=3 SV=1 - [Q5F875_NEIG1]	32.8368	32.57	1	10	10	15	1.07878	15	21.8419	1.63239	15	27.9549	1.03343	15	37.8693	7.34138e+07	393	41.6591	5.26221
Q5F887	Uncharacterized protein OS=Neisseria gonorrhoeae (strain ATCC 700825 / FA 1090) GN=NGO_0902 PE=4 SV=1 - [Q5F887_NEIG1]	28.441	24.57	1	10	10	13	1.23689	13	32.967	1.31858	13	54.7308	1.4631	13	30.7961	7.10777e+07	525	59.208	8.96826
Q5F8J0	Uncharacterized protein OS=Neisseria gonorrhoeae (strain ATCC 700825 / FA 1090) GN=NGO_0783 PE=4 SV=1 - [Q5F8J0_NEIG1]	48.5904	55.88	1	10	10	30	1.90105	22	42.8394	1.15301	21	12.6133	2.20609	22	67.9009	3.63209e+08	170	18.4598	9.94971
Q5F8Q3	Phosphogluconate dehydratase OS=Neisseria gonorrhoeae (strain ATCC 700825 / FA 1090) GN=NGO_0714 PE=3 SV=1 - [Q5F8Q3_NEIG1]	34.0228	18.17	1	10	10	13	0.960063	13	14.5918	2.67498	13	34.7451	2.37963	13	37.3599	1.20583e+08	611	66.1965	7.02002
Q5F8T2	Uncharacterized protein OS=Neisseria gonorrhoeae (strain ATCC 700825 / FA 1090) GN=NGO_0678 PE=4 SV=1 - [Q5F8T2_NEIG1]	150.031	69.05	1	10	10	56	1.24001	55	22.4557	1.73983	55	19.6954	1.91821	55	24.8516	9.66606e+09	84	8.77855	9.43701
Q5F8U8	Glutamyl-tRNA(Gln) amidotransferase subunit A OS=Neisseria gonorrhoeae (strain ATCC 700825 / FA 1090) GN=gatA PE=3 SV=1 - [GATA_NEIG1]	34.9799	22.87	1	10	10	13	0.903326	11	16.8723	2.2369	13	22.1985	2.18985	13	31.2063	127695941	481	51.2737	5.64307
Q5F922	50S ribosomal protein L9 OS=Neisseria gonorrhoeae (strain ATCC 700825 / FA 1090) GN=rplI PE=3 SV=1 - [RL9_NEIG1]	38.4068	60.67	1	10	10	17	0.838467	17	18.7613	1.21694	17	12.7278	1.20008	17	19.9384	2.8526e+08	150	15.6935	7.25439
Q5F930	Carbonate dehydratase OS=Neisseria gonorrhoeae (strain ATCC 700825 / FA 1090) GN=NGO_0574 PE=4 SV=1 - [Q5F930_NEIG1]	155.925	58.73	1	10	10	67	1.61354	53	31.4817	1.40157	53	15.3798	2.08976	53	24.1401	1.01908e+09	252	28.0673	9.12939
Q5F9M5	Uncharacterized protein OS=Neisseria gonorrhoeae (strain ATCC 700825 / FA 1090) GN=NGO_0368 PE=4 SV=1 - [Q5F9M5_NEIG1]	42.6461	76.98	1	10	10	16	1.78699	16	53.1304	1.29262	16	9.1121	2.18641	16	44.1909	1.64556e+08	126	13.7583	9.0415
Q5F9U1	50S ribosomal protein L20 OS=Neisseria gonorrhoeae (strain ATCC 700825 / FA 1090) GN=rplT PE=3 SV=1 - [RL20_NEIG1]	67.7847	50.42	1	10	10	29	1.08339	29	12.2082	1.34769	27	13.08	1.40222	27	13.3542	1.15579e+09	119	13.6716	11.6343
Q5F9V6	LPS-assembly lipoprotein LptE OS=Neisseria gonorrhoeae (strain ATCC 700825 / FA 1090) GN=lptE PE=3 SV=1 - [Q5F9V6_NEIG1]	57.809	57.86	1	10	10	28	1.53285	26	23.8008	1.87043	26	11.9668	2.09251	26	18.5249	1.04309e+09	159	17.6402	5.35107
Q5F9X1	Cell division protein FtsN OS=Neisseria gonorrhoeae (strain ATCC 700825 / FA 1090) GN=NGO_0265 PE=4 SV=1 - [Q5F9X1_NEIG1]	22.3805	27.46	1	10	10	12	1.18533	12	24.1593	1.80545	12	15.382	2.25841	12	21.0545	1.3819e+08	346	36.9842	9.11475
Q5FAH6	Acetyl-CoA carboxylase OS=Neisseria gonorrhoeae (strain ATCC 700825 / FA 1090) GN=NGO_0044 PE=4 SV=1 - [Q5FAH6_NEIG1]	32.8774	26.93	1	10	10	15	0.869205	14	28.3596	2.08179	14	17.5272	1.57788	14	35.4613	5.26175e+07	453	49.6113	6.58057
A0A0H4ITB4	Large pilS cassette OS=Neisseria gonorrhoeae (strain ATCC 700825 / FA 1090) GN=NGO_11155 PE=4 SV=1 - [A0A0H4ITB4_NEIG1]	87.5976	30.36	4	4	9	48	14.6546	18	186.026	0.773454	16	39.039	0.985688	18	38.0824	7.17257e+08	247	26.9377	9.59814
A0A0H4IVN2	Uncharacterized protein OS=Neisseria gonorrhoeae (strain ATCC 700825 / FA 1090) GN=NGO_11165 PE=4 SV=1 - [A0A0H4IVN2_NEIG1]	50.9226	54.26	4	6	9	18	2.13041	8	71.7818	0.98539	8	19.2949	2.40941	8	71.7719	5.08812e+08	129	13.861	8.70459
Q5F520	Transporter OS=Neisseria gonorrhoeae (strain ATCC 700825 / FA 1090) GN=NGO_2119 PE=4 SV=1 - [Q5F520_NEIG1]	54.6344	45.41	1	9	9	20	1.83453	19	29.3579	1.595	19	17.9056	3.05532	19	43.1821	3.55477e+08	196	21.0402	9.89111
Q5F527	Ligand-gated channel protein OS=Neisseria gonorrhoeae (strain ATCC 700825 / FA 1090) GN=NGO_2109 PE=3 SV=1 - [Q5F527_NEIG1]	14.7157	14.83	1	9	9	9	0.997531	8	15.218	1.52724	8	21.1872	1.48076	8	19.4792	2.37914e+07	809	90.4255	9.49561
Q5F533	DNA polymerase I OS=Neisseria gonorrhoeae (strain ATCC 700825 / FA 1090) GN=NGO_2103 PE=3 SV=1 - [Q5F533_NEIG1]	17.8359	11.94	1	9	9	10	0.805801	10	14.9553	1.94458	10	30.6616	1.78961	10	29.9949	3.87318e+07	930	102.071	5.49072
Q5F5E8	Uncharacterized protein OS=Neisseria gonorrhoeae (strain ATCC 700825 / FA 1090) GN=NGO_1981 PE=4 SV=1 - [Q5F5E8_NEIG1]	44.2054	29.57	1	9	9	19	1.56704	18	29.5824	1.50918	18	12.6196	2.77698	18	26.0618	557740123	186	20.3433	9.5249
Q5F5I3	Uncharacterized protein OS=Neisseria gonorrhoeae (strain ATCC 700825 / FA 1090) GN=NGO_1942 PE=4 SV=2 - [Q5F5I3_NEIG1]	53.4858	26.71	1	9	9	22	1.94274	22	21.0482	1.66827	22	15.0423	2.17583	22	17.7915	3.74327e+08	146	16.6286	9.36377
Q5F5I8	Electron transfer flavoprotein subunit beta OS=Neisseria gonorrhoeae (strain ATCC 700825 / FA 1090) GN=NGO_1936 PE=4 SV=1 - [Q5F5I8_NEIG1]	42.9002	34.08	1	9	9	20	0.754189	16	12.0468	1.69721	16	22.0892	1.27249	16	22.2167	1.91575e+08	311	32.5723	5.14795
Q5F6L9	UDP-N-acetylmuramate--L-alanine ligase OS=Neisseria gonorrhoeae (strain ATCC 700825 / FA 1090) GN=murC PE=3 SV=2 - [MURC_NEIG1]	29.9212	19.44	1	9	9	10	0.811493	10	21.4625	1.57949	10	12.6327	1.30383	10	21.7174	6.3477e+07	468	50.1629	6.26514
Q5F6M3	Cell division protein FtsZ OS=Neisseria gonorrhoeae (strain ATCC 700825 / FA 1090) GN=ftsZ PE=3 SV=1 - [Q5F6M3_NEIG1]	28.898	28.83	1	9	9	11	0.987558	11	14.6516	1.66786	11	14.2302	1.26108	11	17.8291	1.2725e+08	392	41.485	5.021
Q5F6V3	Ethanol-active dehydrogenase/acetaldehyde-active reductase OS=Neisseria gonorrhoeae (strain ATCC 700825 / FA 1090) GN=adhP PE=3 SV=2 - [Q5F6V3_NEIG1]	68.2842	30.64	1	9	9	27	0.981617	25	23.0921	3.66103	25	41.4175	3.63141	25	42.5746	8.6105e+08	346	36.3254	5.68115
Q5F7C7	Prokaryotic membrane lipolipid attachment site family protein OS=Neisseria gonorrhoeae (strain ATCC 700825 / FA 1090) GN=NGO_1251 PE=4 SV=2 - [Q5F7C7_NEIG1]	64.3301	57.58	1	9	9	30	1.63337	27	19.6452	1.49709	27	20.5032	1.96812	27	26.1966	1239348950	165	18.6006	9.53955
Q5F7U9	Septum formation inhibitor Maf OS=Neisseria gonorrhoeae (strain ATCC 700825 / FA 1090) GN=NGO_1068 PE=4 SV=1 - [Q5F7U9_NEIG1]	31.1988	22.22	1	1	9	12	0.934746	1		1.62068	1		2.22431	1		1.07395e+08	468	50.7023	7.1665
Q5F7X2	Lipoprotein OS=Neisseria gonorrhoeae (strain ATCC 700825 / FA 1090) GN=NGO_1043 PE=4 SV=1 - [Q5F7X2_NEIG1]	35.7066	70.18	1	9	9	12	0.949915	12	18.6209	1.96414	12	20.6822	1.15473	12	20.1873	1.75685e+09	114	11.4046	4.67822
Q5F809	Membrane protein OS=Neisseria gonorrhoeae (strain ATCC 700825 / FA 1090) GN=NGO_0994 PE=1 SV=1 - [Q5F809_NEIG1]	56.1284	43.72	1	9	9	27	1.11167	27	25.158	1.66473	27	22.6887	1.1247	27	17.9725	9.02394e+08	183	18.5201	4.80518
Q5F873	Citrate synthase OS=Neisseria gonorrhoeae (strain ATCC 700825 / FA 1090) GN=gltA PE=3 SV=1 - [Q5F873_NEIG1]	34.8935	18.5	1	9	9	11	0.864308	11	18.0412	2.0324	11	8.25197	1.49018	11	16.1137	1.20673e+08	427	48.0902	6.94678
Q5F878	Succinate--CoA ligase [ADP-forming] subunit beta OS=Neisseria gonorrhoeae (strain ATCC 700825 / FA 1090) GN=sucC PE=3 SV=1 - [SUCC_NEIG1]	25.3421	25.52	1	9	9	11	0.925211	10	9.43087	3.02608	10	46.5185	3.34125	10	51.7291	6.62905e+07	388	41.2816	5.43994
Q5F8F5	Acetyl-coenzyme A carboxylase carboxyl transferase subunit alpha OS=Neisseria gonorrhoeae (strain ATCC 700825 / FA 1090) GN=accA PE=3 SV=1 - [ACCA_NEIG1]	31.4195	34.48	1	9	9	11	1.00526	11	17.2041	1.48973	11	14.2419	1.26592	11	17.4972	1.19097e+08	319	35.3983	6.96143
Q5F8M9	Protein RecA OS=Neisseria gonorrhoeae (strain ATCC 700825 / FA 1090) GN=recA PE=3 SV=1 - [RECA_NEIG1]	33.6872	32.76	1	9	9	15	0.999695	15	17.3056	1.725	15	15.0292	1.17115	15	26.8413	4.07007e+07	348	37.6193	5.19873
Q5F8S3	Ferredoxin-NADP reductase OS=Neisseria gonorrhoeae (strain ATCC 700825 / FA 1090) GN=NGO_0687 PE=4 SV=1 - [Q5F8S3_NEIG1]	33.2788	34.88	1	9	9	12	0.837843	12	24.8572	1.44576	12	20.6562	1.14567	12	21.6579	1.67924e+08	258	29.312	6.17627
Q5F8X1	Lactate dehydrogenase OS=Neisseria gonorrhoeae (strain ATCC 700825 / FA 1090) GN=lldD PE=4 SV=1 - [Q5F8X1_NEIG1]	21.7073	26.92	1	9	9	10	1.17192	9	6.93728	1.70063	9	5.16064	0.995495	9	9.03302	1.23061e+08	390	43.369	7.10791
Q5F943	Uncharacterized protein OS=Neisseria gonorrhoeae (strain ATCC 700825 / FA 1090) GN=NGO_0561 PE=4 SV=1 - [Q5F943_NEIG1]	23.174	20.16	1	9	9	9	1.03027	9	12.6645	1.55888	9	9.83147	1.48168	9	22.4488	4.83899e+07	516	57.0555	5.78271
Q5F9I1	Membrane protein OS=Neisseria gonorrhoeae (strain ATCC 700825 / FA 1090) GN=NGO_0413 PE=4 SV=1 - [Q5F9I1_NEIG1]	24.1933	38.4	1	9	9	10	1.5118	10	32.7731	1.71974	10	21.8246	2.26682	10	22.936	1.72005e+08	237	26.0635	9.01221
Q5F9J0	ADP-L-glycero-D-manno-heptose-6-epimerase OS=Neisseria gonorrhoeae (strain ATCC 700825 / FA 1090) GN=hldD PE=3 SV=1 - [HLDD_NEIG1]	26.6956	29.34	1	9	9	10	1.03802	10	9.43002	2.70445	10	17.0763	2.31463	10	37.165	4.11908e+07	334	38.3491	6.16357
Q5F9L7	Peptidyl-prolyl cis-trans isomerase OS=Neisseria gonorrhoeae (strain ATCC 700825 / FA 1090) GN=NGO_0376 PE=3 SV=1 - [Q5F9L7_NEIG1]	20.9702	64.5	1	9	9	10	0.919321	10	13.0609	1.91172	10	21.1608	1.58867	10	28.894	2.14218e+07	169	18.8684	5.24951
Q5FA25	Peptide chain release factor 3 OS=Neisseria gonorrhoeae (strain ATCC 700825 / FA 1090) GN=prfC PE=3 SV=1 - [RF3_NEIG1]	28.4371	16.76	1	9	9	11	0.83592	11	27.3336	1.54595	11	5.88769	1.42271	11	16.0561	5.4668e+07	531	59.4686	5.61768
Q5FAG0	Ribosome-binding ATPase YchF OS=Neisseria gonorrhoeae (strain ATCC 700825 / FA 1090) GN=ychF PE=3 SV=1 - [Q5FAG0_NEIG1]	25.5776	31.4	1	9	9	14	0.876492	14	26.5712	1.71625	14	27.5147	1.69817	14	20.6208	1.0578e+08	363	39.2753	4.98291
Q5FAG1	Formate--tetrahydrofolate ligase OS=Neisseria gonorrhoeae (strain ATCC 700825 / FA 1090) GN=fhs PE=3 SV=1 - [FTHS_NEIG1]	26.6349	21.15	1	9	9	11	1.02254	11	12.0803	2.06885	11	45.5166	2.21128	11	60.8016	7.71241e+07	558	59.1027	6.59521
A0A0H4IVK1	Site-determining protein OS=Neisseria gonorrhoeae (strain ATCC 700825 / FA 1090) GN=NGO_09675 PE=3 SV=1 - [A0A0H4IVK1_NEIG1]	39.9871	24.72	1	8	8	13	0.837038	13	13.8065	2.21884	13	12.2662	1.82769	13	16.6121	4.87976e+08	271	29.6085	6.13818
Q5F4Z4	ATP synthase subunit b OS=Neisseria gonorrhoeae (strain ATCC 700825 / FA 1090) GN=atpF PE=3 SV=1 - [ATPF_NEIG1]	35.6895	35.9	1	8	8	11	0.998324	11	11.1361	1.49934	11	6.26077	0.866659	11	14.5423	1.03304e+08	156	17.1281	5.71924
Q5F542	10 kDa chaperonin OS=Neisseria gonorrhoeae (strain ATCC 700825 / FA 1090) GN=groS PE=3 SV=1 - [CH10_NEIG1]	31.298	82.29	1	8	8	13	0.952976	13	28.6179	3.9637	13	32.1609	3.51101	13	35.5459	5.54223e+08	96	10.2805	6.12549
Q5F564	Glycosyl transferase family 1 OS=Neisseria gonorrhoeae (strain ATCC 700825 / FA 1090) GN=NGO_2072 PE=4 SV=1 - [Q5F564_NEIG1]	25.8635	24.5	1	8	8	11	0.967718	11	17.6588	1.5262	11	27.1645	1.35929	11	37.2237	7.32153e+07	351	39.1442	9.1001
Q5F5C7	Cell division protein OS=Neisseria gonorrhoeae (strain ATCC 700825 / FA 1090) GN=NGO_2002 PE=4 SV=1 - [Q5F5C7_NEIG1]	48.269	36.86	1	8	8	16	0.94561	16	20.0425	1.61219	16	17.4807	1.63043	16	28.0279	4.5152e+07	274	29.3753	8.32373
Q5F5I9	EtfB protein OS=Neisseria gonorrhoeae (strain ATCC 700825 / FA 1090) GN=NGO_1935 PE=4 SV=1 - [Q5F5I9_NEIG1]	30.9014	30.12	1	8	8	10	0.878913	10	12.476	1.85096	10	10.5346	1.63012	10	12.0652	1.0054e+08	249	26.9707	6.34131
Q5F5R4	50S ribosomal protein L7/L12 OS=Neisseria gonorrhoeae (strain ATCC 700825 / FA 1090) GN=rplL PE=3 SV=1 - [RL7_NEIG1]	52.6887	63.41	1	8	8	20	0.807801	20	14.7438	2.08867	20	21.1776	2.2714	20	20.6787	4.13818e+09	123	12.5567	4.7417
Q5F5S5	30S ribosomal protein S10 OS=Neisseria gonorrhoeae (strain ATCC 700825 / FA 1090) GN=rpsJ PE=3 SV=1 - [RS10_NEIG1]	29.7156	63.11	1	8	8	14	0.756341	14	12.694	1.49765	14	12.4413	1.27304	14	20.4744	8.88692e+08	103	11.7995	9.56885
Q5F5T4	50S ribosomal protein L16 OS=Neisseria gonorrhoeae (strain ATCC 700825 / FA 1090) GN=rplP PE=3 SV=1 - [RL16_NEIG1]	76.9334	60.87	1	8	8	32	0.830019	32	8.99613	1.33687	32	10.8843	1.27534	32	12.0761	823348093	138	15.5095	10.8433
Q5F5U9	30S ribosomal protein S13 OS=Neisseria gonorrhoeae (strain ATCC 700825 / FA 1090) GN=rpsM PE=3 SV=1 - [RS13_NEIG1]	85.8541	28.33	1	8	8	24	0.815188	23	13.2091	1.02428	23	10.5935	0.898957	23	14.8887	6.29011e+08	120	13.3511	10.4038
Q5F6K2	Cell division protein FtsN OS=Neisseria gonorrhoeae (strain ATCC 700825 / FA 1090) GN=NGO_1549 PE=4 SV=1 - [Q5F6K2_NEIG1]	38.4712	30.45	1	8	8	12	1.33125	12	15.713	1.41726	12	10.5263	1.41712	12	14.6478	4.8894e+07	289	31.5235	9.1001
Q5F6U0	Peptidase M24 OS=Neisseria gonorrhoeae (strain ATCC 700825 / FA 1090) GN=NGO_1456 PE=4 SV=1 - [Q5F6U0_NEIG1]	20.9768	13.21	1	8	8	10	0.981385	10	12.8297	2.62249	10	23.3562	2.66032	10	63.7786	8.48535e+07	598	64.8931	5.43994
Q5F6X1	Protein GrpE OS=Neisseria gonorrhoeae (strain ATCC 700825 / FA 1090) GN=grpE PE=3 SV=1 - [GRPE_NEIG1]	34.6943	46.35	1	8	8	18	0.833924	16	22.5835	3.425	16	59.7307	3.71944	16	63.589	3.27525e+08	192	21.3367	4.76709
Q5F7L8	ABC transporter substrate-binding protein OS=Neisseria gonorrhoeae (strain ATCC 700825 / FA 1090) GN=NGO_1152 PE=3 SV=1 - [Q5F7L8_NEIG1]	35.5757	33.96	1	8	8	14	0.981541	14	22.6026	1.5295	14	28.1461	1.03937	14	12.0652	1.05658e+08	268	28.8405	5.77002
Q5F7T8	Isocitrate dehydrogenase OS=Neisseria gonorrhoeae (strain ATCC 700825 / FA 1090) GN=NGO_1082 PE=4 SV=1 - [Q5F7T8_NEIG1]	17.8585	14.04	1	8	8	11	0.794125	11	30.828	1.61915	11	50.9919	1.48072	11	29.6121	2.42532e+07	741	79.8991	6.03662
Q5F7X4	Exopolyphosphatase OS=Neisseria gonorrhoeae (strain ATCC 700825 / FA 1090) GN=NGO_1041 PE=4 SV=1 - [Q5F7X4_NEIG1]	18.7446	16.14	1	8	8	11	0.719018	11	10.1927	1.51972	11	17.6422	1.20827	11	22.0919	1.88778e+07	502	55.7925	7.48877
Q5F8Q2	Glucose-6-phosphate 1-dehydrogenase OS=Neisseria gonorrhoeae (strain ATCC 700825 / FA 1090) GN=zwf PE=3 SV=1 - [Q5F8Q2_NEIG1]	26.7187	18.92	1	8	8	10	0.949523	10	12.2626	2.52675	10	50.1277	2.54357	10	62.3595	3.87079e+07	481	53.8556	5.42725
Q5F8R1	N-6 DNA methylase OS=Neisseria gonorrhoeae (strain ATCC 700825 / FA 1090) GN=NGO_0702 PE=4 SV=1 - [Q5F8R1_NEIG1]	15.5018	16.89	1	8	8	8	0.843501	8	17.7446	2.40054	8	16.0398	1.62533	8	34.4603	1.91784e+07	533	59.9858	5.8335
Q5F925	30S ribosomal protein S6 OS=Neisseria gonorrhoeae (strain ATCC 700825 / FA 1090) GN=rpsF PE=3 SV=1 - [RS6_NEIG1]	28.232	79.51	1	8	8	13	0.918864	13	34.4108	2.02346	13	36.9946	1.99784	13	33.2692	1.27967e+08	122	13.8522	7.21045
Q5F9D9	Succinyldiaminopimelate aminotransferase OS=Neisseria gonorrhoeae (strain ATCC 700825 / FA 1090) GN=NGO_0460 PE=4 SV=1 - [Q5F9D9_NEIG1]	36.1479	25.06	1	8	8	13	0.857431	13	10.8261	1.77934	13	14.1225	1.66151	13	15.3509	7.08839e+07	395	44.1077	6.69775
Q5F9F2	L-threonine dehydratase OS=Neisseria gonorrhoeae (strain ATCC 700825 / FA 1090) GN=ilvA PE=3 SV=1 - [Q5F9F2_NEIG1]	16.5958	17.32	1	8	8	9	0.905352	9	18.9207	2.26106	9	34.4568	2.05565	9	40.2791	2.24999e+07	508	54.9983	5.93506
Q5F9F7	Outer-membrane lipoprotein LolB OS=Neisseria gonorrhoeae (strain ATCC 700825 / FA 1090) GN=NGO_0439 PE=3 SV=1 - [Q5F9F7_NEIG1]	41.0134	47.67	1	8	8	16	1.36565	13	18.302	1.50746	13	20.6014	1.7226	13	30.3423	2.99558e+08	193	21.1747	6.31592
Q5F9J5	Adenylosuccinate synthetase OS=Neisseria gonorrhoeae (strain ATCC 700825 / FA 1090) GN=purA PE=3 SV=1 - [PURA_NEIG1]	19.5716	22.12	1	8	8	10	0.800253	10	26.9158	1.84539	10	27.6039	1.51826	10	25.139	1.51047e+08	434	45.9528	6.46826
Q5F9Y4	Clp protease ClpB OS=Neisseria gonorrhoeae (strain ATCC 700825 / FA 1090) GN=NGO_0250 PE=4 SV=1 - [Q5F9Y4_NEIG1]	51.5256	36.95	1	8	8	22	1.40561	22	23.0156	1.75363	22	15.8148	1.92424	22	18.8835	4.76685e+08	203	22.5365	8.38232
Q5FA01	Membrane protein OS=Neisseria gonorrhoeae (strain ATCC 700825 / FA 1090) GN=NGO_0233 PE=4 SV=1 - [Q5FA01_NEIG1]	28.1847	37.71	1	8	8	10	1.56188	10	12.3249	1.1082	10	7.54918	1.06551	10	11.6669	3.83675e+08	175	18.4666	9.77393
Q5FA15	Argininosuccinate lyase OS=Neisseria gonorrhoeae (strain ATCC 700825 / FA 1090) GN=argH PE=3 SV=1 - [ARLY_NEIG1]	22.1409	27.51	1	8	8	13	1.01135	11	14.1115	2.31575	13	76.5419	1.78074	13	114.55	7.2216e+07	458	51.2771	5.74463
Q5FA46	Butanediol dehydrogenase OS=Neisseria gonorrhoeae (strain ATCC 700825 / FA 1090) GN=NGO_0186 PE=3 SV=1 - [Q5FA46_NEIG1]	34.965	23.45	1	8	8	15	0.962418	14	18.6543	2.30306	14	47.9968	2.2597	14	55.0362	270072079	354	37.9088	5.87158
Q5FA60	50S ribosomal protein L19 OS=Neisseria gonorrhoeae (strain ATCC 700825 / FA 1090) GN=rplS PE=3 SV=1 - [RL19_NEIG1]	45.708	61.16	1	8	8	17	0.802154	16	25.423	1.15437	16	9.62562	1.01032	16	5.3816	3.68645e+08	121	13.7596	10.4478
Q5FAC0	S-adenosylmethionine synthase OS=Neisseria gonorrhoeae (strain ATCC 700825 / FA 1090) GN=metK PE=3 SV=2 - [METK_NEIG1]	26.7205	30.08	1	8	8	11	0.917583	11	15.6557	2.37	11	56.6005	2.31811	11	66.1674	5.9768e+07	389	41.9163	5.18604
Q5FAG6	Iron-sulfur cluster carrier protein OS=Neisseria gonorrhoeae (strain ATCC 700825 / FA 1090) GN=NGO_0056 PE=3 SV=1 - [Q5FAG6_NEIG1]	16.062	25.91	1	8	8	9	0.928229	8	16.6035	1.82334	8	23.1208	1.45228	8	22.8628	1.23577e+08	359	38.114	6.69775
Q5FAG9	Carbamoyl-phosphate synthase small chain OS=Neisseria gonorrhoeae (strain ATCC 700825 / FA 1090) GN=carA PE=3 SV=1 - [Q5FAG9_NEIG1]	19.0788	24.4	1	8	8	10	0.964305	10	8.47624	1.76619	10	30.6449	1.458	10	36.6891	3.08598e+07	377	40.5964	5.42725
Q5F525	Aminobenzoate synthetase OS=Neisseria gonorrhoeae (strain ATCC 700825 / FA 1090) GN=NGO_2112 PE=4 SV=2 - [Q5F525_NEIG1]	28.1046	16.83	1	7	7	8	0.895653	8	11.826	1.55379	8	10.9322	1.27267	8	16.2081	2.10538e+07	624	68.7638	6.23975
Q5F576	Spore cortex protein OS=Neisseria gonorrhoeae (strain ATCC 700825 / FA 1090) GN=NGO_2054 PE=4 SV=1 - [Q5F576_NEIG1]	77.405	58.89	1	7	7	36	0.989705	28	29.802	1.38542	28	22.141	1.67019	28	42.3886	1.07548e+09	90	10.4791	9.49561
Q5F5A9	Phosphoenolpyruvate carboxylase OS=Neisseria gonorrhoeae (strain ATCC 700825 / FA 1090) GN=ppc PE=3 SV=2 - [CAPP_NEIG1]	10.5079	12.22	1	7	7	10	0.918304	8	17.623	1.27736	8	19.3205	1.0978	8	12.2637	2.08647e+07	900	101.058	7.03467
Q5F5N5	Pyruvate kinase OS=Neisseria gonorrhoeae (strain ATCC 700825 / FA 1090) GN=NGO_1881 PE=3 SV=1 - [Q5F5N5_NEIG1]	24.3744	16.33	1	7	7	10	0.893741	10	17.8375	2.31347	10	47.7332	2.16624	10	80.8506	5.55403e+07	490	52.4752	5.49072
Q5F5U3	50S ribosomal protein L18 OS=Neisseria gonorrhoeae (strain ATCC 700825 / FA 1090) GN=rplR PE=3 SV=1 - [RL18_NEIG1]	42.352	58.97	1	7	7	18	0.902433	14	17.8116	0.984712	14	7.96472	0.851154	14	10.0024	1.60364e+09	117	12.7899	10.4185
Q5F5V3	50S ribosomal protein L17 OS=Neisseria gonorrhoeae (strain ATCC 700825 / FA 1090) GN=rplQ PE=3 SV=1 - [RL17_NEIG1]	33.9122	56.56	1	7	7	18	0.988223	17	13.1881	1.12765	16	10.5692	1.01011	15	13.0082	8.96431e+08	122	13.7666	11.3999
Q5F5Z8	Oligopeptidase A OS=Neisseria gonorrhoeae (strain ATCC 700825 / FA 1090) GN=NGO_1770 PE=3 SV=1 - [Q5F5Z8_NEIG1]	26.146	10.03	1	7	7	10	0.840458	8	7.3937	2.31041	8	1.6617	1.88613	8	28.7408	2.57668e+07	678	75.8574	5.64307
Q5F682	50S ribosomal protein L28 OS=Neisseria gonorrhoeae (strain ATCC 700825 / FA 1090) GN=rpmB PE=3 SV=1 - [RL28_NEIG1]	25.5071	64.94	1	7	7	12	0.792493	12	34.1084	1.46438	12	10.4399	1.19624	12	16.0964	2.4515e+08	77	8.81275	11.7075
Q5F695	2,3,4,5-tetrahydropyridine-2,6-dicarboxylate N-succinyltransferase OS=Neisseria gonorrhoeae (strain ATCC 700825 / FA 1090) GN=dapD PE=3 SV=1 - [DAPD_NEIG1]	20.1015	23.08	1	7	7	8	0.879088	8	15.5571	2.61995	8	45.9577	2.43719	8	64.9601	6.18326e+07	273	29.2872	5.5415
Q5F724	Multidrug transporter OS=Neisseria gonorrhoeae (strain ATCC 700825 / FA 1090) GN=NGO_1365 PE=3 SV=1 - [Q5F724_NEIG1]	15.7782	24.51	1	7	7	10	1.41263	8	13.7796	1.34286	8	4.363	1.0293	8	11.5693	4.07865e+07	412	42.7313	8.71924
Q5F785	UPF0237 protein NGO_1298 OS=Neisseria gonorrhoeae (strain ATCC 700825 / FA 1090) GN=NGO_1298 PE=3 SV=1 - [Q5F785_NEIG1]	16.7983	46.67	1	7	7	7	0.835093	7	15.6803	2.53866	7	24.2678	2.10672	7	12.4265	3.62701e+07	90	10.4074	5.45264
Q5F7C5	Putrescine-binding periplasmic protein OS=Neisseria gonorrhoeae (strain ATCC 700825 / FA 1090) GN=NGO_1253 PE=3 SV=2 - [Q5F7C5_NEIG1]	24.9845	20.21	1	5	7	10	1.06117	5	7.9762	1.6652	5	13.0434	1.1468	5	4.71131	5.87156e+07	381	42.5165	6.59521
Q5F7X0	Tryptophan--tRNA ligase OS=Neisseria gonorrhoeae (strain ATCC 700825 / FA 1090) GN=trpS PE=3 SV=1 - [Q5F7X0_NEIG1]	29.221	21.13	1	7	7	11	0.855304	11	4.33067	2.31572	11	14.7872	1.97781	11	41.8241	4.93573e+07	336	37.5551	5.89697
Q5F8H9	Bacterioferritin OS=Neisseria gonorrhoeae (strain ATCC 700825 / FA 1090) GN=NGO_0794 PE=3 SV=1 - [Q5F8H9_NEIG1]	82.755	49.35	1	7	7	30	0.945555	28	13.85	1.46828	28	21.9853	1.26204	28	29.1055	5.11258e+08	154	17.9658	4.81787
Q5F8W5	ATP-dependent Clp protease ATP-binding subunit ClpX OS=Neisseria gonorrhoeae (strain ATCC 700825 / FA 1090) GN=clpX PE=3 SV=1 - [CLPX_NEIG1]	23.1041	16.91	1	7	7	8	0.958822	8	19.5103	2.05317	8	34.7793	2.41505	8	36.051	6.1808e+07	414	44.8044	5.40186
Q5F9F5	Ribose-phosphate pyrophosphokinase OS=Neisseria gonorrhoeae (strain ATCC 700825 / FA 1090) GN=prs PE=3 SV=1 - [Q5F9F5_NEIG1]	34.5199	27.83	1	7	7	11	0.985848	11	21.5489	2.26248	11	35.8621	1.70882	11	47.4657	1.1086e+08	327	35.5476	5.60498
Q5FA14	UTP--glucose-1-phosphate uridylyltransferase OS=Neisseria gonorrhoeae (strain ATCC 700825 / FA 1090) GN=NGO_0220 PE=3 SV=1 - [Q5FA14_NEIG1]	20.3818	26.3	1	7	7	10	0.919092	9	12.4616	1.67461	9	20.7895	1.50759	9	13.8454	2.31952e+07	289	31.9768	6.44287
Q5FA29	Outer-membrane lipoprotein carrier protein OS=Neisseria gonorrhoeae (strain ATCC 700825 / FA 1090) GN=lolA PE=3 SV=1 - [LOLA_NEIG1]	14.3048	44.93	1	7	7	8	1.38955	8	13.8565	1.27686	8	16.133	1.26273	8	25.9074	4.9168e+07	207	22.2984	9.48096
Q5FAD1	Pilin assembly protein OS=Neisseria gonorrhoeae (strain ATCC 700825 / FA 1090) GN=NGO_0095 PE=4 SV=1 - [Q5FAD1_NEIG1]	65.6805	29.83	1	7	7	20	2.60392	20	19.3608	1.26678	20	14.975	2.65344	20	16.6753	6.13353e+08	181	20.0821	5.09717
Q5F4Y8	Glycine--tRNA ligase alpha subunit OS=Neisseria gonorrhoeae (strain ATCC 700825 / FA 1090) GN=glyQ PE=3 SV=1 - [SYGA_NEIG1]	22.1755	19.46	1	6	6	10	0.906795	9	26.8115	2.32739	9	50.6821	2.29777	9	43.8213	7.19699e+07	298	33.975	5.19873
Q5F5A5	50S ribosomal protein L13 OS=Neisseria gonorrhoeae (strain ATCC 700825 / FA 1090) GN=rplM PE=3 SV=1 - [RL13_NEIG1]	31.5611	43.36	1	6	6	15	0.771196	15	14.709	1.59038	15	30.4372	1.32175	15	27.4577	4.71502e+08	143	16.2276	9.72998
Q5F5F5	Uridylate kinase OS=Neisseria gonorrhoeae (strain ATCC 700825 / FA 1090) GN=pyrH PE=3 SV=1 - [PYRH_NEIG1]	16.786	27.2	1	6	6	6	0.876346	6	7.22534	2.77169	6	17.2201	3.04496	6	47.6915	72295753	239	25.6971	7.23975
Q5F5L0	6-phosphogluconate dehydrogenase, decarboxylating OS=Neisseria gonorrhoeae (strain ATCC 700825 / FA 1090) GN=NGO_1914 PE=3 SV=1 - [Q5F5L0_NEIG1]	24.3333	17.01	1	6	6	8	0.775932	8	15.822	2.15526	8	41.1007	1.53729	8	43.4985	3.88264e+07	482	52.6775	5.41455
Q5F5T1	30S ribosomal protein S19 OS=Neisseria gonorrhoeae (strain ATCC 700825 / FA 1090) GN=rpsS PE=3 SV=1 - [RS19_NEIG1]	22.3193	45.65	1	6	6	11	0.659998	11	10.4651	1.3315	11	4.85527	1.0619	11	6.13576	1.54486e+08	92	10.3838	10.6968
Q5F5U1	30S ribosomal protein S8 OS=Neisseria gonorrhoeae (strain ATCC 700825 / FA 1090) GN=rpsH PE=3 SV=1 - [RS8_NEIG1]	34.3797	53.08	1	6	6	13	0.784848	13	16.0667	1.26654	13	15.7764	1.11528	13	17.398	3.07719e+08	130	14.1145	9.71533
Q5F5U6	50S ribosomal protein L15 OS=Neisseria gonorrhoeae (strain ATCC 700825 / FA 1090) GN=rplO PE=3 SV=1 - [RL15_NEIG1]	25.7369	36.81	1	6	6	10	0.821453	10	13.4879	1.24219	10	22.5133	0.879482	10	26.6848	4.25965e+08	144	14.9453	11.063
Q5F605	Dihydroorotate dehydrogenase (quinone) OS=Neisseria gonorrhoeae (strain ATCC 700825 / FA 1090) GN=pyrD PE=3 SV=1 - [PYRD_NEIG1]	16.962	23.58	1	6	6	7	0.895156	7	7.25344	1.41393	7	10.0675	1.29229	7	21.2756	4.26524e+07	335	35.7991	8.77783
Q5F693	Type II secretion system protein F OS=Neisseria gonorrhoeae (strain ATCC 700825 / FA 1090) GN=NGO_1669 PE=3 SV=1 - [Q5F693_NEIG1]	15.4402	11.95	1	6	6	6	1.00454	6	8.96253	1.56311	6	11.0458	0.960805	6	20.5129	3.27214e+07	410	45.3029	9.48096
Q5F6K3	Thiol:disulfide interchange protein OS=Neisseria gonorrhoeae (strain ATCC 700825 / FA 1090) GN=NGO_1548 PE=3 SV=1 - [Q5F6K3_NEIG1]	30.6843	34.58	1	6	6	14	1.30855	11	27.2544	1.63226	11	35.725	3.10168	11	23.6774	1.19461e+08	214	23.9878	9.42236
Q5F6K7	Ribosomal RNA small subunit methyltransferase H OS=Neisseria gonorrhoeae (strain ATCC 700825 / FA 1090) GN=rsmH PE=3 SV=1 - [RSMH_NEIG1]	25.0213	26.73	1	6	6	9	0.848286	9	26.0018	1.41437	9	9.19356	1.27829	9	24.5246	5.39995e+07	318	34.8073	7.15186
Q5F6T1	Bifunctional purine biosynthesis protein PurH OS=Neisseria gonorrhoeae (strain ATCC 700825 / FA 1090) GN=purH PE=3 SV=1 - [PUR9_NEIG1]	23.7694	16.16	1	6	6	8	1.1142	7	21.9159	2.43965	7	24.6048	2.71487	7	16.0203	4.58224e+07	526	56.6529	6.26514
Q5F7D6	Imidazoleglycerol-phosphate dehydratase OS=Neisseria gonorrhoeae (strain ATCC 700825 / FA 1090) GN=hisB PE=3 SV=2 - [HIS7_NEIG1]	23.0174	23.43	1	6	6	9	0.75993	9	15.2447	1.51235	9	16.873	0.66577	9	18.332	4.44863e+07	303	33.5022	8.42627
Q5F7U0	Cytochrome C OS=Neisseria gonorrhoeae (strain ATCC 700825 / FA 1090) GN=NGO_1080 PE=4 SV=1 - [Q5F7U0_NEIG1]	40.6672	46.05	1	6	6	19	1.34458	13	9.05879	1.74932	13	10.536	1.72674	13	6.73122	3.57092e+08	152	16.0819	7.82568
Q5F7W8	Aminotransferase OS=Neisseria gonorrhoeae (strain ATCC 700825 / FA 1090) GN=NGO_1047 PE=4 SV=1 - [Q5F7W8_NEIG1]	23.2581	18.07	1	6	6	11	0.969848	11	12.5051	1.66547	11	10.0709	1.40945	11	13.1662	3.91815e+07	404	45.3963	6.99072
Q5F879	Succinate--CoA ligase [ADP-forming] subunit alpha OS=Neisseria gonorrhoeae (strain ATCC 700825 / FA 1090) GN=NGO_0912 PE=3 SV=1 - [Q5F879_NEIG1]	23.501	23.65	1	6	6	9	0.873509	9	15.9891	2.4971	9	22.7124	2.51654	9	31.7322	1.49605e+08	296	30.5298	5.87158
Q5F883	(Fe-S)-binding protein OS=Neisseria gonorrhoeae (strain ATCC 700825 / FA 1090) GN=NGO_0906 PE=4 SV=1 - [Q5F883_NEIG1]	19.8714	19.83	1	6	6	12	0.765805	12	29.981	1.31684	12	50.7356	1.23015	12	56.2899	2.1544e+07	484	53.8867	8.36768
Q5F884	Uncharacterized protein OS=Neisseria gonorrhoeae (strain ATCC 700825 / FA 1090) GN=NGO_0905 PE=4 SV=1 - [Q5F884_NEIG1]	13.792	27.47	1	6	6	8	0.877459	8	7.38417	1.64085	8	11.4955	1.44173	8	18.338	44396781	233	25.7781	5.45264
Q5F8C4	Uncharacterized protein OS=Neisseria gonorrhoeae (strain ATCC 700825 / FA 1090) GN=NGO_0861 PE=4 SV=1 - [Q5F8C4_NEIG1]	140.05	52.44	1	6	6	48	1.51973	43	25.7469	1.62464	43	23.1287	1.89759	43	33.6986	4.46975e+09	82	9.50597	9.81787
Q5F8D7	Uncharacterized protein OS=Neisseria gonorrhoeae (strain ATCC 700825 / FA 1090) GN=NGO_0845 PE=4 SV=1 - [Q5F8D7_NEIG1]	13.9471	20.74	1	6	6	6	0.921652	5	9.44112	1.71621	5	84.8958	1.73947	5	131.003	5.06103e+07	376	41.9596	4.84326
Q5F8H8	Bacterioferritin OS=Neisseria gonorrhoeae (strain ATCC 700825 / FA 1090) GN=NGO_0795 PE=3 SV=1 - [Q5F8H8_NEIG1]	18.4954	50.96	1	6	6	13	1.01766	12	12.2446	1.81083	12	30.652	1.56673	12	30.5006	1.27729e+08	157	18.0044	4.70361
Q5F8Z0	2-dehydro-3-deoxyphosphooctonate aldolase OS=Neisseria gonorrhoeae (strain ATCC 700825 / FA 1090) GN=kdsA PE=3 SV=1 - [KDSA_NEIG1]	22.7114	20	1	6	6	7	0.887429	7	7.47775	2.53629	7	10.7626	2.60017	7	19.618	6.40253e+07	280	30.4969	6.43018
Q5F923	30S ribosomal protein S18 OS=Neisseria gonorrhoeae (strain ATCC 700825 / FA 1090) GN=rpsR PE=3 SV=1 - [RS18_NEIG1]	34.8861	52.63	1	6	6	20	0.749344	20	23.5098	0.997853	20	19.0321	0.899186	20	22.1529	4.17378e+08	76	8.98691	10.2866
Q5F931	UvrABC system protein B OS=Neisseria gonorrhoeae (strain ATCC 700825 / FA 1090) GN=uvrB PE=3 SV=1 - [UVRB_NEIG1]	17.8659	9.19	1	6	6	6	0.812278	6	21.3526	1.60334	6	18.0081	1.62758	6	11.3749	1.75913e+07	675	76.8603	5.36377
Q5F9H8	Periplasmic protein OS=Neisseria gonorrhoeae (strain ATCC 700825 / FA 1090) GN=NGO_0416 PE=4 SV=1 - [Q5F9H8_NEIG1]	48.6297	36.45	1	6	6	15	1.62477	15	28.8	1.39283	15	12.6716	2.0646	15	25.8346	4.64526e+08	107	11.8038	8.00146
Q5F9J3	Adenylate kinase OS=Neisseria gonorrhoeae (strain ATCC 700825 / FA 1090) GN=adk PE=3 SV=1 - [KAD_NEIG1]	8.998	35.35	1	6	6	6	0.714461	6	13.5551	1.68725	6	6.96326	1.41418	6	4.81341	5.04745e+07	215	23.11	5.26221
Q5F9K6	GTP cyclohydrolase FolE2 OS=Neisseria gonorrhoeae (strain ATCC 700825 / FA 1090) GN=folE2 PE=1 SV=1 - [GCH4_NEIG1]	22.7811	23.74	1	6	6	8	0.935144	8	40.7799	2.22134	8	40.3765	2.18286	8	57.4227	5.10124e+07	257	28.7286	6.53662
Q5F9T6	Phenylalanine--tRNA ligase beta subunit OS=Neisseria gonorrhoeae (strain ATCC 700825 / FA 1090) GN=pheT PE=3 SV=1 - [SYFB_NEIG1]	18.2054	7.37	2	6	6	8	0.77382	8	6.12938	2.40848	8	25.1641	1.91889	8	26.2076	6.57936e+07	787	85.9344	5.31299
Q5F9V2	Uncharacterized protein OS=Neisseria gonorrhoeae (strain ATCC 700825 / FA 1090) GN=NGO_0286 PE=4 SV=1 - [Q5F9V2_NEIG1]	21.1067	19.05	1	6	6	9	0.908016	9	11.2152	1.03714	9	9.0652	0.805081	9	15.0054	7.44772e+07	294	33.2686	7.59131
Q5FAB9	Peptidase S13 OS=Neisseria gonorrhoeae (strain ATCC 700825 / FA 1090) GN=NGO_0107 PE=4 SV=1 - [Q5FAB9_NEIG1]	17.9037	14.29	1	6	6	7	1.37353	7	49.4037	1.34944	7	10.8166	1.65091	7	43.8286	2.82459e+07	469	50.4882	9.15869
Q5FAD0	Pilus assembly protein PilO OS=Neisseria gonorrhoeae (strain ATCC 700825 / FA 1090) GN=NGO_0096 PE=4 SV=1 - [Q5FAD0_NEIG1]	33.2412	38.14	1	6	6	14	0.941629	13	13.0982	1.42183	13	13.2321	0.911305	13	11.3562	1.08762e+08	215	23.3311	5.13525
Q5FAF5	Isoleucine--tRNA ligase OS=Neisseria gonorrhoeae (strain ATCC 700825 / FA 1090) GN=ileS PE=3 SV=1 - [SYI_NEIG1]	16.831	6.89	1	6	6	7	0.844885	6	16.5917	2.22282	6	39.397	2.26931	6	22.0412	2.49239e+07	929	104.158	5.89697
Q5FAF7	Tyrosine--tRNA ligase OS=Neisseria gonorrhoeae (strain ATCC 700825 / FA 1090) GN=tyrS PE=3 SV=1 - [SYY_NEIG1]	24.7122	20.65	1	6	6	8	0.785479	8	8.96965	2.41686	8	9.13616	2.35502	8	15.1015	5.53813e+07	431	47.1523	6.39209
Q5FAH1	Uncharacterized protein OS=Neisseria gonorrhoeae (strain ATCC 700825 / FA 1090) GN=NGO_0049 PE=4 SV=1 - [Q5FAH1_NEIG1]	14.8793	20.34	1	6	6	8	0.851282	8	10.5857	2.83171	8	25.3758	2.41223	8	19.1745	7.14496e+07	177	20.9736	5.40186
A0A0H4ITA9	Uncharacterized protein OS=Neisseria gonorrhoeae (strain ATCC 700825 / FA 1090) GN=NGO_11125 PE=4 SV=1 - [A0A0H4ITA9_NEIG1]	36.8623	35.87	3	2	5	15	3.46747	5	407.809	1.12909	5	17.6703	7.64531	5	298.046	5.09107e+08	92	9.98505	9.1001
A0A0H4IVG5	Uncharacterized protein OS=Neisseria gonorrhoeae (strain ATCC 700825 / FA 1090) GN=NGO_07995 PE=4 SV=1 - [A0A0H4IVG5_NEIG1]	14.599	42.19	1	4	5	5	4.95647	4	55.9289	0.989488	4	11.1713	8.09976	4	68.4859	2.50367e+07	128	13.6408	8.74854
A0A0H4IWJ8	Uncharacterized protein OS=Neisseria gonorrhoeae (strain ATCC 700825 / FA 1090) GN=NGO_11150 PE=4 SV=1 - [A0A0H4IWJ8_NEIG1]	57.2948	30.53	3	2	5	18	5.27221	9	107.427	1.29428	9	31.697	7.07776	9	55.1309	7.98555e+08	95	10.1813	9.37842
A0A0H4J5J1	Uncharacterized protein OS=Neisseria gonorrhoeae (strain ATCC 700825 / FA 1090) GN=NGO_04530 PE=4 SV=1 - [A0A0H4J5J1_NEIG1]	44.6959	24.55	1	5	5	18	1.42579	18	33.4639	1.54156	18	21.7442	1.84802	18	20.2178	1.39064e+09	110	11.7102	9.99365
Q5F5D9	GTPase Obg OS=Neisseria gonorrhoeae (strain ATCC 700825 / FA 1090) GN=obg PE=1 SV=1 - [OBG_NEIG1]	18.4156	15.89	1	5	5	7	0.920885	7	19.0168	1.71794	7	28.315	1.44298	7	22.2824	3.16503e+07	384	41.9725	5.5415
Q5F5M0	DNA-binding competence protein 2 OS=Neisseria gonorrhoeae (strain ATCC 700825 / FA 1090) GN=NGO_1304 PE=4 SV=1 - [Q5F5M0_NEIG1]	27.1744	45.36	2	5	5	8	2.32088	8	21.7913	1.80339	8	14.6127	3.9307	8	21.0944	2.01445e+08	97	10.0605	9.67139
Q5F5P6	Peptide deformylase OS=Neisseria gonorrhoeae (strain ATCC 700825 / FA 1090) GN=def PE=3 SV=1 - [DEF_NEIG1]	11.0416	32.34	1	5	5	5	0.812721	5	16.5755	2.38162	5	47.4664	1.76764	5	57.5693	5.92256e+07	167	19.059	5.87158
Q5F5P8	Ribosomal RNA small subunit methyltransferase B OS=Neisseria gonorrhoeae (strain ATCC 700825 / FA 1090) GN=NGO_1869 PE=3 SV=1 - [Q5F5P8_NEIG1]	16.7979	13.37	1	5	5	6	0.821034	6	10.6208	1.13786	6	16.1875	1.11116	6	7.94724	2.23123e+07	419	46.2871	8.32373
Q5F5S1	30S ribosomal protein S12 OS=Neisseria gonorrhoeae (strain ATCC 700825 / FA 1090) GN=rpsL PE=3 SV=1 - [RS12_NEIG1]	23.1054	27.64	1	5	5	10	0.761619	10	16.974	1.33298	10	13.8669	0.921372	10	8.82834	3.11755e+08	123	13.7275	10.7554
Q5F5T8	50S ribosomal protein L24 OS=Neisseria gonorrhoeae (strain ATCC 700825 / FA 1090) GN=rplX PE=3 SV=1 - [RL24_NEIG1]	19.1099	46.73	1	5	5	7	0.801869	7	7.15348	1.32145	7	9.49553	1.32403	7	24.2406	1.36862e+08	107	11.6006	10.5649
Q5F5U0	30S ribosomal protein S14 OS=Neisseria gonorrhoeae (strain ATCC 700825 / FA 1090) GN=rpsN PE=3 SV=1 - [RS14_NEIG1]	45.0385	36.63	1	5	5	15	0.811462	14	17.5192	1.25313	14	10.1979	1.13981	14	23.9861	7.11545e+08	101	11.5105	11.7515
Q5F5V0	30S ribosomal protein S11 OS=Neisseria gonorrhoeae (strain ATCC 700825 / FA 1090) GN=rpsK PE=3 SV=1 - [RS11_NEIG1]	26.91	36.64	1	5	5	9	0.831451	9	5.59242	1.18308	9	22.693	0.968534	9	25.636	4.28656e+08	131	13.9105	11.2534
Q5F609	DNA helicase OS=Neisseria gonorrhoeae (strain ATCC 700825 / FA 1090) GN=NGO_1757 PE=3 SV=1 - [Q5F609_NEIG1]	12.466	9.66	1	5	5	5	0.835527	5	9.75002	1.86706	5	39.9115	1.56134	5	55.4331	2.29176e+07	735	82.0651	6.65381
Q5F678	NADPH-dependent 7-cyano-7-deazaguanine reductase OS=Neisseria gonorrhoeae (strain ATCC 700825 / FA 1090) GN=queF PE=3 SV=1 - [QUEF_NEIG1]	17.3565	33.12	1	5	5	7	0.941216	7	19.1545	1.53233	7	69.5656	1.53661	7	76.3352	1.37423e+08	157	17.9869	6.01123
Q5F696	Enoyl-[acyl-carrier-protein] reductase [NADH] OS=Neisseria gonorrhoeae (strain ATCC 700825 / FA 1090) GN=NGO_1666 PE=3 SV=1 - [Q5F696_NEIG1]	9.53358	22.99	1	5	5	5	0.914006	5	8.19977	1.82537	5	35.4148	1.55352	5	55.7582	5.21952e+07	261	27.6732	6.13818
Q5F6F3	Lipopolysaccharide export system protein LptA OS=Neisseria gonorrhoeae (strain ATCC 700825 / FA 1090) GN=lptA PE=3 SV=1 - [Q5F6F3_NEIG1]	20.8402	36.93	1	5	5	11	1.26199	9	28.106	2.18302	9	32.3931	2.27132	9	35.9424	1.03502e+08	176	18.3326	10.0522
Q5F6P1	Pyridoxine 5'-phosphate synthase OS=Neisseria gonorrhoeae (strain ATCC 700825 / FA 1090) GN=pdxJ PE=3 SV=1 - [PDXJ_NEIG1]	17.6676	25.62	1	4	5	6	0.979242	5	22.15	1.55078	5	38.7629	1.32942	5	18.2473	1.16369e+08	242	26.549	5.89697
Q5F6P5	DNA methylase OS=Neisseria gonorrhoeae (strain ATCC 700825 / FA 1090) GN=NGO_1504 PE=3 SV=1 - [Q5F6P5_NEIG1]	11.293	12.63	1	5	5	5	0.838162	5	20.3187	1.55132	5	34.749	1.26805	5	40.9884	1.76958e+07	380	42.2677	9.31982
Q5F6Q6	30S ribosomal protein S20 OS=Neisseria gonorrhoeae (strain ATCC 700825 / FA 1090) GN=rpsT PE=3 SV=1 - [RS20_NEIG1]	26.0142	40.23	1	5	5	10	0.720394	10	41.2308	1.11941	10	23.4663	0.837191	10	22.4202	1.43318e+09	87	9.50235	11.561
Q5F746	Phosphoglucosamine mutase OS=Neisseria gonorrhoeae (strain ATCC 700825 / FA 1090) GN=glmM PE=3 SV=1 - [GLMM_NEIG1]	15.4706	13.71	1	5	5	6	0.949412	6	7.05749	2.51599	6	27.4248	2.68964	6	27.8156	2.21395e+07	445	47.9235	5.94775
Q5F771	Protease OS=Neisseria gonorrhoeae (strain ATCC 700825 / FA 1090) GN=NGO_1314 PE=4 SV=1 - [Q5F771_NEIG1]	17.1352	13.97	1	5	5	5	0.961814	5	8.57561	2.27812	5	41.5258	2.1344	5	38.8326	5.52464e+08	451	50.7766	6.37939
Q5F7B9	DNA topoisomerase 4 subunit A OS=Neisseria gonorrhoeae (strain ATCC 700825 / FA 1090) GN=parC PE=3 SV=1 - [Q5F7B9_NEIG1]	15.3051	9.26	1	5	5	5	0.942896	5	16.659	2.18052	5	15.3449	1.7349	5	15.0346	2.07071e+07	767	84.4045	8.49951
Q5F7V4	Membrane-bound lysozyme-inhibitor of c-type lysozyme family protein OS=Neisseria gonorrhoeae (strain ATCC 700825 / FA 1090) GN=NGO_1063 PE=4 SV=1 - [Q5F7V4_NEIG1]	91.7191	42.06	1	5	5	42	1.63844	33	33.1843	1.82695	33	27.6346	2.16373	33	26.6741	9.25544e+09	126	13.4755	6.53662
Q5F7W6	Phosphoribosylglycinamide formyltransferase OS=Neisseria gonorrhoeae (strain ATCC 700825 / FA 1090) GN=NGO_1049 PE=4 SV=1 - [Q5F7W6_NEIG1]	12.6065	27.61	1	5	5	6	1.54193	6	33.9407	1.80215	6	19.1123	2.265	6	39.3805	1.22028e+08	268	30.1152	8.33838
Q5F7Y0	Single-stranded DNA-binding protein OS=Neisseria gonorrhoeae (strain ATCC 700825 / FA 1090) GN=NGO_1031 PE=3 SV=1 - [Q5F7Y0_NEIG1]	21.2288	36.78	1	5	5	6	0.86807	6	7.58971	2.79124	6	21.3564	3.32274	6	20.9329	5.72354e+07	174	19.4366	6.04932
Q5F849	4-hydroxy-tetrahydrodipicolinate synthase OS=Neisseria gonorrhoeae (strain ATCC 700825 / FA 1090) GN=dapA PE=3 SV=1 - [DAPA_NEIG1]	24.7302	30.93	1	5	5	9	1.13569	9	21.7747	2.23052	9	38.6329	2.0615	9	62.2604	5.23809e+07	291	30.7318	5.94775
Q5F8E5	Short-chain dehydrogenase OS=Neisseria gonorrhoeae (strain ATCC 700825 / FA 1090) GN=NGO_0832 PE=4 SV=1 - [Q5F8E5_NEIG1]	11.5694	27.62	1	5	5	6	0.742686	6	25.2904	1.7397	6	18.9462	1.48108	6	32.2376	3.29228e+07	239	25.9633	6.40479
Q5F8T3	3-isopropylmalate dehydratase small subunit OS=Neisseria gonorrhoeae (strain ATCC 700825 / FA 1090) GN=leuD PE=3 SV=1 - [LEUD_NEIG1]	19.8206	28.17	1	5	5	6	0.992581	6	21.3046	1.69026	6	16.2857	1.28082	6	28.2661	4.75237e+07	213	24.1933	6.40479
Q5F926	Thioredoxin reductase OS=Neisseria gonorrhoeae (strain ATCC 700825 / FA 1090) GN=NGO_0580 PE=3 SV=1 - [Q5F926_NEIG1]	23.6554	16.77	1	5	5	10	0.790555	10	19.8572	2.68751	10	31.2322	2.28667	10	24.6085	9.83511e+07	316	33.633	5.31299
Q5F9D8	UPF0246 protein NGO0461 OS=Neisseria gonorrhoeae (strain ATCC 700825 / FA 1090) GN=NGO0461 PE=3 SV=1 - [Y461_NEIG1]	5.11823	16.6	1	5	5	5	0.882556	5	3.29087	2.23844	5	5.10233	1.92164	5	11.5202	2.43572e+07	259	29.6111	6.94678
Q5F9E4	Pilus assembly protein PilW OS=Neisseria gonorrhoeae (strain ATCC 700825 / FA 1090) GN=NGO_0454 PE=4 SV=1 - [Q5F9E4_NEIG1]	14.8384	17.79	1	5	5	5	1.66192	5	21.8318	1.29373	5	4.53271	1.80236	5	16.89	2.54794e+07	326	35.9266	9.23193
Q5F9G8	Histidine--tRNA ligase OS=Neisseria gonorrhoeae (strain ATCC 700825 / FA 1090) GN=hisS PE=3 SV=1 - [SYH_NEIG1]	15.915	12.3	1	5	5	6	0.934365	6	10.298	1.70244	6	14.936	1.68173	6	16.6388	2.51417e+07	431	48.3113	5.66846
Q5F9N3	Uroporphyrin-III methyltransferase OS=Neisseria gonorrhoeae (strain ATCC 700825 / FA 1090) GN=NGO_0360 PE=4 SV=2 - [Q5F9N3_NEIG1]	13.2788	10.59	1	5	5	5	1.10011	5	10.7752	1.56597	5	11.9869	1.22717	5	19.0132	5.35242e+07	444	48.326	5.23682
Q5F9P0	Uracil phosphoribosyltransferase OS=Neisseria gonorrhoeae (strain ATCC 700825 / FA 1090) GN=upp PE=3 SV=1 - [UPP_NEIG1]	36.1445	35.58	1	5	5	13	0.832771	11	16.0813	2.20001	11	25.6688	1.80135	11	18.8811	1.01591e+08	208	22.863	5.69385
Q5F9Q0	Signal peptidase I OS=Neisseria gonorrhoeae (strain ATCC 700825 / FA 1090) GN=NGO_0343 PE=3 SV=1 - [Q5F9Q0_NEIG1]	15.6406	20.35	1	5	5	8	1.16485	8	8.43193	1.39124	8	6.27949	1.05364	8	27.7114	3.87042e+07	339	37.5489	6.25244
Q5F9R4	D-alanyl-D-alanine endopeptidase OS=Neisseria gonorrhoeae (strain ATCC 700825 / FA 1090) GN=NGO_0327 PE=3 SV=1 - [Q5F9R4_NEIG1]	7.66317	19.87	1	5	5	5	1.25985	5	43.2772	1.605	5	16.6848	1.50662	5	92.9753	4.39495e+07	312	34.1306	9.48096
Q5F9W3	Tryptophan synthase beta chain OS=Neisseria gonorrhoeae (strain ATCC 700825 / FA 1090) GN=trpB PE=3 SV=1 - [TRPB_NEIG1]	15.2483	16.75	1	5	5	7	0.860033	6	5.03766	2.46594	7	18.8534	1.78502	7	50.7673	2.84816e+07	400	43.4318	6.17627
Q5F9Y0	N utilization substance protein B homolog OS=Neisseria gonorrhoeae (strain ATCC 700825 / FA 1090) GN=nusB PE=3 SV=1 - [NUSB_NEIG1]	19.3559	35.46	1	5	5	7	0.730448	7	9.61128	1.70806	7	5.16223	1.31956	7	4.71553	4.80206e+07	141	15.9874	8.1333
Q5F9Y6	Tryptophan synthase alpha chain OS=Neisseria gonorrhoeae (strain ATCC 700825 / FA 1090) GN=trpA PE=3 SV=1 - [TRPA_NEIG1]	10.6265	22.61	1	5	5	5	0.837886	5	10.2674	1.64813	5	55.05	1.38452	5	59.8756	5.38606e+08	261	27.9747	5.18604
Q5F9Z1	Uncharacterized protein OS=Neisseria gonorrhoeae (strain ATCC 700825 / FA 1090) GN=NGO_0243 PE=4 SV=1 - [Q5F9Z1_NEIG1]	18.8488	31.64	1	5	5	11	2.53963	9	8.63009	1.75047	9	8.30928	3.02796	9	14.052	1.9231e+08	177	19.6973	7.95752
Q5FAC9	Pilus assembly protein PilP OS=Neisseria gonorrhoeae (strain ATCC 700825 / FA 1090) GN=NGO_0097 PE=4 SV=1 - [Q5FAC9_NEIG1]	6.04368	31.16	1	5	5	6	1.09174	5	26.1265	1.52587	5	35.8638	1.17596	5	40.2482	6.09617e+07	199	22.2417	9.15869
Q5F4W2	50S ribosomal protein L34 OS=Neisseria gonorrhoeae (strain ATCC 700825 / FA 1090) GN=rpmH PE=3 SV=1 - [RL34_NEIG1]	10.3308	50	1	4	4	4	0.846124	4	7.05373	1.28241	4	5.47081	1.16062	4	8.82733	2.78287e+08	44	5.04799	12.6011
Q5F4X5	3-oxoacyl-[acyl-carrier-protein] synthase 3 OS=Neisseria gonorrhoeae (strain ATCC 700825 / FA 1090) GN=fabH PE=3 SV=1 - [FABH_NEIG1]	10.9878	11.56	1	4	4	4	0.815564	4	27.9121	2.4837	4	28.322	2.13854	4	35.7696	3.73737e+07	320	33.9805	6.69775
Q5F4X7	Malonyl CoA-acyl carrier protein transacylase OS=Neisseria gonorrhoeae (strain ATCC 700825 / FA 1090) GN=NGO_2166 PE=3 SV=1 - [Q5F4X7_NEIG1]	16.1664	12.99	1	4	4	5	0.876228	5	11.8505	1.69128	5	9.42443	1.55657	5	19.1114	9.10429e+07	308	32.0094	5.33838
Q5F4Y2	Inositol monophosphatase OS=Neisseria gonorrhoeae (strain ATCC 700825 / FA 1090) GN=NGO_2161 PE=4 SV=1 - [Q5F4Y2_NEIG1]	9.5665	13.26	1	4	4	4	0.824375	4	21.1209	1.2269	4	10.7488	1.0031	4	5.16449	2.81174e+07	264	29.4169	7.02002
Q5F4Y4	Lacto-N-neotetraose biosynthesis glycosyl transferase OS=Neisseria gonorrhoeae (strain ATCC 700825 / FA 1090) GN=NGO_2159 PE=4 SV=1 - [Q5F4Y4_NEIG1]	11.5326	15.36	1	2	4	9	0.835185	2	13.7918	1.39102	2	3.0851	1.27972	2	9.04451	4.95933e+07	280	32.4117	8.49951
Q5F4Y6	Lacto-N-neotetraose biosynthesis glycosyl transferase OS=Neisseria gonorrhoeae (strain ATCC 700825 / FA 1090) GN=NGO_2156 PE=4 SV=1 - [Q5F4Y6_NEIG1]	16.612	17.2	1	2	4	9	0.831109	2	0.06342	1.4378	2	37.0236	1.12391	2	19.9096	5.43342e+07	279	31.7761	6.75635
Q5F4Z3	ATP synthase subunit delta OS=Neisseria gonorrhoeae (strain ATCC 700825 / FA 1090) GN=atpH PE=3 SV=1 - [ATPD_NEIG1]	10.6278	23.73	1	4	4	4	1.06637	4	8.43486	2.27533	4	4.48527	1.58473	4	7.36843	2.06036e+07	177	19.4854	5.09717
Q5F510	Stringent starvation protein A OS=Neisseria gonorrhoeae (strain ATCC 700825 / FA 1090) GN=NGO_2130 PE=3 SV=1 - [Q5F510_NEIG1]	9.00827	25.87	1	4	4	5	0.814392	5	2.05774	1.48906	5	25.402	1.10225	5	25.7417	3.77282e+07	201	23.1499	6.69775
Q5F5A4	30S ribosomal protein S9 OS=Neisseria gonorrhoeae (strain ATCC 700825 / FA 1090) GN=rpsI PE=3 SV=1 - [RS9_NEIG1]	38.638	46.92	1	4	4	13	0.860828	12	12.9496	1.20902	12	7.54303	1.05729	12	16.3403	1.7233e+08	130	14.3708	10.9458
Q5F5B6	Glutamine ABC transporter ATP-binding protein OS=Neisseria gonorrhoeae (strain ATCC 700825 / FA 1090) GN=NGO_2013 PE=4 SV=1 - [Q5F5B6_NEIG1]	11.982	16.46	1	4	4	4	0.667609	4	4.70963	1.07195	4	17.4926	0.801706	4	23.3294	3.27224e+07	243	26.767	5.94775
Q5F5E5	Periplasmic protein OS=Neisseria gonorrhoeae (strain ATCC 700825 / FA 1090) GN=NGO_1984 PE=4 SV=1 - [Q5F5E5_NEIG1]	2.53076	21.3	1	4	4	4	0.982141	4	20.2165	1.70294	4	10.7489	1.89334	4	24.1608	9.10745e+06	216	23.26	8.55811
Q5F5E7	XRE family transcriptional regulator OS=Neisseria gonorrhoeae (strain ATCC 700825 / FA 1090) GN=NGO_1982 PE=4 SV=1 - [Q5F5E7_NEIG1]	8.76593	40.4	1	4	4	4	0.946069	4	4.40395	1.4276	4	10.6848	1.36889	4	14.2619	3.80845e+07	99	11.4292	9.80322
Q5F5J8	Glutamate--tRNA ligase OS=Neisseria gonorrhoeae (strain ATCC 700825 / FA 1090) GN=gltX PE=3 SV=1 - [SYE_NEIG1]	8.47985	10.78	1	4	4	6	0.802166	6	31.1432	1.4965	6	26.4826	1.05297	6	62.768	2.86285e+07	464	52.2959	5.90967
Q5F5K6	UDP-N-acetylglucosamine 1-carboxyvinyltransferase OS=Neisseria gonorrhoeae (strain ATCC 700825 / FA 1090) GN=murA PE=3 SV=1 - [MURA_NEIG1]	20.6422	10.31	1	4	4	6	0.739393	6	15.0222	1.69948	6	17.599	1.48534	6	27.1479	5.70336e+07	417	43.7917	5.93506
Q5F5P9	Uncharacterized protein OS=Neisseria gonorrhoeae (strain ATCC 700825 / FA 1090) GN=NGO_1868 PE=4 SV=1 - [Q5F5P9_NEIG1]	14.635	25.13	1	4	4	5	1.29137	5	26.3654	1.77233	5	3.1028	1.91287	5	48.1913	7.28332e+07	199	21.8987	9.70068
Q5F5V5	Cell division topological specificity factor OS=Neisseria gonorrhoeae (strain ATCC 700825 / FA 1090) GN=minE PE=3 SV=1 - [MINE_NEIG1]	16.3599	39.08	1	4	4	5	0.832376	5	10.552	0.9947	5	8.85168	0.86373	5	8.30712	1.11508e+08	87	10.0344	6.75635
Q5F5X8	Chromosome partitioning protein OS=Neisseria gonorrhoeae (strain ATCC 700825 / FA 1090) GN=NGO_1790 PE=4 SV=1 - [Q5F5X8_NEIG1]	15.3283	23.35	1	4	4	4	0.727819	4	2.78101	1.22638	4	17.4057	0.802445	4	17.8303	8.49396e+06	257	27.0033	6.0874
Q5F614	Membrane protein OS=Neisseria gonorrhoeae (strain ATCC 700825 / FA 1090) GN=NGO_1752 PE=4 SV=2 - [Q5F614_NEIG1]	8.10565	10.56	1	4	4	4	0.994512	4	36.3635	1.24066	4	25.6666	0.978246	4	33.4396	3.00772e+07	483	53.4471	8.80713
Q5F633	Putative ribosome biogenesis GTPase RsgA OS=Neisseria gonorrhoeae (strain ATCC 700825 / FA 1090) GN=rsgA PE=3 SV=1 - [RSGA_NEIG1]	9.62624	15.31	1	4	4	4	0.786961	4	6.70037	1.4608	4	18.8212	1.10332	4	10.0541	79764482	307	33.4873	7.04932
Q5F645	Indole-3-glycerol phosphate synthase OS=Neisseria gonorrhoeae (strain ATCC 700825 / FA 1090) GN=trpC PE=3 SV=1 - [TRPC_NEIG1]	10.8023	16.92	1	4	4	5	0.727187	5	8.40202	2.00422	5	13.1837	1.54475	5	38.4068	2.02452e+07	260	28.6041	5.70654
Q5F668	Phospho-2-dehydro-3-deoxyheptonate aldolase OS=Neisseria gonorrhoeae (strain ATCC 700825 / FA 1090) GN=NGO_1695 PE=3 SV=1 - [Q5F668_NEIG1]	17.6223	12.25	1	4	4	9	0.739387	9	18.6353	1.67935	9	50.2213	1.28338	9	63.3386	5.08493e+07	351	38.6307	6.771
Q5F6J5	Membrane protein OS=Neisseria gonorrhoeae (strain ATCC 700825 / FA 1090) GN=NGO_1559 PE=3 SV=1 - [Q5F6J5_NEIG1]	59.0456	24.44	1	4	4	15	1.47632	15	13.4573	1.49817	15	15.718	2.02856	15	30.8444	5.4714e+08	225	23.3967	9.17334
Q5F6L0	UDP-N-acetylmuramoyl-L-alanyl-D-glutamate--2,6-diaminopimelate ligase OS=Neisseria gonorrhoeae (strain ATCC 700825 / FA 1090) GN=murE PE=3 SV=1 - [Q5F6L0_NEIG1]	8.87069	11.18	1	4	4	4	0.777531	4	18.1394	1.56165	4	8.63154	1.19194	4	18.945	1.65886e+07	492	52.9767	6.59521
Q5F716	Cbb3-type cytochrome c oxidase subunit II OS=Neisseria gonorrhoeae (strain ATCC 700825 / FA 1090) GN=NGO_1373 PE=4 SV=1 - [Q5F716_NEIG1]	20.6239	30.54	1	4	4	9	1.08306	8	4.01228	1.39379	8	6.25111	0.989684	8	8.40066	4.25193e+07	203	22.5148	8.38232
Q5F765	Uncharacterized protein OS=Neisseria gonorrhoeae (strain ATCC 700825 / FA 1090) GN=NGO_1321 PE=4 SV=1 - [Q5F765_NEIG1]	28.2363	24.42	1	4	4	9	1.39569	9	43.8349	1.56778	9	26.1174	1.84434	9	52.4313	2.4304e+08	172	18.7884	5.2749
Q5F7C0	2,3-bisphosphoglycerate-dependent phosphoglycerate mutase OS=Neisseria gonorrhoeae (strain ATCC 700825 / FA 1090) GN=gpmA PE=3 SV=1 - [GPMA_NEIG1]	11.0065	33.48	1	4	4	6	0.924518	6	20.9573	2.37369	6	18.3824	1.87466	6	20.7954	1.33447e+07	227	25.9126	6.55127
Q5F7E3	Acetolactate synthase OS=Neisseria gonorrhoeae (strain ATCC 700825 / FA 1090) GN=NGO_1235 PE=4 SV=1 - [Q5F7E3_NEIG1]	11.5954	24.54	1	4	4	5	0.798262	5	19.1447	2.33751	5	14.0403	1.98242	5	8.35587	8.23923e+07	163	18.2818	5.69385
Q5F7X8	Transglycosylase OS=Neisseria gonorrhoeae (strain ATCC 700825 / FA 1090) GN=NGO_1033 PE=4 SV=1 - [Q5F7X8_NEIG1]	3.06316	20.77	1	4	4	4	1.00553	4	4.90881	1.56315	4	11.3208	1.52771	4	12.4895	1.84598e+07	207	23.3603	10.4185
Q5F870	Succinate dehydrogenase flavoprotein subunit OS=Neisseria gonorrhoeae (strain ATCC 700825 / FA 1090) GN=NGO_0921 PE=3 SV=1 - [Q5F870_NEIG1]	11.5691	8.86	1	4	4	4	1.01249	4	0.991254	1.76082	4	38.7284	1.63835	4	21.98	3.3485e+07	587	64.4083	6.23975
Q5F8C0	Serine hydroxymethyltransferase OS=Neisseria gonorrhoeae (strain ATCC 700825 / FA 1090) GN=glyA PE=3 SV=1 - [GLYA_NEIG1]	13.3444	9.86	1	4	4	5	0.710591	5	9.34003	1.71872	5	15.6711	1.38685	5	6.98395	5.52275e+07	416	44.9619	6.66846
Q5F8C3	Fructose-1,6-bisphosphatase class 1 OS=Neisseria gonorrhoeae (strain ATCC 700825 / FA 1090) GN=fbp PE=3 SV=1 - [F16PA_NEIG1]	19.019	15.43	1	4	4	7	0.881502	7	36.7924	2.03041	7	78.3447	2.09901	7	39.5084	4.19117e+07	324	35.4511	5.37646
Q5F8F9	Uncharacterized protein OS=Neisseria gonorrhoeae (strain ATCC 700825 / FA 1090) GN=NGO_0816 PE=4 SV=1 - [Q5F8F9_NEIG1]	23.2959	33.66	1	4	4	6	3.31785	6	52.5405	1.14241	6	5.23985	3.55465	6	45.0391	7.62258e+07	101	10.8073	8.48486
Q5F8H2	Ribonuclease R OS=Neisseria gonorrhoeae (strain ATCC 700825 / FA 1090) GN=rnr PE=3 SV=1 - [Q5F8H2_NEIG1]	8.97479	5.94	1	4	4	4	0.952484	4	10.7371	1.6863	4	10.3074	1.51724	4	7.01871	1.50365e+07	791	88.9963	9.05615
Q5F8M3	Tetratricopeptide repeat family protein OS=Neisseria gonorrhoeae (strain ATCC 700825 / FA 1090) GN=NGO_0747 PE=4 SV=1 - [Q5F8M3_NEIG1]	12.0987	20.25	1	4	4	4	1.35878	4	21.3846	1.38549	4	8.64073	2.15111	4	3.14813	2.32568e+07	237	26.1465	9.49561
Q5F8P9	Transcriptional regulator OS=Neisseria gonorrhoeae (strain ATCC 700825 / FA 1090) GN=NGO_0718 PE=4 SV=1 - [Q5F8P9_NEIG1]	6.58984	16.31	1	4	4	4	0.885239	4	14.7995	1.66133	4	18.7526	1.21409	4	4.74196	7.06944e+07	282	30.3627	5.49072
Q5F8S1	Threonine synthase OS=Neisseria gonorrhoeae (strain ATCC 700825 / FA 1090) GN=NGO_0689 PE=4 SV=1 - [Q5F8S1_NEIG1]	8.63228	12.58	1	4	4	4	1.01073	4	10.3738	1.56792	4	13.5884	1.3879	4	19.8478	1.44354e+07	469	51.4459	5.66846
Q5F901	Murein transglycosylase OS=Neisseria gonorrhoeae (strain ATCC 700825 / FA 1090) GN=NGO_0608 PE=4 SV=1 - [Q5F901_NEIG1]	7.91758	7.29	1	4	4	4	1.57065	4	23.635	1.7516	4	29.1614	2.31642	4	61.1852	2.36187e+07	658	72.0444	9.36377
Q5F945	Uncharacterized protein OS=Neisseria gonorrhoeae (strain ATCC 700825 / FA 1090) GN=NGO_0558 PE=3 SV=1 - [Q5F945_NEIG1]	12.1082	30.65	1	4	4	4	1.17456	4	20.4817	1.60078	4	28.6849	1.79909	4	9.7238	3.28573e+07	186	20.2483	8.67529
Q5F958	Type III restriction endonuclease subunit M OS=Neisseria gonorrhoeae (strain ATCC 700825 / FA 1090) GN=NGO_0545 PE=4 SV=1 - [Q5F958_NEIG1]	10.5054	7.57	1	4	4	4	0.692458	4	25.457	2.16671	4	30.9562	1.41359	4	38.1898	1.99849e+07	687	77.4349	5.2749
Q5F967	GDSL-like lipase/acylhydrolase family protein OS=Neisseria gonorrhoeae (strain ATCC 700825 / FA 1090) GN=NGO_0532 PE=4 SV=1 - [Q5F967_NEIG1]	16.0813	12.59	1	4	4	8	1.76262	8	53.9461	1.23315	8	29.473	1.81274	8	49.8449	3.39235e+07	397	42.5644	8.39697
Q5F969	Long-chain fatty acid--CoA ligase OS=Neisseria gonorrhoeae (strain ATCC 700825 / FA 1090) GN=NGO_0530 PE=4 SV=1 - [Q5F969_NEIG1]	11.1866	6.38	1	4	4	4	0.941148	4	17.5099	1.54624	4	9.37189	1.43548	4	20.4313	2.57087e+07	517	57.4164	9.12939
Q5F973	Phosphoribosylformylglycinamidine cyclo-ligase OS=Neisseria gonorrhoeae (strain ATCC 700825 / FA 1090) GN=purM PE=3 SV=1 - [PUR5_NEIG1]	16.2949	15.7	1	4	4	5	0.764071	5	24.307	1.94465	5	22.0054	1.33809	5	10.4166	1.6925e+07	344	36.8749	5.0083
Q5F9E2	Type IV pilin OS=Neisseria gonorrhoeae (strain ATCC 700825 / FA 1090) GN=NGO_0456 PE=4 SV=1 - [Q5F9E2_NEIG1]	8.70281	26.54	1	4	4	7	1.48647	5	23.3138	1.63667	5	4.48267	1.54302	5	6.29886	8.32099e+07	162	18.0712	9.30518
Q5F9E3	Pilus assembly protein PilX OS=Neisseria gonorrhoeae (strain ATCC 700825 / FA 1090) GN=NGO_0455 PE=4 SV=1 - [Q5F9E3_NEIG1]	30.5125	13.79	1	4	4	9	1.71198	9	18.6714	1.4485	9	13.3888	1.50179	9	20.1868	4.36326e+07	203	21.9531	8.11865
Q5F9F8	Pantothenate synthetase OS=Neisseria gonorrhoeae (strain ATCC 700825 / FA 1090) GN=panC PE=3 SV=1 - [PANC_NEIG1]	11.5386	21.22	1	4	4	4	0.82691	4	11.8054	1.32368	4	16.0219	1.10365	4	22.138	1.35948e+07	278	30.9813	6.56592
Q5F9H9	Poly(A) polymerase I OS=Neisseria gonorrhoeae (strain ATCC 700825 / FA 1090) GN=pcnB PE=3 SV=1 - [Q5F9H9_NEIG1]	14.3251	13.05	1	4	4	5	1.16215	5	33.624	1.7281	5	4.5961	1.43351	5	13.579	2.1351e+07	452	51.3748	9.80322
Q5F9I9	Restriction endonuclease, M subunit OS=Neisseria gonorrhoeae (strain ATCC 700825 / FA 1090) GN=NGO_0404 PE=4 SV=1 - [Q5F9I9_NEIG1]	11.4066	7.39	1	4	4	4	0.88849	4	15.4614	2.4313	4	4.88219	2.37217	4	5.76672	1.12247e+07	514	57.444	5.13525
Q5F9J4	Protease HtpX homolog OS=Neisseria gonorrhoeae (strain ATCC 700825 / FA 1090) GN=htpX PE=3 SV=1 - [HTPX_NEIG1]	12.9124	16.49	1	4	4	4	1.27439	4	3.44136	1.5107	4	9.13652	0.81691	4	3.93245	6.11877e+07	279	30.1529	7.63525
Q5F9K3	NAD kinase OS=Neisseria gonorrhoeae (strain ATCC 700825 / FA 1090) GN=nadK PE=3 SV=1 - [NADK_NEIG1]	17.9156	15.2	1	4	4	5	0.873957	5	6.9571	1.42553	5	4.90178	1.33556	5	12.5203	3.26197e+07	296	32.8549	5.89697
Q5F9K7	Cystathionine gamma-synthase OS=Neisseria gonorrhoeae (strain ATCC 700825 / FA 1090) GN=NGO_0386 PE=3 SV=1 - [Q5F9K7_NEIG1]	20.7188	14.29	1	4	4	7	0.848818	7	18.6	2.02761	7	11.458	2.18124	7	16.6126	3.58904e+07	385	42.2274	6.48096
Q5F9L4	Peptidyl-tRNA hydrolase OS=Neisseria gonorrhoeae (strain ATCC 700825 / FA 1090) GN=pth PE=3 SV=1 - [PTH_NEIG1]	10.4135	26.04	1	4	4	4	0.933835	4	13.0539	2.31634	4	27.1978	2.0422	4	50.9277	3.07626e+07	192	21.4322	9.21729
Q5F9M4	Phage-shock protein OS=Neisseria gonorrhoeae (strain ATCC 700825 / FA 1090) GN=NGO_0369 PE=4 SV=2 - [Q5F9M4_NEIG1]	20.2975	42.86	1	4	4	8	1.67336	8	28.8461	1.32574	8	2.15943	1.9677	8	33.7907	1.52682e+07	119	12.9767	8.70459
Q5F9N1	Uroporphyrinogen decarboxylase OS=Neisseria gonorrhoeae (strain ATCC 700825 / FA 1090) GN=hemE PE=3 SV=1 - [DCUP_NEIG1]	27.1364	10.73	1	4	4	9	0.785156	9	5.45494	1.46961	9	18.4386	1.29428	9	8.34104	5.02753e+07	354	38.9921	7.26904
Q5F9R5	RNA-binding protein Hfq OS=Neisseria gonorrhoeae (strain ATCC 700825 / FA 1090) GN=hfq PE=3 SV=1 - [HFQ_NEIG1]	10.9182	74.23	1	4	4	8	0.73792	4	9.38888	2.09149	5	56.8426	1.41542	5	40.8458	2.97633e+07	97	10.7767	8.52881
Q5F9U2	50S ribosomal protein L35 OS=Neisseria gonorrhoeae (strain ATCC 700825 / FA 1090) GN=rpmI PE=3 SV=1 - [RL35_NEIG1]	14.9911	36.92	1	4	4	6	0.828804	6	22.2453	1.35264	6	14.8389	1.26797	6	12.0957	1.63288e+08	65	7.35213	11.7661
Q5F9W6	Uncharacterized protein OS=Neisseria gonorrhoeae (strain ATCC 700825 / FA 1090) GN=NGO_0270 PE=4 SV=1 - [Q5F9W6_NEIG1]	7.16338	23.18	1	4	4	7	2.41585	7	11.6323	1.61569	7	7.19031	2.9929	7	8.52246	1.28812e+08	151	17.3995	8.22119
Q5F9W7	Amino acid ABC transporter ATPase OS=Neisseria gonorrhoeae (strain ATCC 700825 / FA 1090) GN=NGO_0269 PE=4 SV=1 - [Q5F9W7_NEIG1]	7.81477	11.98	1	4	4	4	0.802505	4	19.8367	1.43154	4	12.1992	1.2103	4	6.20201	1.00689e+07	242	27.0099	6.354
Q5F9Y5	Acetyl-coenzyme A carboxylase carboxyl transferase subunit beta OS=Neisseria gonorrhoeae (strain ATCC 700825 / FA 1090) GN=accD PE=3 SV=1 - [Q5F9Y5_NEIG1]	14.532	15.86	1	4	4	7	1.00729	7	29.9388	1.665	7	24.7351	1.26164	7	53.0047	9.07329e+07	290	31.7544	8.68994
Q5FA41	30S ribosomal protein S15 OS=Neisseria gonorrhoeae (strain ATCC 700825 / FA 1090) GN=rpsO PE=3 SV=1 - [RS15_NEIG1]	26.8395	46.07	1	4	4	7	0.906708	7	11.6756	1.3612	7	25.2613	1.37501	7	15.735	1.0143e+08	89	10.3797	11.1802
Q5FAA8	Peptide ABC transporter substrate-binding protein OS=Neisseria gonorrhoeae (strain ATCC 700825 / FA 1090) GN=NGO_0119 PE=4 SV=1 - [Q5FAA8_NEIG1]	11.4091	40.21	1	4	4	4	0.688648	4	29.4087	0.618817	4	19.2271	0.494144	4	31.3068	3.28099e+07	97	10.5756	9.93506
Q5FAB1	Protein-export protein SecB OS=Neisseria gonorrhoeae (strain ATCC 700825 / FA 1090) GN=secB PE=3 SV=1 - [SECB_NEIG1]	28.1125	36.73	1	4	4	13	0.840941	12	20.4878	1.82681	12	40.0944	1.71944	12	46.9069	5.09017e+08	147	16.3232	4.27197
Q5FAC5	Cytochrome C OS=Neisseria gonorrhoeae (strain ATCC 700825 / FA 1090) GN=NGO_0101 PE=4 SV=1 - [Q5FAC5_NEIG1]	13.9641	17.39	1	4	4	8	1.54503	8	18.5959	1.21317	8	8.34782	1.81696	8	11.4856	1.74885e+08	207	22.0031	9.15869
Q5FAD4	3-dehydroquinate synthase OS=Neisseria gonorrhoeae (strain ATCC 700825 / FA 1090) GN=aroB PE=3 SV=1 - [AROB_NEIG1]	7.15304	17.27	1	4	4	4	1.01791	3	0.25908	1.68764	3	7.58699	1.38624	3	16.1946	1.98467e+07	359	38.556	6.58057
Q5FAJ1	DNA polymerase III subunit beta OS=Neisseria gonorrhoeae (strain ATCC 700825 / FA 1090) GN=NGO_0002 PE=4 SV=1 - [Q5FAJ1_NEIG1]	9.1856	9.54	1	4	4	5	0.775371	5	16.0495	3.15794	5	35.3363	3.22653	5	41.587	1.75258e+07	367	40.8434	5.22412
A0A0H4IW93	Sulfatase OS=Neisseria gonorrhoeae (strain ATCC 700825 / FA 1090) GN=NGO_06735 PE=4 SV=1 - [A0A0H4IW93_NEIG1]	9.80531	9.75	1	3	3	3	1.06006	3	4.34188	1.37654	3	9.63244	1.10205	3	16.5393	2.08848e+07	472	53.2499	7.07861
Q5F4X3	Phosphate acyltransferase OS=Neisseria gonorrhoeae (strain ATCC 700825 / FA 1090) GN=plsX PE=3 SV=1 - [PLSX_NEIG1]	10.4203	9.48	1	3	3	5	0.772564	4	16.6274	1.82799	4	21.6769	1.9419	4	35.3025	2.28157e+07	348	36.7743	7.56201
Q5F506	30S ribosomal protein S21 OS=Neisseria gonorrhoeae (strain ATCC 700825 / FA 1090) GN=rpsU PE=3 SV=1 - [RS21_NEIG1]	17.5555	41.43	1	3	3	7	0.72477	7	7.94881	0.95451	7	7.88994	0.828081	7	4.67064	8.75313e+08	70	8.34968	11.019
Q5F598	Cytochrome C OS=Neisseria gonorrhoeae (strain ATCC 700825 / FA 1090) GN=NGO_2031 PE=4 SV=2 - [Q5F598_NEIG1]	6.49582	16.85	1	3	3	3	0.890421	3	87.44	1.38863	3	64.5151	0.927253	3	124.823	1.33782e+07	267	30.4793	8.92432
Q5F5H1	Uncharacterized protein OS=Neisseria gonorrhoeae (strain ATCC 700825 / FA 1090) GN=NGO_1955 PE=4 SV=1 - [Q5F5H1_NEIG1]	6.81738	1.66	1	3	3	3	0.923135	3	14.0177	0.921367	3	27.0768	0.94562	3	12.4635	18681965	1389	147.15	9.5249
Q5F5K1	Thioredoxin OS=Neisseria gonorrhoeae (strain ATCC 700825 / FA 1090) GN=NGO_1923 PE=4 SV=1 - [Q5F5K1_NEIG1]	4.81101	21.88	1	3	3	3	1.27131	3	14.5399	1.33592	3	21.5584	1.21679	3	22.2104	3.64965e+07	160	17.599	9.5835
Q5F5P7	Methionyl-tRNA formyltransferase OS=Neisseria gonorrhoeae (strain ATCC 700825 / FA 1090) GN=fmt PE=3 SV=1 - [FMT_NEIG1]	13.2439	13.64	1	3	3	5	0.796039	5	6.33471	2.1011	5	9.79585	1.72468	5	17.6223	2.74782e+07	308	32.8061	5.75732
Q5F5S9	50S ribosomal protein L23 OS=Neisseria gonorrhoeae (strain ATCC 700825 / FA 1090) GN=rplW PE=3 SV=1 - [RL23_NEIG1]	16.3285	44.34	1	3	3	8	0.827819	8	5.12238	1.12961	8	4.79959	0.859115	8	19.6695	1.98801e+08	106	11.4562	9.53955
Q5F5U5	50S ribosomal protein L30 OS=Neisseria gonorrhoeae (strain ATCC 700825 / FA 1090) GN=rpmD PE=3 SV=1 - [RL30_NEIG1]	13.3813	47.54	1	3	3	4	0.927287	4	36.6533	1.58287	4	12.5771	1.353	4	14.446	1.04203e+08	61	6.93179	9.99365
Q5F5V6	LysR family transcriptional regulator OS=Neisseria gonorrhoeae (strain ATCC 700825 / FA 1090) GN=NGO_1813 PE=4 SV=1 - [Q5F5V6_NEIG1]	11.5569	15.36	1	3	3	3	0.779684	3	33.1162	1.67572	3	33.7892	1.12737	3	26.1515	2.15685e+07	306	34.082	6.53662
Q5F5Y7	4-hydroxy-tetrahydrodipicolinate reductase OS=Neisseria gonorrhoeae (strain ATCC 700825 / FA 1090) GN=dapB PE=3 SV=1 - [DAPB_NEIG1]	15.8881	16.73	1	3	3	5	1.12295	5	21.8342	1.76205	5	3.9697	1.58744	5	29.1374	4.14728e+07	269	28.2516	6.37939
Q5F603	3-oxoacyl-[acyl-carrier-protein] synthase 2 OS=Neisseria gonorrhoeae (strain ATCC 700825 / FA 1090) GN=NGO_1763 PE=3 SV=1 - [Q5F603_NEIG1]	6.9881	6.75	1	3	3	3	0.8817	3	21.1189	1.8706	3	12.8994	1.7333	3	20.534	2.16584e+08	415	43.0148	5.59229
Q5F604	Acyl carrier protein OS=Neisseria gonorrhoeae (strain ATCC 700825 / FA 1090) GN=acpP PE=3 SV=1 - [ACP_NEIG1]	18.0205	39.74	1	3	3	6	1.0823	5	4.59939	2.33369	5	4.38182	2.45137	5	17.3404	5.77238e+07	78	8.5201	4.01807
Q5F685	50S ribosomal protein L27 OS=Neisseria gonorrhoeae (strain ATCC 700825 / FA 1090) GN=rpmA PE=3 SV=1 - [RL27_NEIG1]	3.76326	38.89	1	3	3	3	0.794859	3	3.06587	1.13731	3	12.8919	1.03034	3	17.7576	2.22577e+07	90	9.69307	10.0522
Q5F6I5	ABC transporter ATP-binding protein OS=Neisseria gonorrhoeae (strain ATCC 700825 / FA 1090) GN=NGO_1573 PE=4 SV=1 - [Q5F6I5_NEIG1]	2.934	6.45	1	3	3	3	0.842234	3	23.7148	1.92335	3	5.3138	1.33023	3	2.24788	1.46117e+07	558	61.9962	5.63037
Q5F6P2	Holo-[acyl-carrier-protein] synthase OS=Neisseria gonorrhoeae (strain ATCC 700825 / FA 1090) GN=acpS PE=3 SV=1 - [ACPS_NEIG1]	5.87951	35.2	1	3	3	3	0.78753	3	0.649178	1.25845	3	39.8359	1.12062	3	38.657	4.86523e+06	125	13.5001	8.11865
Q5F6V5	ABC transporter substrate-binding protein OS=Neisseria gonorrhoeae (strain ATCC 700825 / FA 1090) GN=NGO_1440 PE=3 SV=1 - [Q5F6V5_NEIG1]	16.0664	9.18	1	3	3	5	1.80361	5	25.336	1.32162	5	12.7631	1.1567	5	8.52385	4.84282e+07	392	41.7006	8.47021
Q5F6Y0	Na(+)-translocating NADH-quinone reductase subunit A OS=Neisseria gonorrhoeae (strain ATCC 700825 / FA 1090) GN=nqrA PE=3 SV=1 - [NQRA_NEIG1]	7.51472	7.83	1	3	3	3	0.776975	3	0.981913	1.50698	3	3.20577	0.918581	3	10.6124	1.21868e+07	447	48.7119	7.25439
Q5F707	GTP pyrophosphokinase OS=Neisseria gonorrhoeae (strain ATCC 700825 / FA 1090) GN=NGO_1382 PE=3 SV=1 - [Q5F707_NEIG1]	9.6166	5.29	1	3	3	4	0.758935	4	17.8933	1.54195	4	5.99671	1.50417	4	21.3533	1.46782e+07	737	82.3459	6.59521
Q5F763	GDSL family lipase OS=Neisseria gonorrhoeae (strain ATCC 700825 / FA 1090) GN=NGO_1323 PE=4 SV=1 - [Q5F763_NEIG1]	8.73201	12.21	1	3	3	3	1.26117	3	17.6812	1.73128	3	19.8361	1.59449	3	10.3561	5.22362e+07	213	22.9492	9.46631
Q5F7F1	Probable cytosol aminopeptidase OS=Neisseria gonorrhoeae (strain ATCC 700825 / FA 1090) GN=pepA PE=3 SV=1 - [Q5F7F1_NEIG1]	7.84898	6.41	1	3	3	3	0.754362	3	10.2819	1.96038	3	44.4375	1.32247	3	71.2099	2.44598e+07	468	49.9972	5.17334
Q5F7F5	Membrane protein OS=Neisseria gonorrhoeae (strain ATCC 700825 / FA 1090) GN=NGO_1223 PE=4 SV=1 - [Q5F7F5_NEIG1]	9.39431	12.56	1	3	3	3	1.81399	3	1.94911	1.88104	3	5.05658	3.09086	3	19.1739	3.9756e+07	223	24.0876	9.70068
Q5F7G3	Uncharacterized protein OS=Neisseria gonorrhoeae (strain ATCC 700825 / FA 1090) GN=NGO_1215 PE=4 SV=1 - [Q5F7G3_NEIG1]	10.8842	25.48	1	3	3	6	1.44318	6	57.6652	1.35861	6	32.2558	2.32627	6	65.2295	1.32935e+08	157	16.9627	9.33447
Q5F7G4	tRNA-specific 2-thiouridylase MnmA OS=Neisseria gonorrhoeae (strain ATCC 700825 / FA 1090) GN=mnmA PE=3 SV=2 - [MNMA_NEIG1]	6.97083	12.81	1	3	3	3	0.860653	3	11.094	1.54893	3	14.6008	1.31482	3	32.4003	9.99578e+06	367	40.8396	5.63037
Q5F7V7	Fimb protein OS=Neisseria gonorrhoeae (strain ATCC 700825 / FA 1090) GN=NGO_1060 PE=4 SV=1 - [Q5F7V7_NEIG1]	14.6332	14.94	1	3	3	4	0.959203	4	5.65288	1.78381	4	19.0298	1.28716	4	18.8024	1.82461e+07	261	29.1317	8.71924
Q5F856	Elongation factor P OS=Neisseria gonorrhoeae (strain ATCC 700825 / FA 1090) GN=efp PE=3 SV=1 - [EFP_NEIG1]	8.82419	15.05	1	3	3	3	1.00959	3	4.3067	2.38388	3	2.54033	2.12634	3	4.66921	2.45613e+07	186	20.8663	4.86865
Q5F8B4	Anthranilate synthase component 1 OS=Neisseria gonorrhoeae (strain ATCC 700825 / FA 1090) GN=trpE PE=3 SV=1 - [TRPE_NEIG1]	11.99	10.39	1	3	3	5	0.87699	4	3.5506	1.97958	4	35.5319	1.65054	4	24.1159	1.60927e+07	491	54.7139	5.57959
Q5F8G0	UDP-N-acetylmuramate--L-alanyl-gamma-D-glutamyl-meso-2,6-diaminoheptandioate ligase OS=Neisseria gonorrhoeae (strain ATCC 700825 / FA 1090) GN=mpl PE=3 SV=1 - [Q5F8G0_NEIG1]	2.59013	9.83	1	3	3	5	0.898228	5	48.6007	1.42593	5	13.7314	1.46611	5	18.7637	6.88212e+06	458	49.4151	6.7417
Q5F8J6	Transcriptional regulator HU subunit alpha OS=Neisseria gonorrhoeae (strain ATCC 700825 / FA 1090) GN=NGO_0777 PE=3 SV=1 - [Q5F8J6_NEIG1]	3.98598	44.94	1	3	3	3	0.999652	3	1.26413	1.23402	3	15.0596	1.40149	3	10.5555	2.11736e+07	89	9.37101	9.40771
Q5F8S0	Lipoprotein OS=Neisseria gonorrhoeae (strain ATCC 700825 / FA 1090) GN=NGO_0690 PE=4 SV=1 - [Q5F8S0_NEIG1]	19.652	22.13	1	3	3	7	1.59851	7	13.5514	1.71515	7	15.32	2.02758	7	30.0044	3.79116e+08	122	13.0224	8.07471
Q5F8V6	NH(3)-dependent NAD(+) synthetase OS=Neisseria gonorrhoeae (strain ATCC 700825 / FA 1090) GN=NGO_0654 PE=3 SV=2 - [Q5F8V6_NEIG1]	8.33218	12.17	1	3	3	3	0.803417	3	11.0474	1.46892	3	28.8389	1.14704	3	3.8844	3.35212e+07	263	29.2119	6.65381
Q5F8W0	RNA helicase OS=Neisseria gonorrhoeae (strain ATCC 700825 / FA 1090) GN=NGO_0650 PE=3 SV=1 - [Q5F8W0_NEIG1]	10.0005	8.44	1	3	3	3	0.768798	3	18.5843	1.15772	3	14.7214	0.862521	3	24.8419	1.92826e+07	462	51.1067	9.43701
Q5F8W2	Membrane protein OS=Neisseria gonorrhoeae (strain ATCC 700825 / FA 1090) GN=NGO_0648 PE=4 SV=1 - [Q5F8W2_NEIG1]	15.5776	22.83	1	3	3	10	0.803499	7	21.9494	1.18323	7	20.4536	1.02437	7	23.3904	5.00796e+07	184	20.2835	10.9019
Q5F8X6	Iron-sulfur cluster assembly scaffold protein IscU OS=Neisseria gonorrhoeae (strain ATCC 700825 / FA 1090) GN=NGO_0633 PE=3 SV=1 - [Q5F8X6_NEIG1]	8.90786	22.66	1	3	3	3	0.873001	3	16.6123	1.23592	3	32.7893	1.41446	3	40.9116	4.50091e+07	128	13.938	5.04639
Q5F906	Integration host factor subunit beta OS=Neisseria gonorrhoeae (strain ATCC 700825 / FA 1090) GN=ihfB PE=3 SV=2 - [Q5F906_NEIG1]	7.76157	27.88	1	3	3	3	0.690449	3	15.1312	1.51639	3	0.57293	1.35411	3	27.3613	2.51442e+07	104	11.7963	9.979
Q5F9F3	Cytochrome C550 OS=Neisseria gonorrhoeae (strain ATCC 700825 / FA 1090) GN=NGO_0443 PE=3 SV=1 - [Q5F9F3_NEIG1]	9.04737	8.23	1	3	3	5	1.30128	5	17.8018	1.29264	5	17.2839	1.29773	5	34.1236	1.90741e+07	389	42.6746	9.72998
Q5F9F9	3-methyl-2-oxobutanoate hydroxymethyltransferase OS=Neisseria gonorrhoeae (strain ATCC 700825 / FA 1090) GN=panB PE=3 SV=1 - [PANB_NEIG1]	8.19648	11.41	1	3	3	3	0.893799	3	35.4536	1.92596	3	47.0957	1.96374	3	21.2782	4.20194e+07	263	27.7059	6.52197
Q5F9I3	Peptidase PmbA OS=Neisseria gonorrhoeae (strain ATCC 700825 / FA 1090) GN=pmbA PE=4 SV=1 - [Q5F9I3_NEIG1]	4.66017	5.19	1	3	3	4	0.756161	4	31.5792	1.46367	4	31.7901	1.08389	4	68.3639	2.20993e+07	443	47.7666	5.5542
Q5F9K8	Delta-aminolevulinic acid dehydratase OS=Neisseria gonorrhoeae (strain ATCC 700825 / FA 1090) GN=NGO_0385 PE=3 SV=2 - [Q5F9K8_NEIG1]	8.67319	12.91	1	3	3	3	0.927136	2	48.4946	1.23304	3	49.5027	1.08966	3	120.455	3.548e+06	333	36.7545	5.49072
Q5F9U5	Queuine tRNA-ribosyltransferase OS=Neisseria gonorrhoeae (strain ATCC 700825 / FA 1090) GN=tgt PE=3 SV=1 - [TGT_NEIG1]	2.33437	9.7	1	3	3	3	0.883656	3	23.3284	1.3178	3	27.7336	1.1383	3	41.0494	3.05516e+07	371	41.9351	7.21045
Q5F9U6	Ferrochelatase OS=Neisseria gonorrhoeae (strain ATCC 700825 / FA 1090) GN=hemH PE=3 SV=1 - [HEMH_NEIG1]	4.59369	12.2	1	3	3	3	0.826402	3	12.1217	1.50307	3	43.2929	0.936794	3	7.94446	1.13995e+07	336	38.0364	6.53662
Q5F9X3	Amidophosphoribosyltransferase OS=Neisseria gonorrhoeae (strain ATCC 700825 / FA 1090) GN=purF PE=3 SV=1 - [Q5F9X3_NEIG1]	14.2807	9.92	1	3	3	3	0.735092	3	11.6719	2.50035	3	2.05739	2.12853	3	6.49585	3.04706e+07	514	55.9543	6.44287
Q5F9X6	GTPase Era OS=Neisseria gonorrhoeae (strain ATCC 700825 / FA 1090) GN=era PE=3 SV=2 - [Q5F9X6_NEIG1]	8.52241	9.12	1	3	3	3	0.936625	3	13.2197	2.09064	3	3.86299	1.78378	3	6.72895	2.66583e+07	307	34.5163	7.47412
Q5F9Z8	Cell division protein ZipA OS=Neisseria gonorrhoeae (strain ATCC 700825 / FA 1090) GN=NGO_0236 PE=3 SV=1 - [Q5F9Z8_NEIG1]	9.24637	8.64	1	3	3	4	1.07326	4	5.24472	1.5118	4	10.7669	1.0973	4	23.9839	1.40452e+07	428	46.973	6.39209
Q5FA40	Polyamine-transporting ATPase OS=Neisseria gonorrhoeae (strain ATCC 700825 / FA 1090) GN=NGO_0192 PE=3 SV=2 - [Q5FA40_NEIG1]	12.949	7.22	1	3	3	5	1.05201	5	29.6406	1.50699	5	15.6801	1.00296	5	5.89303	1.08973e+07	374	42.1335	5.60498
Q5FA43	Protein translocase subunit SecD OS=Neisseria gonorrhoeae (strain ATCC 700825 / FA 1090) GN=secD PE=3 SV=2 - [Q5FA43_NEIG1]	0	4.38	1	3	3	3	1.05238	3	6.37672	1.28111	3	13.4456	0.664654	3	1.35143	2.73607e+07	617	66.7041	6.18896
Q5FA44	Preprotein translocase subunit YajC OS=Neisseria gonorrhoeae (strain ATCC 700825 / FA 1090) GN=NGO_0188 PE=4 SV=1 - [Q5FA44_NEIG1]	8.30245	37.5	1	3	3	3	1.03825	3	16.4582	1.23556	3	9.62355	0.77777	3	26.9621	4.02793e+07	88	9.67428	9.81787
Q5FA55	Chemotaxis protein CheY OS=Neisseria gonorrhoeae (strain ATCC 700825 / FA 1090) GN=NGO_0177 PE=4 SV=1 - [Q5FA55_NEIG1]	8.14111	16.89	1	3	3	5	0.792643	3	5.78098	2.93731	4	44.8023	2.72475	4	57.3244	7.42685e+07	225	24.764	5.68115
Q5FA57	30S ribosomal protein S16 OS=Neisseria gonorrhoeae (strain ATCC 700825 / FA 1090) GN=rpsP PE=3 SV=1 - [RS16_NEIG1]	13.2747	33.33	1	3	3	4	0.97781	4	32.1945	1.0303	4	29.3626	1.03948	4	45.3415	7.16874e+07	81	9.31402	10.8872
Q5FA80	RNA helicase OS=Neisseria gonorrhoeae (strain ATCC 700825 / FA 1090) GN=NGO_0149 PE=3 SV=1 - [Q5FA80_NEIG1]	2.85134	10.94	1	3	3	5	1.0256	2	12.3509	1.19967	4	38.5011	1.13993	3	3.22318	3.86304e+07	457	50.8415	9.17334
Q5FA91	Protease Do OS=Neisseria gonorrhoeae (strain ATCC 700825 / FA 1090) GN=NGO_0138 PE=4 SV=1 - [Q5FA91_NEIG1]	10.4069	9.02	1	3	3	4	1.14962	4	9.33431	1.34487	4	14.129	1.47831	4	26.6811	5.78802e+06	499	52.5351	5.46533
Q5FAH3	S-adenosylmethionine:tRNA ribosyltransferase-isomerase OS=Neisseria gonorrhoeae (strain ATCC 700825 / FA 1090) GN=queA PE=3 SV=1 - [QUEA_NEIG1]	6.86019	8.67	1	3	3	3	0.902342	3	11.1601	2.59831	3	28.5176	2.34896	3	31.2411	6.56512e+06	346	38.1274	6.41748
Q5FAJ7	Triosephosphate isomerase OS=Neisseria gonorrhoeae (strain ATCC 700825 / FA 1090) GN=tpiA PE=3 SV=1 - [Q5FAJ7_NEIG1]	7.53732	8.56	1	3	3	3	0.800331	3	11.6888	2.05122	3	37.3693	1.78776	3	0.800235	6.69309e+07	257	28.2755	5.8208
A0A0H4IRX3	23S rRNA (guanosine-2'-O-)-methyltransferase RlmB OS=Neisseria gonorrhoeae (strain ATCC 700825 / FA 1090) GN=rlmB PE=3 SV=1 - [A0A0H4IRX3_NEIG1]	7.18033	7.6	1	2	2	2	0.874956	2	30.6164	1.56955	2	22.7364	1.52539	2	40.5459	2.26261e+07	250	27.3929	6.94678
A0A0H4IT57	Membrane protein OS=Neisseria gonorrhoeae (strain ATCC 700825 / FA 1090) GN=NGO_08475 PE=4 SV=1 - [A0A0H4IT57_NEIG1]	6.42813	7.96	1	2	2	2	1.03719	2	4.47255	1.46238	2	6.07996	1.44598	2	22.2678	1.52624e+07	377	43.0584	5.66846
Q5F4W6	Membrane protein insertase YidC OS=Neisseria gonorrhoeae (strain ATCC 700825 / FA 1090) GN=yidC PE=3 SV=1 - [YIDC_NEIG1]	5.40484	3.85	1	2	2	2	1.05828	2	1.63462	1.44419	2	8.62301	1.15401	2	0.450482	3.60087e+07	545	60.5022	8.646
Q5F513	50S ribosomal protein L31 OS=Neisseria gonorrhoeae (strain ATCC 700825 / FA 1090) GN=rpmE PE=3 SV=1 - [RL31_NEIG1]	4.54458	18.31	1	2	2	4	0.817988	4	11.0052	3.09886	4	12.7855	3.27606	4	14.0625	5.60738e+07	71	8.15999	9.0415
Q5F529	tRNA modification GTPase MnmE OS=Neisseria gonorrhoeae (strain ATCC 700825 / FA 1090) GN=mnmE PE=3 SV=1 - [MNME_NEIG1]	5.39354	5.13	1	2	2	2	0.807127	2	21.0502	1.11045	2	34.985	0.797176	2	9.82121	2.23698e+07	448	47.4108	5.04639
Q5F537	Prokaryotic lipo-attachment site family protein OS=Neisseria gonorrhoeae (strain ATCC 700825 / FA 1090) GN=NGO_2099 PE=4 SV=1 - [Q5F537_NEIG1]	5.64727	51.79	1	2	2	2	1.89322	2	9.09792	1.59646	2	29.4723	1.53034	2	34.7914	1.04742e+08	56	5.8861	9.5542
Q5F539	Uncharacterized protein OS=Neisseria gonorrhoeae (strain ATCC 700825 / FA 1090) GN=NGO_2097 PE=4 SV=1 - [Q5F539_NEIG1]	9.55085	25	1	2	2	4	1.20471	4	18.3186	1.50176	4	16.6396	1.774	4	8.34898	3.5338e+08	140	15.15	9.99365
Q5F544	Iron ABC transporter substrate-binding protein OS=Neisseria gonorrhoeae (strain ATCC 700825 / FA 1090) GN=NGO_2092 PE=4 SV=1 - [Q5F544_NEIG1]	2.49624	6.81	1	2	2	2	0.870831	2	8.76988	1.7183	2	2.26558	0.823343	2	3.93578	1.63042e+06	323	34.3859	5.84619
Q5F556	Probable nicotinate-nucleotide adenylyltransferase OS=Neisseria gonorrhoeae (strain ATCC 700825 / FA 1090) GN=nadD PE=3 SV=1 - [NADD_NEIG1]	4.39817	7.96	1	2	2	2	0.781441	2	6.29933	1.21138	2	10.9136	0.998138	2	14.8377	2.26854e+07	201	22.2234	8.22119
Q5F595	DNA ligase OS=Neisseria gonorrhoeae (strain ATCC 700825 / FA 1090) GN=NGO_2034 PE=4 SV=1 - [Q5F595_NEIG1]	3.4003	5.84	1	2	2	2	0.955491	2	9.47766	1.50908	2	42.5822	1.61267	2	5.24666	7300239	274	30.7741	10.0522
Q5F5A6	Cell division protein ZapA OS=Neisseria gonorrhoeae (strain ATCC 700825 / FA 1090) GN=NGO_2023 PE=4 SV=1 - [Q5F5A6_NEIG1]	5.78982	20.79	1	2	2	2	0.851925	2	29.1951	1.52628	2	8.53092	1.42164	2	23.1046	28074250	101	10.9436	5.19873
Q5F5A8	Glycerol-3-phosphate dehydrogenase [NAD(P)+] OS=Neisseria gonorrhoeae (strain ATCC 700825 / FA 1090) GN=gpsA PE=3 SV=1 - [GPDA_NEIG1]	1.9296	5.17	1	2	2	2	0.9006	2	7.95563	1.51695	2	5.08565	1.38706	2	7.05609	5.98427e+06	329	35.3455	6.41748
Q5F5D7	Restriction endonuclease HaeII OS=Neisseria gonorrhoeae (strain ATCC 700825 / FA 1090) GN=NGO_1992 PE=4 SV=1 - [Q5F5D7_NEIG1]	0	9.14	1	2	2	2	0.967291	2	37.1834	1.39373	2	9.65468	0.846059	2	29.4181	7.66316e+06	350	40.527	5.52881
Q5F5H5	Peptide chain release factor 2 OS=Neisseria gonorrhoeae (strain ATCC 700825 / FA 1090) GN=prfB PE=3 SV=1 - [RF2_NEIG1]	2.03291	5.72	1	2	2	2	0.872675	2	3.57729	2.01143	2	14.5955	1.978	2	22.4531	2.71815e+07	367	41.3365	4.77979
Q5F5I6	Phosphoribosylamine--glycine ligase OS=Neisseria gonorrhoeae (strain ATCC 700825 / FA 1090) GN=purD PE=3 SV=1 - [Q5F5I6_NEIG1]	3.24777	12.29	1	2	2	2	0.648463	2	36.4257	1.80646	2	95.0317	1.43135	2	146.772	935839	423	45.1489	5.14795
Q5F5N0	Sodium:glutamate symporter OS=Neisseria gonorrhoeae (strain ATCC 700825 / FA 1090) GN=NGO_1890 PE=4 SV=1 - [Q5F5N0_NEIG1]	5.61327	5.45	1	2	2	2	0.702278	2	19.9512	1.35047	2	9.18554	0.843597	2	31.7082	1.72493e+07	404	42.9948	7.02002
Q5F5N1	Uncharacterized protein OS=Neisseria gonorrhoeae (strain ATCC 700825 / FA 1090) GN=NGO_1889 PE=4 SV=1 - [Q5F5N1_NEIG1]	5.11454	4.73	1	2	2	2	0.916906	2	9.01395	1.39564	2	4.77778	1.35332	2	6.29772	18226201	338	36.8136	4.83057
Q5F5P1	Aspartate carbamoyltransferase regulatory chain OS=Neisseria gonorrhoeae (strain ATCC 700825 / FA 1090) GN=pyrI PE=3 SV=1 - [PYRI_NEIG1]	2.50296	18.42	1	2	2	3	1.49323	3	35.1552	2.3336	3	24.356	1.59567	3	27.8091	9.76785e+06	152	16.9048	8.92432
Q5F5R0	Transcription termination/antitermination protein NusG OS=Neisseria gonorrhoeae (strain ATCC 700825 / FA 1090) GN=nusG PE=3 SV=1 - [Q5F5R0_NEIG1]	5.38795	16.29	1	2	2	4	0.945527	4	2.64579	1.72404	4	22.0239	1.72252	4	33.7534	1.76051e+07	178	20.5376	6.25244
Q5F5T5	50S ribosomal protein L29 OS=Neisseria gonorrhoeae (strain ATCC 700825 / FA 1090) GN=rpmC PE=3 SV=1 - [RL29_NEIG1]	2.12355	31.75	1	2	2	2	1.0653	2	33.0581	1.47861	2	1.13764	1.61902	2	26.8957	1.33094e+07	63	7.07394	10.0815
Q5F5V9	Uncharacterized protein OS=Neisseria gonorrhoeae (strain ATCC 700825 / FA 1090) GN=NGO_1810 PE=4 SV=1 - [Q5F5V9_NEIG1]	6.35183	12.34	1	2	2	2	1.21187	2	17.3225	1.29742	2	14.7424	1.67116	2	7.54511	1.47261e+07	154	17.0406	5.92236
Q5F621	NADH-quinone oxidoreductase OS=Neisseria gonorrhoeae (strain ATCC 700825 / FA 1090) GN=NGO_1745 PE=3 SV=1 - [Q5F621_NEIG1]	5.16198	3.32	1	2	2	3	1.29915	3	35.1493	1.43867	3	22.4999	1.16845	3	2.87859	1.23349e+07	753	81.3406	6.12549
Q5F665	Membrane protein OS=Neisseria gonorrhoeae (strain ATCC 700825 / FA 1090) GN=NGO_1701 PE=4 SV=1 - [Q5F665_NEIG1]	18.0477	26.49	1	2	2	5	1.09656	5	17.8321	1.68261	5	42.5193	1.30136	5	16.9582	1.79168e+07	151	15.9694	7.23975
Q5F686	50S ribosomal protein L21 OS=Neisseria gonorrhoeae (strain ATCC 700825 / FA 1090) GN=rplU PE=3 SV=1 - [RL21_NEIG1]	9.45279	15.69	1	2	2	3	0.969109	3	4.16876	1.42189	3	11.1951	1.16925	3	1.61585	9.29414e+08	102	11.4403	10.0522
Q5F687	Octaprenyl diphosphate synthase OS=Neisseria gonorrhoeae (strain ATCC 700825 / FA 1090) GN=NGO_1675 PE=3 SV=1 - [Q5F687_NEIG1]	5.0712	9.57	1	2	2	2	0.873159	2	9.42457	1.98879	2	22.4234	1.81613	2	26.2778	9.17754e+06	324	35.392	4.83057
Q5F697	Branched-chain amino acid aminotransferase OS=Neisseria gonorrhoeae (strain ATCC 700825 / FA 1090) GN=NGO_1665 PE=3 SV=1 - [Q5F697_NEIG1]	5.42815	11.75	1	2	2	2	0.710934	2	3.59365	2.81631	2	51.3634	1.96978	2	63.4122	6.23572e+06	332	36.1066	5.99854
Q5F6H2	Uncharacterized protein OS=Neisseria gonorrhoeae (strain ATCC 700825 / FA 1090) GN=NGO_1586 PE=4 SV=1 - [Q5F6H2_NEIG1]	5.60456	25.81	1	2	2	2	0.845753	2	17.8507	1.14122	2	26.2267	1.17185	2	10.4042	9.28652e+06	93	11.0412	4.94482
Q5F6L1	Cytochrome C biogenesis protein CcmE OS=Neisseria gonorrhoeae (strain ATCC 700825 / FA 1090) GN=NGO_1540 PE=4 SV=1 - [Q5F6L1_NEIG1]	2.40068	2.74	1	2	2	2	1.0203	2	4.65293	1.27489	2	24.406	1.22522	2	17.9004	5.43755e+06	548	61.1234	9.11475
Q5F6L8	UDP-N-acetylglucosamine--N-acetylmuramyl-(pentapeptide) pyrophosphoryl-undecaprenol N-acetylglucosamine transferase OS=Neisseria gonorrhoeae (strain ATCC 700825 / FA 1090) GN=murG PE=3 SV=1 - [MURG_NEIG1]	4.87144	6.2	1	2	2	2	1.10938	2	13.2177	1.32278	2	25.3727	1.21975	2	45.1627	1.76988e+07	355	38.2584	9.14404
Q5F6M2	Cell division protein FtsA OS=Neisseria gonorrhoeae (strain ATCC 700825 / FA 1090) GN=ftsA PE=3 SV=1 - [Q5F6M2_NEIG1]	6.30751	4.11	1	2	2	2	1.02765	2	2.93022	1.96428	2	13.3487	1.36901	2	21.604	3.10713e+07	414	44.0271	5.51611
Q5F6P9	Glutamate racemase OS=Neisseria gonorrhoeae (strain ATCC 700825 / FA 1090) GN=murI PE=3 SV=1 - [MURI_NEIG1]	4.73738	14.07	1	2	2	2	0.749312	2	6.59952	1.47716	2	30.6202	1.28357	2	57.019	4.22479e+06	270	29.4965	7.03467
Q5F6R2	Arginine decarboxylase OS=Neisseria gonorrhoeae (strain ATCC 700825 / FA 1090) GN=NGO_1487 PE=3 SV=1 - [Q5F6R2_NEIG1]	9.76569	3.17	1	2	2	3	0.994252	3	6.60312	1.72325	3	28.2822	1.42404	3	29.8937	1.96627e+07	630	71.0077	5.80811
Q5F6U3	Aminotransferase OS=Neisseria gonorrhoeae (strain ATCC 700825 / FA 1090) GN=NGO_1452 PE=3 SV=1 - [Q5F6U3_NEIG1]	9.40456	7.07	1	2	2	3	0.816972	3	33.4429	1.51608	3	20.5335	1.45343	3	13.1734	1.4873e+07	396	44.0375	6.01123
Q5F6V2	Chromosome partition protein Smc OS=Neisseria gonorrhoeae (strain ATCC 700825 / FA 1090) GN=smc PE=3 SV=1 - [Q5F6V2_NEIG1]	3.32112	2.33	1	2	2	2	0.732405	2	0.268052	1.00767	2	58.2325	0.833482	2	48.6485	1.66661e+06	1161	130.281	5.65576
Q5F6X5	Na(+)-translocating NADH-quinone reductase subunit F OS=Neisseria gonorrhoeae (strain ATCC 700825 / FA 1090) GN=nqrF PE=3 SV=1 - [NQRF_NEIG1]	4.28136	7.65	1	2	2	2	1.04403	2	18.3093	1.38632	2	16.8328	1.08083	2	3.36287	1.20012e+07	405	45.1436	5.22412
Q5F710	Protein TonB OS=Neisseria gonorrhoeae (strain ATCC 700825 / FA 1090) GN=NGO_1379 PE=3 SV=1 - [Q5F710_NEIG1]	9.61908	10.6	1	2	2	2	0.90037	2	14.9373	1.86522	2	44.0182	1.43068	2	33.0924	1.27906e+07	283	28.7318	7.15186
Q5F711	Biopolymer transporter ExbB OS=Neisseria gonorrhoeae (strain ATCC 700825 / FA 1090) GN=NGO_1378 PE=3 SV=2 - [Q5F711_NEIG1]	6.2418	11.82	1	2	2	2	0.719875	2	10.0271	1.28555	2	2.10317	0.906366	2	19.3266	2.2228e+07	220	24.1168	9.43701
Q5F714	Peptidase OS=Neisseria gonorrhoeae (strain ATCC 700825 / FA 1090) GN=NGO_1375 PE=4 SV=1 - [Q5F714_NEIG1]	4.70174	2.41	1	2	2	2	1.07107	2	5.55066	2.00057	2	8.00985	1.84233	2	3.80839	9.05757e+06	582	66.1124	6.06201
Q5F725	Acriflavine resistance protein B OS=Neisseria gonorrhoeae (strain ATCC 700825 / FA 1090) GN=NGO_1364 PE=3 SV=1 - [Q5F725_NEIG1]	2.12045	1.22	1	2	2	2	1.27477	2	14.3622	1.47998	2	36.3181	1.15285	2	45.3118	8.89767e+06	1067	113.924	7.62061
Q5F754	DNA topoisomerase 4 subunit B OS=Neisseria gonorrhoeae (strain ATCC 700825 / FA 1090) GN=parE PE=3 SV=1 - [Q5F754_NEIG1]	8.06315	6.2	1	2	2	4	0.731837	4	1.93534	1.89206	4	11.6123	1.50669	4	5.21249	1.12619e+07	661	72.0542	5.97314
Q5F761	Glycine dehydrogenase (decarboxylating) OS=Neisseria gonorrhoeae (strain ATCC 700825 / FA 1090) GN=gcvP PE=3 SV=1 - [GCSP_NEIG1]	11.8715	2.53	1	2	2	3	0.810763	3	9.31951	2.02366	3	16.3522	1.83004	3	13.9196	1.51631e+07	950	104.014	5.88428
Q5F7A5	Nitric oxide reductase large subunit OS=Neisseria gonorrhoeae (strain ATCC 700825 / FA 1090) GN=NGO_1275 PE=4 SV=2 - [Q5F7A5_NEIG1]	3.25512	4.13	1	2	2	2	0.882031	2	3.88349	1.1706	2	34.0438	0.851625	2	37.5155	1.10721e+07	751	84.3052	6.7124
Q5F7D5	3-hydroxyacid dehydrogenase OS=Neisseria gonorrhoeae (strain ATCC 700825 / FA 1090) GN=NGO_1243 PE=4 SV=1 - [Q5F7D5_NEIG1]	10.8264	8.65	1	2	2	3	0.81304	3	35.306	1.74696	3	10.4542	1.23759	3	10.3552	9.65283e+08	289	30.2306	5.68115
Q5F7E0	ATP phosphoribosyltransferase OS=Neisseria gonorrhoeae (strain ATCC 700825 / FA 1090) GN=hisG PE=3 SV=1 - [HIS1_NEIG1]	3.12057	12.67	1	2	2	2	0.958269	2	14.3274	1.83503	2	25.6882	1.77837	2	27.4096	6.03162e+06	221	23.7608	7.97217
Q5F7F7	GntR family transcriptional regulator OS=Neisseria gonorrhoeae (strain ATCC 700825 / FA 1090) GN=NGO_1221 PE=4 SV=1 - [Q5F7F7_NEIG1]	4.92957	8.4	1	2	2	3	0.959578	3	42.395	1.71698	3	1.80339	1.31685	3	56.785	1.05842e+07	238	27.0691	6.7417
Q5F7G5	Long-chain fatty acid--CoA ligase OS=Neisseria gonorrhoeae (strain ATCC 700825 / FA 1090) GN=NGO_1213 PE=4 SV=1 - [Q5F7G5_NEIG1]	3.20195	6.29	1	2	2	2	1.05807	2	0.437933	2.16729	2	22.2623	2.19347	2	34.6753	7.135e+06	556	61.3904	8.57275
Q5F7H2	Phosphatidylserine decarboxylase proenzyme OS=Neisseria gonorrhoeae (strain ATCC 700825 / FA 1090) GN=psd PE=3 SV=1 - [PSD_NEIG1]	4.53372	7.34	1	2	2	2	0.956031	2	13.3718	1.34119	2	11.2185	1.0226	2	13.3626	1.24003e+07	259	28.2767	8.14795
Q5F7J4	Phosphoribosylformylglycinamidine synthase OS=Neisseria gonorrhoeae (strain ATCC 700825 / FA 1090) GN=purL PE=3 SV=2 - [PUR4_NEIG1]	4.9788	1.52	1	2	2	2	0.844656	2	22.0912	2.08444	2	10.6344	1.88323	2	18.1506	7411048	1314	142.882	5.24951
Q5F7J8	Pilin OS=Neisseria gonorrhoeae (strain ATCC 700825 / FA 1090) GN=NGO_1177 PE=4 SV=1 - [Q5F7J8_NEIG1]	5.5366	17.45	1	2	2	2	1.44167	2	7.86681	1.38152	2	5.26127	1.09116	2	8.1183	1.36994e+07	149	16.8239	9.29053
Q5F7N6	GTP cyclohydrolase-2 OS=Neisseria gonorrhoeae (strain ATCC 700825 / FA 1090) GN=ribA PE=3 SV=1 - [RIBA_NEIG1]	6.08443	10.15	1	2	2	2	0.939441	2	10.915	1.68905	2	3.60968	1.29773	2	20.1306	4.00459e+07	197	21.8401	5.77002
Q5F7U1	Malonic semialdehyde reductase OS=Neisseria gonorrhoeae (strain ATCC 700825 / FA 1090) GN=NGO_1079 PE=3 SV=1 - [Q5F7U1_NEIG1]	2.93618	5.49	1	2	2	2	0.854714	2	3.95303	1.54868	2	16.6095	1.34946	2	15.9474	1.50141e+07	273	30.1051	5.08447
Q5F7Y2	Fumarate hydratase class II OS=Neisseria gonorrhoeae (strain ATCC 700825 / FA 1090) GN=fumC PE=3 SV=1 - [Q5F7Y2_NEIG1]	11.8058	5.63	1	2	2	5	1.00277	4	9.41697	2.76607	4	12.8292	2.47216	4	16.8672	1.69301e+07	462	49.2511	6.29053
Q5F832	Thermonuclease OS=Neisseria gonorrhoeae (strain ATCC 700825 / FA 1090) GN=NGO_0969 PE=4 SV=2 - [Q5F832_NEIG1]	8.27696	11.66	1	2	2	2	0.636261	2	17.3509	1.05163	2	20.0088	0.688591	2	18.4873	2.67883e+07	223	24.7035	9.33447
Q5F836	Nicotinate phosphoribosyltransferase OS=Neisseria gonorrhoeae (strain ATCC 700825 / FA 1090) GN=pncB PE=3 SV=2 - [PNCB_NEIG1]	8.12409	8.96	1	2	2	2	0.844902	2	4.16713	1.4392	2	61.9669	1.42954	2	73.252	1.32e+07	402	46.236	7.34229
Q5F839	Universal stress protein OS=Neisseria gonorrhoeae (strain ATCC 700825 / FA 1090) GN=NGO_0959 PE=3 SV=1 - [Q5F839_NEIG1]	7.72928	22.08	1	2	2	2	0.745218	2	8.6445	1.07221	2	36.9198	0.716512	2	38.0789	2.54433e+07	154	16.4114	5.89697
Q5F871	Succinate dehydrogenase iron-sulfur subunit OS=Neisseria gonorrhoeae (strain ATCC 700825 / FA 1090) GN=sdhB PE=3 SV=2 - [Q5F871_NEIG1]	4.5542	8.51	1	2	2	2	0.891268	2	21.9776	1.51318	2	26.2909	0.986605	2	28.785	1.82213e+07	235	27.1267	7.48877
Q5F890	Transcription elongation factor GreA OS=Neisseria gonorrhoeae (strain ATCC 700825 / FA 1090) GN=greA PE=3 SV=1 - [Q5F890_NEIG1]	5.8404	16.46	1	1	2	2	0.868493	1		1.80889	1		1.52495	1		3.83329e+07	158	17.4621	4.79248
Q5F898	D-lactate dehydrogenase OS=Neisseria gonorrhoeae (strain ATCC 700825 / FA 1090) GN=NGO_0890 PE=4 SV=1 - [Q5F898_NEIG1]	5.72442	5.15	1	2	2	2	0.809724	2	4.12921	1.57245	2	23.6781	1.09681	2	0.170499	4.91474e+06	563	63.35	6.87354
Q5F8B6	ABC transporter ATP-binding protein OS=Neisseria gonorrhoeae (strain ATCC 700825 / FA 1090) GN=NGO_0870 PE=4 SV=1 - [Q5F8B6_NEIG1]	5.05113	3.62	1	2	2	2	0.926013	2	5.13054	2.1422	2	74.3657	1.47651	2	27.0344	4.64257e+06	636	71.6877	5.73193
Q5F8D8	Acetylglutamate kinase OS=Neisseria gonorrhoeae (strain ATCC 700825 / FA 1090) GN=argB PE=3 SV=1 - [ARGB_NEIG1]	3.98103	10.07	1	2	2	2	0.704815	2	5.83793	2.08708	2	81.5528	1.74752	2	74.8949	6.57449e+06	298	31.3966	5.88428
Q5F8I0	Lipoyl synthase OS=Neisseria gonorrhoeae (strain ATCC 700825 / FA 1090) GN=lipA PE=3 SV=1 - [LIPA_NEIG1]	2.00925	6.42	1	2	2	2	0.855111	2	30.8235	1.28822	2	36.3315	0.999608	2	13.8569	3.35344e+07	327	37.0228	7.53271
Q5F8I5	Stomatin 2 OS=Neisseria gonorrhoeae (strain ATCC 700825 / FA 1090) GN=NGO_0788 PE=4 SV=1 - [Q5F8I5_NEIG1]	9.565	8.25	1	2	2	3	1.32078	3	25.1999	1.28861	3	14.3277	0.881404	3	52.5373	2.46304e+07	315	34.4562	5.79541
Q5F8L5	Periplasmic protein OS=Neisseria gonorrhoeae (strain ATCC 700825 / FA 1090) GN=NGO_0757 PE=4 SV=1 - [Q5F8L5_NEIG1]	8.18243	20.83	1	2	2	4	1.20966	4	26.3102	1.44001	4	20.6237	1.86119	4	24.1475	2.30453e+07	144	16.6043	9.1001
Q5F8N5	Ferredoxin-NADP reductase OS=Neisseria gonorrhoeae (strain ATCC 700825 / FA 1090) GN=NGO_0734 PE=4 SV=1 - [Q5F8N5_NEIG1]	3.05673	7.72	1	2	2	2	0.823644	2	2.11304	1.39546	2	37.3046	1.21906	2	40.063	5.18153e+06	259	29.1969	6.88818
Q5F8Q9	3,4-dihydroxy-2-butanone 4-phosphate synthase OS=Neisseria gonorrhoeae (strain ATCC 700825 / FA 1090) GN=NGO_0704 PE=3 SV=2 - [Q5F8Q9_NEIG1]	7.34494	5.17	1	2	2	2	1.12876	2	9.11216	2.5248	2	45.1723	2.21056	2	52.1392	2.50393e+07	445	48.3939	6.66846
Q5F8W4	Acetylornithine aminotransferase OS=Neisseria gonorrhoeae (strain ATCC 700825 / FA 1090) GN=argD PE=3 SV=1 - [Q5F8W4_NEIG1]	3.09277	8.31	1	2	2	2	0.784214	2	18.3571	1.24382	2	17.6979	1.13451	2	7.44139	4.51341e+06	397	42.6568	7.35693
Q5F8Z5	Ribonucleotide-diphosphate reductase subunit beta OS=Neisseria gonorrhoeae (strain ATCC 700825 / FA 1090) GN=NGO_0615 PE=4 SV=1 - [Q5F8Z5_NEIG1]	9.28334	5.73	1	2	2	3	0.802477	3	2.83757	1.4787	3	102.141	1.52522	3	110.46	2.15852e+07	384	44.026	4.75439
Q5F910	Nucleoside diphosphate kinase OS=Neisseria gonorrhoeae (strain ATCC 700825 / FA 1090) GN=NGO_0597 PE=3 SV=1 - [Q5F910_NEIG1]	5.55091	26.21	1	2	2	2	0.842477	2	0.642068	1.90001	2	1.82623	1.86853	2	11.7993	1.73519e+07	103	11.2776	4.80518
Q5F914	ATP-dependent Clp protease proteolytic subunit OS=Neisseria gonorrhoeae (strain ATCC 700825 / FA 1090) GN=clpP PE=3 SV=1 - [CLPP_NEIG1]	7.67552	10.29	1	2	2	4	0.935874	4	3.79316	4.08858	4	6.03386	4.01631	4	6.30482	8.03317e+07	204	22.5916	5.46533
Q5F947	Aspartate ammonia-lyase OS=Neisseria gonorrhoeae (strain ATCC 700825 / FA 1090) GN=aspA PE=3 SV=1 - [Q5F947_NEIG1]	9.06707	4.95	1	2	2	3	0.753472	3	31.0031	1.39052	3	28.6929	1.22716	3	8.51309	7.87394e+06	465	50.6603	5.5415
Q5F955	tRNA-modifying protein OS=Neisseria gonorrhoeae (strain ATCC 700825 / FA 1090) GN=NGO_0548 PE=3 SV=2 - [Q5F955_NEIG1]	10.7056	11.85	1	2	2	3	0.937511	3	1.45114	0.988675	3	14.0147	0.950901	3	22.0917	2.51944e+07	287	31.002	6.34131
Q5F9E0	Deoxyuridine 5'-triphosphate nucleotidohydrolase OS=Neisseria gonorrhoeae (strain ATCC 700825 / FA 1090) GN=dut PE=3 SV=1 - [DUT_NEIG1]	7.12642	14.67	1	2	2	2	0.815276	2	7.74674	1.99397	2	30.7768	1.76684	2	35.9507	3.97797e+07	150	16.0933	4.97021
Q5F9E6	Ferrous iron transporter B OS=Neisseria gonorrhoeae (strain ATCC 700825 / FA 1090) GN=NGO_0452 PE=4 SV=1 - [Q5F9E6_NEIG1]	10.7629	11.31	1	2	2	4	1.58262	3	3.96883	1.73231	3	9.10963	2.33686	3	8.77063	1.90893e+07	221	24.6714	8.55811
Q5F9I7	Restriction endonuclease OS=Neisseria gonorrhoeae (strain ATCC 700825 / FA 1090) GN=NGO_0407 PE=4 SV=1 - [Q5F9I7_NEIG1]	1.96542	2.03	1	2	2	2	0.990846	2	7.6593	1.62363	2	10.0194	1.16304	2	35.2029	7.45307e+06	1032	118.426	6.23975
Q5F9K2	Uncharacterized protein OS=Neisseria gonorrhoeae (strain ATCC 700825 / FA 1090) GN=NGO_0391 PE=4 SV=1 - [Q5F9K2_NEIG1]	9.69361	12.23	1	2	2	2	1.03159	2	21.8983	1.40407	2	16.2615	1.20624	2	8.75011	1.5634e+07	188	20.1227	5.16064
Q5F9L1	ATP-dependent zinc metalloprotease FtsH OS=Neisseria gonorrhoeae (strain ATCC 700825 / FA 1090) GN=ftsH PE=3 SV=1 - [Q5F9L1_NEIG1]	7.83308	5.95	1	2	2	2	1.05053	2	2.04323	1.59598	2	39.5663	1.08571	2	73.3099	9.89232e+06	655	72.0705	5.40186
Q5F9L9	Amino acid ABC transporter ATPase OS=Neisseria gonorrhoeae (strain ATCC 700825 / FA 1090) GN=NGO_0374 PE=4 SV=1 - [Q5F9L9_NEIG1]	7.2112	11.95	1	2	2	2	0.727941	2	34.6311	0.993934	2	40.5744	0.824964	2	52.2952	1.79198e+07	251	27.9788	7.13721
Q5F9M0	Cysteine ABC transporter permease OS=Neisseria gonorrhoeae (strain ATCC 700825 / FA 1090) GN=NGO_0373 PE=3 SV=1 - [Q5F9M0_NEIG1]	2.45757	9.66	1	2	2	3	0.884298	3	31.1437	1.37055	3	8.90558	1.10593	3	11.0237	2.84198e+07	238	26.3712	9.5249
Q5F9M3	RecBCD enzyme subunit RecB OS=Neisseria gonorrhoeae (strain ATCC 700825 / FA 1090) GN=recB PE=3 SV=1 - [Q5F9M3_NEIG1]	0	3.83	1	2	2	3	1.19574	2	10.7841	1.02136	2	5.95165	1.03333	2	6.56098	1.89904e+07	1200	134.185	5.84619
Q5F9N5	Chitinase OS=Neisseria gonorrhoeae (strain ATCC 700825 / FA 1090) GN=NGO_0358 PE=4 SV=2 - [Q5F9N5_NEIG1]	4.29849	14.29	1	2	2	2	1.71295	2	48.8779	1.39207	2	5.08948	2.43987	2	49.684	2.35828e+07	140	15.7008	9.43701
Q5F9P5	Pilus assembly protein OS=Neisseria gonorrhoeae (strain ATCC 700825 / FA 1090) GN=NGO_0348 PE=4 SV=1 - [Q5F9P5_NEIG1]	4.69938	18.97	1	2	2	2	0.963856	2	6.8665	2.25654	2	18.9518	2.04594	2	17.5224	6.56914e+07	116	12.7885	5.87158
Q5F9Q4	Diaminopimelate epimerase OS=Neisseria gonorrhoeae (strain ATCC 700825 / FA 1090) GN=dapF PE=3 SV=1 - [Q5F9Q4_NEIG1]	3.70479	7.42	1	2	2	2	0.837226	2	6.5636	3.14842	2	0.887026	2.64265	2	10.4371	2.79457e+07	283	30.4049	4.91943
Q5F9R9	Ubiquinone/menaquinone biosynthesis C-methyltransferase UbiE OS=Neisseria gonorrhoeae (strain ATCC 700825 / FA 1090) GN=ubiE PE=3 SV=1 - [UBIE_NEIG1]	5.56515	10.2	1	2	2	2	1.04241	2	2.96052	1.77518	2	1.40952	1.39844	2	15.8294	8.15398e+06	245	27.383	7.72314
Q5F9S2	DNA repair protein RecN OS=Neisseria gonorrhoeae (strain ATCC 700825 / FA 1090) GN=NGO_0318 PE=3 SV=1 - [Q5F9S2_NEIG1]	3.0175	5.21	1	2	2	2	1.08659	2	33.0219	1.75627	2	13.1134	1.3885	2	9.4702	1.54283e+07	557	61.0943	5.32568
Q5F9T5	Integration host factor subunit alpha OS=Neisseria gonorrhoeae (strain ATCC 700825 / FA 1090) GN=ihfA PE=3 SV=1 - [IHFA_NEIG1]	3.39589	19	1	2	2	2	0.935461	2	26.5456	1.18235	2	10.1185	1.25555	2	0.852741	1.54295e+07	100	11.385	8.99756
Q5F9U0	Phenylalanine--tRNA ligase alpha subunit OS=Neisseria gonorrhoeae (strain ATCC 700825 / FA 1090) GN=pheS PE=3 SV=2 - [SYFA_NEIG1]	6.50975	7.29	1	2	2	2	0.993254	2	5.04566	1.59565	2	33.7347	1.89561	2	100.401	1.69412e+07	329	37.1978	5.46533
Q5F9U3	Translation initiation factor IF-3 OS=Neisseria gonorrhoeae (strain ATCC 700825 / FA 1090) GN=infC PE=3 SV=1 - [IF3_NEIG1]	7.31695	17.34	1	2	2	2	0.914314	2	6.88558	1.40482	2	6.97558	1.31626	2	17.1325	1.96069e+07	173	19.7664	9.31982
Q5F9W4	Ribosomal RNA small subunit methyltransferase A OS=Neisseria gonorrhoeae (strain ATCC 700825 / FA 1090) GN=rsmA PE=3 SV=1 - [RSMA_NEIG1]	5.50412	10.04	1	2	2	2	0.715423	2	7.30092	1.35065	2	30.6646	0.91476	2	39.1502	1.22259e+07	259	29.2175	7.1958
Q5F9W5	GTP pyrophosphokinase OS=Neisseria gonorrhoeae (strain ATCC 700825 / FA 1090) GN=NGO_0271 PE=4 SV=1 - [Q5F9W5_NEIG1]	1.8136	8.47	1	2	2	2	0.743663	2	17.4893	1.02297	2	31.1345	0.847648	2	36.0731	7.21744e+06	189	22.4465	8.92432
Q5F9W8	Uncharacterized protein OS=Neisseria gonorrhoeae (strain ATCC 700825 / FA 1090) GN=NGO_0268 PE=4 SV=2 - [Q5F9W8_NEIG1]	6.15381	13.45	1	2	2	2	0.927027	2	21.3704	2.08416	2	15.2485	2.02138	2	11.532	7.08932e+06	119	14.1327	4.24658
Q5FA11	Inorganic pyrophosphatase OS=Neisseria gonorrhoeae (strain ATCC 700825 / FA 1090) GN=ppa PE=3 SV=1 - [Q5FA11_NEIG1]	6.24833	10.73	1	2	2	2	0.96926	2	18.2432	2.3203	2	2.79825	2.11341	2	0.285337	1.32078e+07	177	19.7551	4.91943
Q5FA22	1-(5-phosphoribosyl)-5-[(5-phosphoribosylamino)methylideneamino] imidazole-4-carboxamide isomerase OS=Neisseria gonorrhoeae (strain ATCC 700825 / FA 1090) GN=hisA PE=3 SV=1 - [HIS4_NEIG1]	5.15184	5.71	1	2	2	2	0.754428	2	2.31363	1.71276	2	24.5462	1.33686	2	28.7226	1.09893e+07	245	25.8485	5.22412
Q5FA49	Sec-independent protein translocase protein TatA OS=Neisseria gonorrhoeae (strain ATCC 700825 / FA 1090) GN=tatA PE=3 SV=1 - [TATA_NEIG1]	6.25904	31.34	1	2	2	3	1.15587	3	4.6855	2.26528	3	4.22366	1.76229	3	0.675811	3.82631e+07	67	7.39994	6.78564
Q5FA72	Aminopeptidase N OS=Neisseria gonorrhoeae (strain ATCC 700825 / FA 1090) GN=pepN PE=4 SV=1 - [Q5FA72_NEIG1]	6.52431	2.08	1	2	2	3	0.90624	2	15.8146	1.66516	2	7.19697	1.54796	2	10.2499	1.91078e+07	867	97.4551	5.33838
Q5FA83	Porphobilinogen deaminase OS=Neisseria gonorrhoeae (strain ATCC 700825 / FA 1090) GN=hemC PE=3 SV=1 - [Q5FA83_NEIG1]	6.07878	9	1	2	2	2	0.678239	2	16.6768	1.88592	2	161.183	1.61172	2	213.261	6.07146e+06	311	33.5926	6.06201
Q5FAA9	N-acetyl-gamma-glutamyl-phosphate reductase OS=Neisseria gonorrhoeae (strain ATCC 700825 / FA 1090) GN=argC PE=3 SV=1 - [ARGC_NEIG1]	6.16858	11.82	1	2	2	2	0.751521	2	16.9308	1.11779	2	37.153	0.930003	2	45.4576	1.02491e+07	347	37.152	6.44287
Q5FAB8	Oxidoreductase OS=Neisseria gonorrhoeae (strain ATCC 700825 / FA 1090) GN=NGO_0108 PE=4 SV=1 - [Q5FAB8_NEIG1]	8.69107	16.77	1	2	2	3	0.8571	3	36.7349	3.39772	3	20.2309	2.81405	3	0.934056	1.09002e+08	161	17.8499	4.83057
Q5FAC6	Probable GTP-binding protein EngB OS=Neisseria gonorrhoeae (strain ATCC 700825 / FA 1090) GN=engB PE=3 SV=2 - [ENGB_NEIG1]	10.4284	12.92	1	2	2	3	0.819282	3	7.22636	1.99082	3	28.3698	2.07962	3	60.9173	8.62633e+06	209	23.5854	9.5249
Q5FAE0	Glycosyl transferase family 1 OS=Neisseria gonorrhoeae (strain ATCC 700825 / FA 1090) GN=NGO_0086 PE=4 SV=1 - [Q5FAE0_NEIG1]	5.70131	5.15	1	2	2	2	1.06422	2	11.0675	1.57657	2	10.0588	1.70687	2	2.73196	9.05368e+06	388	44.1127	8.41162
Q5FAI1	tRNA-2-methylthio-N(6)-dimethylallyladenosine synthase OS=Neisseria gonorrhoeae (strain ATCC 700825 / FA 1090) GN=miaB PE=3 SV=1 - [MIAB_NEIG1]	15.1301	7.01	1	2	2	3	0.85411	3	18.2003	1.29753	3	21.5837	1.53614	3	4.99942	2.62214e+07	442	49.6203	5.36377
Q5FAI2	1-deoxy-D-xylulose-5-phosphate synthase OS=Neisseria gonorrhoeae (strain ATCC 700825 / FA 1090) GN=dxs PE=3 SV=1 - [DXS_NEIG1]	2.00054	4.87	1	2	2	2	0.97119	2	38.3263	1.89812	2	0.972251	1.62599	2	7.95118	3.40509e+07	637	68.7683	6.26514
Q5FAK5	Orotate phosphoribosyltransferase OS=Neisseria gonorrhoeae (strain ATCC 700825 / FA 1090) GN=pyrE PE=3 SV=1 - [PYRE_NEIG1]	8.30563	12.68	1	2	2	3	0.921939	3	17.563	1.61603	3	5.82033	1.15603	3	5.98336	1.3283e+07	213	23.2532	8.77783
A0A0H4IS83	50S ribosomal protein L36 OS=Neisseria gonorrhoeae (strain ATCC 700825 / FA 1090) GN=rpmJ PE=3 SV=1 - [A0A0H4IS83_NEIG1]	1.61195	16.22	1	1	1	1	0.637906	1		1.7203	1		1.43501	1		524759462	37	4.4705	11.7954
A0A0H4IS99	Uncharacterized protein OS=Neisseria gonorrhoeae (strain ATCC 700825 / FA 1090) GN=NGO_10520 PE=4 SV=1 - [A0A0H4IS99_NEIG1]	0	16.9	1	1	1	2	1.22873	2	6.1181	1.63075	2	0.925177	1.24228	2	34.7459	7.64774e+06	71	8.44152	9.70068
A0A0H4IT76	Type II restriction enzyme NgoPII OS=Neisseria gonorrhoeae (strain ATCC 700825 / FA 1090) GN=NGO_09570 PE=4 SV=1 - [A0A0H4IT76_NEIG1]	2.62733	3.51	1	1	1	2	0.702952	1		1.11148	1		0.874437	1		2.9547e+08	171	19.7565	9.77393
A0A0H4IWE0	Membrane fusogenic activity family protein OS=Neisseria gonorrhoeae (strain ATCC 700825 / FA 1090) GN=NGO_08205 PE=4 SV=1 - [A0A0H4IWE0_NEIG1]	4.14236	16.98	1	1	1	3	1.04965	3	31.5415	1.21292	3	32.2273	0.914331	3	15.9577	6.05279e+06	106	11.58	4.94482
A0A0H4IWI5	Cytochrome B561 OS=Neisseria gonorrhoeae (strain ATCC 700825 / FA 1090) GN=NGO_10685 PE=4 SV=1 - [A0A0H4IWI5_NEIG1]	2.41933	5.98	1	1	1	1	1.13067	1		1.17236	1		0.685915	1		4.52011e+07	117	12.7409	10.9751
A0A0H4J5E9	Methyltransferase OS=Neisseria gonorrhoeae (strain ATCC 700825 / FA 1090) GN=NGO_02845 PE=4 SV=1 - [A0A0H4J5E9_NEIG1]	0	3.94	1	1	1	2											508	57.1289	5.45264
A0A0H4J5Y2	Uncharacterized protein OS=Neisseria gonorrhoeae (strain ATCC 700825 / FA 1090) GN=NGO_09870 PE=4 SV=1 - [A0A0H4J5Y2_NEIG1]	2.50668	5.26	1	1	1	1	1.58505	1		1.39165	1		2.4623	1		1.94041e+07	209	23.3135	5.26221
O87406	UPF0070 protein NGO0425 OS=Neisseria gonorrhoeae (strain ATCC 700825 / FA 1090) GN=NGO0425 PE=3 SV=1 - [Y425_NEIG1]	2.11282	8.61	1	1	1	1	1.03855	1		1.36069	1		1.08504	1		1.3905e+07	209	23.1349	5.41455
Q5F4W9	Maf-like protein NGO2175 OS=Neisseria gonorrhoeae (strain ATCC 700825 / FA 1090) GN=NGO2175 PE=3 SV=1 - [Y2175_NEIG1]	2.56408	3.06	1	1	1	1	0.705299	1		0.721594	1		0.524344	1		3.7601e+09	196	21.6642	5.88428
Q5F4X8	Lipid A export ATP-binding/permease protein MsbA OS=Neisseria gonorrhoeae (strain ATCC 700825 / FA 1090) GN=msbA PE=3 SV=1 - [MSBA_NEIG1]	2.15005	3.22	1	1	1	1	0.983341	1		0.921801	1		1.24685	1		1.68195e+07	622	68.759	8.11865
Q5F4Y9	ATP synthase epsilon chain OS=Neisseria gonorrhoeae (strain ATCC 700825 / FA 1090) GN=atpC PE=3 SV=1 - [ATPE_NEIG1]	3.96157	7.14	1	1	1	1	0.900931	1		2.43363	1		1.83549	1		8.43366e+06	140	14.978	6.32861
Q5F4Z1	ATP synthase gamma chain OS=Neisseria gonorrhoeae (strain ATCC 700825 / FA 1090) GN=atpG PE=3 SV=1 - [ATPG_NEIG1]	0	3.09	1	1	1	1	0.954414	1		1.65174	1		1.10494	1		2.83383e+07	291	32.4318	8.89502
Q5F4Z5	ATP synthase subunit c OS=Neisseria gonorrhoeae (strain ATCC 700825 / FA 1090) GN=NGO_2145 PE=4 SV=1 - [Q5F4Z5_NEIG1]	3.24074	8.97	1	1	1	1	0.997712	1		1.39352	1		0.790908	1		7.82283e+07	78	7.81038	6.39209
Q5F4Z9	Chromosome partitioning protein ParB OS=Neisseria gonorrhoeae (strain ATCC 700825 / FA 1090) GN=NGO_2141 PE=3 SV=1 - [Q5F4Z9_NEIG1]	2.11779	5.59	1	1	1	1	0.742199	1		1.01727	1		1.00197	1		6.23893e+06	286	31.513	9.01221
Q5F538	Diaminopimelate decarboxylase OS=Neisseria gonorrhoeae (strain ATCC 700825 / FA 1090) GN=lysA PE=3 SV=1 - [Q5F538_NEIG1]	0	1.72	1	1	1	1	0.775322	1		2.73736	1		1.82763	1		2.05745e+07	406	43.6215	5.60498
Q5F540	Transporter OS=Neisseria gonorrhoeae (strain ATCC 700825 / FA 1090) GN=NGO_2096 PE=3 SV=1 - [Q5F540_NEIG1]	1.98557	2.27	1	1	1	1	0.747765	1		1.34846	1		0.749219	1		2.06063e+06	528	56.7358	8.52881
Q5F569	UDP-3-O-acyl-N-acetylglucosamine deacetylase OS=Neisseria gonorrhoeae (strain ATCC 700825 / FA 1090) GN=lpxC PE=3 SV=1 - [LPXC_NEIG1]	3.26756	4.23	1	1	1	1	1.14518	1		2.20669	1		2.24286	1		1.02859e+07	307	33.8994	5.41455
Q5F577	Bifunctional protein GlmU OS=Neisseria gonorrhoeae (strain ATCC 700825 / FA 1090) GN=glmU PE=3 SV=1 - [GLMU_NEIG1]	3.09813	1.54	1	1	1	1	0.909561	1		1.84697	1		2.53534	1		4.13602e+07	456	48.8428	7.31299
Q5F589	NUDIX hydrolase OS=Neisseria gonorrhoeae (strain ATCC 700825 / FA 1090) GN=NGO_2040 PE=4 SV=1 - [Q5F589_NEIG1]	0	6.19	1	1	1	1	1.07185	1		1.99352	1		1.37864	1		1.03893e+06	291	32.3292	5.80811
Q5F591	Phosphoenolpyruvate-protein phosphotransferase OS=Neisseria gonorrhoeae (strain ATCC 700825 / FA 1090) GN=NGO_2038 PE=3 SV=1 - [Q5F591_NEIG1]	0	3.55	1	1	1	1	1.18837	1		1.39944	1		1.20785	1		2.825e+07	591	64.9387	6.06201
Q5F5A0	Ubiquinol-cytochrome c reductase iron-sulfur subunit OS=Neisseria gonorrhoeae (strain ATCC 700825 / FA 1090) GN=NGO_2029 PE=4 SV=1 - [Q5F5A0_NEIG1]	0	10.88	1	1	1	4	0.511216	1		0.763574	1		0.475144	1		8.01664e+07	193	20.6355	5.63037
Q5F5A1	GTP cyclohydrolase 1 type 2 homolog OS=Neisseria gonorrhoeae (strain ATCC 700825 / FA 1090) GN=NGO_2028 PE=3 SV=1 - [Q5F5A1_NEIG1]	2.28695	4.02	1	1	1	1	1.0678	1		1.99838	1		2.20828	1		1.94681e+07	249	27.397	6.21436
Q5F5A7	Uncharacterized protein OS=Neisseria gonorrhoeae (strain ATCC 700825 / FA 1090) GN=NGO_2022 PE=4 SV=1 - [Q5F5A7_NEIG1]	3.58399	9.17	1	1	1	1	1.13763	1		3.94376	1		3.83365	1		9.49617e+06	109	12.7097	5.60498
Q5F5B8	Amino acid ABC transporter permease OS=Neisseria gonorrhoeae (strain ATCC 700825 / FA 1090) GN=NGO_2011 PE=3 SV=1 - [Q5F5B8_NEIG1]	2.17502	3.2	1	1	1	1	0.733819	1		1.48637	1		1.35633	1		268833642	219	24.0753	9.5835
Q5F5B9	Protease TldD OS=Neisseria gonorrhoeae (strain ATCC 700825 / FA 1090) GN=tldD PE=4 SV=1 - [Q5F5B9_NEIG1]	0	2.5	1	1	1	1	0.645491	1		2.71695	1		2.18288	1		740452	480	50.6677	6.22705
Q5F5D0	Bifunctional protein FolD OS=Neisseria gonorrhoeae (strain ATCC 700825 / FA 1090) GN=folD PE=3 SV=1 - [FOLD_NEIG1]	3.01912	4.23	1	1	1	1	1.19754	1		0.989337	1		1.25679	1		8.84762e+06	284	29.9817	5.8208
Q5F5D1	RDD family protein OS=Neisseria gonorrhoeae (strain ATCC 700825 / FA 1090) GN=NGO_1998 PE=4 SV=1 - [Q5F5D1_NEIG1]	1.75978	6.74	1	1	1	1	1.06813	1		1.17469	1		0.82149	1		2.10359e+06	193	21.1185	8.36768
Q5F5D2	Aspartate-semialdehyde dehydrogenase OS=Neisseria gonorrhoeae (strain ATCC 700825 / FA 1090) GN=asd PE=3 SV=1 - [Q5F5D2_NEIG1]	2.12304	1.89	1	1	1	1	0.684242	1		1.63409	1		1.37374	1		1.90132e+07	371	39.8113	5.63037
Q5F5E1	Ribosomal RNA small subunit methyltransferase I OS=Neisseria gonorrhoeae (strain ATCC 700825 / FA 1090) GN=rsmI PE=3 SV=1 - [Q5F5E1_NEIG1]	2.87002	4.47	1	1	1	1	0.846973	1		1.02833	1		1.031	1		8.84559e+06	291	31.2395	8.36768
Q5F5E3	Phosphoheptose isomerase OS=Neisseria gonorrhoeae (strain ATCC 700825 / FA 1090) GN=gmhA PE=1 SV=1 - [GMHA_NEIG1]	2.89997	6.09	1	1	1	1	1.04752	1		1.48905	1		1.30763	1		1.58835e+07	197	21.0796	5.73193
Q5F5E6	Methionine aminopeptidase OS=Neisseria gonorrhoeae (strain ATCC 700825 / FA 1090) GN=map PE=3 SV=1 - [Q5F5E6_NEIG1]	3.27543	5.02	1	1	1	1	0.773808	1		1.11357	1		1.0175	1		4.75329e+06	259	28.1983	6.7417
Q5F5F9	Uncharacterized protein OS=Neisseria gonorrhoeae (strain ATCC 700825 / FA 1090) GN=NGO_1969 PE=4 SV=1 - [Q5F5F9_NEIG1]	3.3907	14.49	1	1	1	1	0.683169	1		1.91044	1		1.71883	1		1.1327e+07	69	8.01519	4.97021
Q5F5G3	Protease OS=Neisseria gonorrhoeae (strain ATCC 700825 / FA 1090) GN=NGO_1963 PE=4 SV=1 - [Q5F5G3_NEIG1]	0	4.57	1	1	1	1	0.867207	1		1.37615	1		1.01822	1		2.6681e+07	328	35.9408	9.40771
Q5F5I2	Uncharacterized protein OS=Neisseria gonorrhoeae (strain ATCC 700825 / FA 1090) GN=NGO_1943 PE=4 SV=2 - [Q5F5I2_NEIG1]	2.26366	8.57	1	1	1	1	0.819966	1		1.12638	1		0.902577	1		25994862	70	8.26243	9.93506
Q5F5J7	Uncharacterized protein OS=Neisseria gonorrhoeae (strain ATCC 700825 / FA 1090) GN=NGO_1927 PE=4 SV=1 - [Q5F5J7_NEIG1]	2.33068	9.16	1	1	1	1	1.77956	1		1.56345	1		2.35039	1		6.6131e+07	131	14.8017	10.1401
Q5F5K2	GMP synthase OS=Neisseria gonorrhoeae (strain ATCC 700825 / FA 1090) GN=NGO_1922 PE=4 SV=1 - [Q5F5K2_NEIG1]	4.09676	5.09	1	1	1	1	0.923867	1		1.40838	1		1.14742	1		1.46477e+07	216	23.8277	9.17334
Q5F5L7	RNA-binding protein OS=Neisseria gonorrhoeae (strain ATCC 700825 / FA 1090) GN=NGO_1906 PE=4 SV=1 - [Q5F5L7_NEIG1]	7.74613	6.67	1	1	1	2	1.80375	2	10.8522	1.9853	2	11.8843	3.02986	2	0.524805		135	15.5077	8.32373
Q5F5M5	UDP-glucose 4-epimerase OS=Neisseria gonorrhoeae (strain ATCC 700825 / FA 1090) GN=NGO_1896 PE=4 SV=1 - [Q5F5M5_NEIG1]	3.54188	4.44	1	1	1	1	0.968842	1		1.27156	1		1.11446	1		6.44796e+06	338	36.8615	6.80029
Q5F5M6	Transcription accessory protein OS=Neisseria gonorrhoeae (strain ATCC 700825 / FA 1090) GN=NGO_1895 PE=4 SV=1 - [Q5F5M6_NEIG1]	2.40953	1.45	1	1	1	1	1.39183	1		1.54596	1		1.80123	1		2.92996e+06	757	83.2189	6.37939
Q5F5N9	PhnO OS=Neisseria gonorrhoeae (strain ATCC 700825 / FA 1090) GN=NGO_1878 PE=4 SV=1 - [Q5F5N9_NEIG1]	3.54045	6.43	1	1	1	1	0.893097	1		1.53088	1		1.12817	1		1.02222e+07	280	31.59	7.45947
Q5F5Q2	DNA processing protein DprA OS=Neisseria gonorrhoeae (strain ATCC 700825 / FA 1090) GN=NGO_1865 PE=4 SV=1 - [Q5F5Q2_NEIG1]	2.25179	2.28	1	1	1	1	1.92057	1		1.21663	1		1.76003	1		7.15099e+06	395	41.8264	6.3667
Q5F5Q4	DNA topoisomerase 1 OS=Neisseria gonorrhoeae (strain ATCC 700825 / FA 1090) GN=topA PE=3 SV=1 - [Q5F5Q4_NEIG1]	0	2.6	1	1	1	1	5.44707	1		0.952173	1		10.474	1			768	86.9932	7.97217
Q5F5T6	30S ribosomal protein S17 OS=Neisseria gonorrhoeae (strain ATCC 700825 / FA 1090) GN=rpsQ PE=3 SV=1 - [RS17_NEIG1]	4.19079	11.49	1	1	1	1	0.801391	1		1.74051	1		1.25114	1		5.66717e+07	87	9.81435	9.78857
Q5F5U7	Protein translocase subunit SecY OS=Neisseria gonorrhoeae (strain ATCC 700825 / FA 1090) GN=secY PE=3 SV=1 - [Q5F5U7_NEIG1]	2.65846	1.83	1	1	1	1	0.869601	1		1.7541	1		1.22424	1		1.11505e+07	436	47.4956	9.75928
Q5F5V4	Probable septum site-determining protein MinC OS=Neisseria gonorrhoeae (strain ATCC 700825 / FA 1090) GN=minC PE=3 SV=1 - [MINC_NEIG1]	3.80827	4.22	1	1	1	1	0.813121	1		2.68586	1		2.06675	1		30727409	237	26.2515	5.92236
Q5F5V8	tRNA pseudouridine synthase A OS=Neisseria gonorrhoeae (strain ATCC 700825 / FA 1090) GN=truA PE=3 SV=1 - [TRUA_NEIG1]	3.08012	5.66	1	1	1	1	1.06232	1		1.36745	1		1.55171	1		8.775e+06	265	28.788	9.81787
Q5F5X0	1-deoxy-D-xylulose 5-phosphate reductoisomerase OS=Neisseria gonorrhoeae (strain ATCC 700825 / FA 1090) GN=dxr PE=3 SV=1 - [DXR_NEIG1]	2.52256	1.52	1	1	1	1	0.980653	1		1.85718	1		1.81034	1		9.01444e+06	394	41.9965	6.32861
Q5F5X2	Isoprenyl transferase OS=Neisseria gonorrhoeae (strain ATCC 700825 / FA 1090) GN=uppS PE=3 SV=1 - [ISPT_NEIG1]	3.03219	6.05	1	1	1	1	0.875911	1		1.40122	1		1.18026	1		9.27467e+06	248	28.3277	8.1626
Q5F5X5	Membrane protein OS=Neisseria gonorrhoeae (strain ATCC 700825 / FA 1090) GN=NGO_1793 PE=4 SV=2 - [Q5F5X5_NEIG1]	2.25439	4.27	1	1	1	1	1.38894	1		2.26208	1		1.40539	1		3.25303e+07	375	42.3724	10.6528
Q5F5Y1	Sodium:alanine symporter OS=Neisseria gonorrhoeae (strain ATCC 700825 / FA 1090) GN=NGO_1787 PE=3 SV=1 - [Q5F5Y1_NEIG1]	2.7066	4.63	1	1	1	1	0.824031	1		1.97754	1		1.11622	1		768517	475	51.7069	8.38232
Q5F5Y6	Lipid-A-disaccharide synthase OS=Neisseria gonorrhoeae (strain ATCC 700825 / FA 1090) GN=lpxB PE=3 SV=1 - [LPXB_NEIG1]	0	3.33	1	1	1	1	0.59701	1		1.11584	1		0.749154	1		1.025e+07	390	43.0372	8.646
Q5F5Z2	Glyceraldehyde-3-phosphate dehydrogenase OS=Neisseria gonorrhoeae (strain ATCC 700825 / FA 1090) GN=gapA PE=3 SV=1 - [Q5F5Z2_NEIG1]	3.36421	2.92	1	1	1	1	0.856584	1		2.39261	1		2.04889	1		1.12746e+07	343	36.942	6.72705
Q5F5Z9	Cytochrome C peroxidase OS=Neisseria gonorrhoeae (strain ATCC 700825 / FA 1090) GN=NGO_1769 PE=4 SV=1 - [Q5F5Z9_NEIG1]	0	3.88	1	1	1	1	0.713568	1		0.799714	1		0.6202	1		20476642	387	41.9279	5.79541
Q5F607	Uncharacterized protein OS=Neisseria gonorrhoeae (strain ATCC 700825 / FA 1090) GN=NGO_1759 PE=4 SV=1 - [Q5F607_NEIG1]	0	12.61	1	1	1	2	0.448067	1		0.626789	1		0.456189	1		2.17029e+06	111	12.3293	6.55127
Q5F618	NADH-quinone oxidoreductase subunit D OS=Neisseria gonorrhoeae (strain ATCC 700825 / FA 1090) GN=nuoD PE=3 SV=1 - [NUOD_NEIG1]	4.99895	3.59	1	1	1	2	0.923485	2	8.28258	1.66728	2	6.60116	1.26576	2	7.92955	7.23281e+06	418	47.563	7.03467
Q5F627	Uncharacterized protein OS=Neisseria gonorrhoeae (strain ATCC 700825 / FA 1090) GN=NGO_1739 PE=4 SV=1 - [Q5F627_NEIG1]	4.8745	1.81	1	1	1	2	0.714106	2	19.7923	1.8563	2	13.8373	1.57869	2	0.607679	3.91824e+07	387	44.9428	8.19189
Q5F631	Geranyl transferase OS=Neisseria gonorrhoeae (strain ATCC 700825 / FA 1090) GN=NGO_1735 PE=3 SV=1 - [Q5F631_NEIG1]	2.44799	3.36	1	1	1	1	0.786518	1		1.27094	1		1.03188	1		7.69023e+06	298	31.7003	5.84619
Q5F637	Peptidase OS=Neisseria gonorrhoeae (strain ATCC 700825 / FA 1090) GN=NGO_1729 PE=4 SV=1 - [Q5F637_NEIG1]	0	19.44	1	1	1	1	0.704245	1		1.67378	1		1.67322	1		3.206e+07	108	11.745	6.85889
Q5F639	tRNA (cytidine(34)-2'-O)-methyltransferase OS=Neisseria gonorrhoeae (strain ATCC 700825 / FA 1090) GN=trmL PE=3 SV=1 - [Q5F639_NEIG1]	3.12266	7.14	1	1	1	1	1.27451	1		1.60263	1		1.62264	1		1.61281e+07	154	16.8348	8.48486
Q5F650	Aminoglycoside phosphotransferase OS=Neisseria gonorrhoeae (strain ATCC 700825 / FA 1090) GN=NGO_1716 PE=4 SV=1 - [Q5F650_NEIG1]	1.78038	3.59	1	1	1	1	0.987113	1		1.36078	1		0.954342	1		1.81179e+06	334	38.8291	5.32568
Q5F673	Membrane protein OS=Neisseria gonorrhoeae (strain ATCC 700825 / FA 1090) GN=NGO_1690 PE=4 SV=1 - [Q5F673_NEIG1]	2.61661	8.64	1	1	1	1	0.680938	1		0.832257	1		0.754615	1		1.68704e+07	81	9.49297	9.62744
Q5F699	Uncharacterized protein OS=Neisseria gonorrhoeae (strain ATCC 700825 / FA 1090) GN=NGO_1663 PE=4 SV=1 - [Q5F699_NEIG1]	0	13.46	1	1	1	1	1.32955	1		1.18435	1		1.04124	1		1.90877e+07	104	11.3375	10.4331
Q5F6A0	Lipopolysaccharide assembly protein B OS=Neisseria gonorrhoeae (strain ATCC 700825 / FA 1090) GN=lapB PE=3 SV=1 - [Q5F6A0_NEIG1]	2.59363	2.57	1	1	1	2	1.07176	2	24.891	1.51176	2	8.27418	1.51609	2	1.27693	4.87027e+06	389	44.4746	7.13721
Q5F6A2	Uncharacterized protein OS=Neisseria gonorrhoeae (strain ATCC 700825 / FA 1090) GN=NGO_1658 PE=4 SV=2 - [Q5F6A2_NEIG1]	2.22729	6.52	1	1	1	1	0.711443	1		2.06499	1		1.89992	1		4.38247e+06	92	10.1702	5.18604
Q5F6C9	Repressor OS=Neisseria gonorrhoeae (strain ATCC 700825 / FA 1090) GN=NGO_1630 PE=4 SV=1 - [Q5F6C9_NEIG1]	1.97523	4.78	1	1	1	1	0.793603	1		1.01553	1		0.79765	1		3.2494e+06	251	27.8784	5.64307
Q5F6D2	Uncharacterized protein OS=Neisseria gonorrhoeae (strain ATCC 700825 / FA 1090) GN=NGO_1627 PE=4 SV=1 - [Q5F6D2_NEIG1]	2.91821	12.78	1	1	1	1	0.870349	1		1.21885	1		1.13624	1		5.68101e+06	133	14.6251	4.93213
Q5F6F0	D-arabinose 5-phosphate isomerase OS=Neisseria gonorrhoeae (strain ATCC 700825 / FA 1090) GN=NGO_1609 PE=3 SV=2 - [Q5F6F0_NEIG1]	3.59811	5.56	1	1	1	1	1.0172	1		1.89049	1		1.85808	1		7.528e+06	324	34.1276	6.1001
Q5F6F4	Sugar ABC transporter ATP-binding protein OS=Neisseria gonorrhoeae (strain ATCC 700825 / FA 1090) GN=NGO_1605 PE=4 SV=1 - [Q5F6F4_NEIG1]	3.01194	4.51	1	1	1	1	0.919024	1		1.11436	1		0.845032	1		2.80397e+06	244	26.9946	9.43701
Q5F6F6	Monofunctional biosynthetic peptidoglycan transglycosylase OS=Neisseria gonorrhoeae (strain ATCC 700825 / FA 1090) GN=mtgA PE=3 SV=1 - [MTGA_NEIG1]	2.30812	3.43	1	1	1	1	1.40468	1		1.24624	1		1.11005	1		9.76325e+06	233	26.6258	9.75928
Q5F6H5	Anhydro-N-acetylmuramic acid kinase OS=Neisseria gonorrhoeae (strain ATCC 700825 / FA 1090) GN=anmK PE=3 SV=2 - [ANMK_NEIG1]	2.18463	5.72	1	1	1	1	0.619288	1		1.71942	1		1.27451	1		58360438	367	39.969	6.39209
Q5F6I9	Nicotinate-nucleotide pyrophosphorylase OS=Neisseria gonorrhoeae (strain ATCC 700825 / FA 1090) GN=NGO_1565 PE=3 SV=1 - [Q5F6I9_NEIG1]	2.05266	6.14	1	1	1	1	0.848902	1		1.07165	1		0.854649	1		1.50451e+06	293	31.171	5.51611
Q5F6J3	Exodeoxyribonuclease III OS=Neisseria gonorrhoeae (strain ATCC 700825 / FA 1090) GN=NGO_1561 PE=4 SV=1 - [Q5F6J3_NEIG1]	0	5.86	1	1	1	1	0.731113	1		0.967898	1		0.866023	1		6.98597e+06	256	29.1638	5.8208
Q5F6L2	UDP-N-acetylmuramoyl-tripeptide--D-alanyl-D-alanine ligase OS=Neisseria gonorrhoeae (strain ATCC 700825 / FA 1090) GN=murF PE=3 SV=1 - [Q5F6L2_NEIG1]	6.57641	3.1	1	1	1	2	0.82295	2	23.8855	1.42243	2	11.6632	1.11899	2	5.87436	1.27115e+07	452	47.7432	5.18604
Q5F6M0	D-alanine--D-alanine ligase OS=Neisseria gonorrhoeae (strain ATCC 700825 / FA 1090) GN=ddl PE=3 SV=1 - [DDL_NEIG1]	3.28655	6.25	1	1	1	1	0.760046	1		2.42065	1		1.94354	1		1.53619e+07	304	32.6576	4.93213
Q5F6M1	Cell division protein FtsQ OS=Neisseria gonorrhoeae (strain ATCC 700825 / FA 1090) GN=ftsQ PE=3 SV=1 - [FTSQ_NEIG1]	2.75923	5.37	1	1	1	1	1.29984	1		1.49555	1		1.27851	1		8.10337e+06	242	27.8903	9.46631
Q5F6S4	NADPH quinone reductase MdaB OS=Neisseria gonorrhoeae (strain ATCC 700825 / FA 1090) GN=NGO_1473 PE=4 SV=1 - [Q5F6S4_NEIG1]	2.56853	5.73	1	1	1	1	0.887384	1		2.56229	1		1.83454	1		1.12038e+07	192	21.7718	6.65381
Q5F6S5	NAD(P) transhydrogenase subunit beta OS=Neisseria gonorrhoeae (strain ATCC 700825 / FA 1090) GN=pntB PE=3 SV=1 - [Q5F6S5_NEIG1]	3.07163	2.82	1	1	1	1	1.00201	1		1.34044	1		1.02627	1		2.12997e+07	461	48.4613	5.77002
Q5F6U6	Lactate permease OS=Neisseria gonorrhoeae (strain ATCC 700825 / FA 1090) GN=NGO_1449 PE=4 SV=1 - [Q5F6U6_NEIG1]	0	3.03	1	1	1	3	1.18592	3	10.2882	1.96979	3	15.0055	1.0465	3	20.5307	1.33606e+07	528	56.6832	8.76318
Q5F6U9	Autotransporter adhesin OS=Neisseria gonorrhoeae (strain ATCC 700825 / FA 1090) GN=NGO_1446 PE=4 SV=1 - [Q5F6U9_NEIG1]	0	9.32	1	1	1	1	0.791327	1		1.42255	1		1.26912	1		1.71567e+07	161	17.4283	10.7114
Q5F6W2	Uncharacterized protein OS=Neisseria gonorrhoeae (strain ATCC 700825 / FA 1090) GN=NGO_1432 PE=4 SV=1 - [Q5F6W2_NEIG1]	2.96611	3.38	1	1	1	1	1.06778	1		1.56749	1		1.20124	1		3.60386e+06	325	34.9577	9.61279
Q5F6W4	TonB-dependent receptor OS=Neisseria gonorrhoeae (strain ATCC 700825 / FA 1090) GN=NGO_1430 PE=4 SV=2 - [Q5F6W4_NEIG1]	0	5.68	1	1	1	1	1.8527	1		1.43086	1		2.62195	1			405	45.8305	7.10791
Q5F6X0	Serine acetyltransferase OS=Neisseria gonorrhoeae (strain ATCC 700825 / FA 1090) GN=NGO_1423 PE=4 SV=1 - [Q5F6X0_NEIG1]	2.10166	2.21	1	1	1	1	0.981702	1		2.13766	1		1.99641	1		1.05835e+07	272	29.3021	6.96143
Q5F6X8	Na(+)-translocating NADH-quinone reductase subunit C OS=Neisseria gonorrhoeae (strain ATCC 700825 / FA 1090) GN=nqrC PE=3 SV=1 - [Q5F6X8_NEIG1]	2.67802	4.26	1	1	1	1	0.861233	1		1.54201	1		1.08566	1		6.70444e+06	258	27.6985	8.66064
Q5F6Y2	Sodium:proton antiporter OS=Neisseria gonorrhoeae (strain ATCC 700825 / FA 1090) GN=NGO_1411 PE=4 SV=2 - [Q5F6Y2_NEIG1]	2.4274	1.27	1	1	1	1	0.687843	1		1.15671	1		0.757607	1		4.53632e+07	473	51.6475	8.32373
Q5F6Z2	Copper-binding protein OS=Neisseria gonorrhoeae (strain ATCC 700825 / FA 1090) GN=NGO_1397 PE=4 SV=1 - [Q5F6Z2_NEIG1]	2.60291	8.54	1	1	1	1	1.38061	1		1.75528	1		1.24068	1		9.85772e+06	164	18.1541	6.01123
Q5F729	GntR family transcriptional regulator OS=Neisseria gonorrhoeae (strain ATCC 700825 / FA 1090) GN=NGO_1360 PE=4 SV=1 - [Q5F729_NEIG1]	2.40061	4.63	1	1	1	1	1.89749	1		1.84529	1		2.06636	1		44462601	259	29.483	6.62451
Q5F735	Beta-1,4-glucosyltransferase OS=Neisseria gonorrhoeae (strain ATCC 700825 / FA 1090) GN=NGO_1353 PE=4 SV=2 - [Q5F735_NEIG1]	0	7.54	1	1	1	1											252	29.3088	8.95361
Q5F749	Hydrolase OS=Neisseria gonorrhoeae (strain ATCC 700825 / FA 1090) GN=NGO_1338 PE=4 SV=1 - [Q5F749_NEIG1]	0	6.25	1	1	1	1	1.17185	1		0.894645	1		0.773056	1		743032	256	28.1087	6.55127
Q5F756	Chorismate synthase OS=Neisseria gonorrhoeae (strain ATCC 700825 / FA 1090) GN=aroC PE=3 SV=1 - [AROC_NEIG1]	2.60109	2.46	1	1	1	1	0.94738	1		1.68289	1		1.25194	1		4.14039e+06	366	39.3099	6.7124
Q5F757	tRNA/tmRNA (uracil-C(5))-methyltransferase OS=Neisseria gonorrhoeae (strain ATCC 700825 / FA 1090) GN=trmA PE=3 SV=1 - [TRMA_NEIG1]	3.07772	3.87	1	1	1	1	1.14914	1		1.24113	1		1.20686	1		2.05329e+07	362	41.2798	5.88428
Q5F775	Guanylate kinase OS=Neisseria gonorrhoeae (strain ATCC 700825 / FA 1090) GN=gmk PE=3 SV=1 - [KGUA_NEIG1]	0	5.85	1	1	1	1							0.873231	1		299337	205	22.4747	6.29053
Q5F776	DNA-directed RNA polymerase subunit omega OS=Neisseria gonorrhoeae (strain ATCC 700825 / FA 1090) GN=rpoZ PE=3 SV=1 - [RPOZ_NEIG1]	2.72441	20.59	1	1	1	1	0.582984	1		1.46434	1		1.2185	1		9.20116e+06	68	7.49494	9.0415
Q5F784	MORN repeat variant family protein OS=Neisseria gonorrhoeae (strain ATCC 700825 / FA 1090) GN=NGO_1299 PE=4 SV=1 - [Q5F784_NEIG1]	2.20049	6.94	1	1	1	1	1.40189	1		1.40417	1		1.97245	1		2.2044e+07	245	27.9041	9.43701
Q5F788	Alanine racemase OS=Neisseria gonorrhoeae (strain ATCC 700825 / FA 1090) GN=alr PE=3 SV=1 - [ALR_NEIG1]	3.57528	3.69	1	1	1	1	0.739075	1		1.70751	1		1.75609	1		4.80737e+07	352	38.8526	6.39209
Q5F796	GTP-binding protein OS=Neisseria gonorrhoeae (strain ATCC 700825 / FA 1090) GN=NGO_1287 PE=4 SV=1 - [Q5F796_NEIG1]	0	2.47	1	1	1	1	1.03589	1		1.10205	1		0.822184	1		640467	446	49.9495	6.22705
Q5F799	Ribosome maturation factor RimP OS=Neisseria gonorrhoeae (strain ATCC 700825 / FA 1090) GN=rimP PE=3 SV=1 - [RIMP_NEIG1]	0	4.03	1	1	1	1	1.06065	1		2.24267	1		2.21811	1		6.02472e+06	149	16.4496	5.64307
Q5F7D3	Membrane protein OS=Neisseria gonorrhoeae (strain ATCC 700825 / FA 1090) GN=NGO_1245 PE=4 SV=1 - [Q5F7D3_NEIG1]	2.64166	4.51	1	1	1	1	0.432263	1		0.707458	1		0.736901	1		4.15497e+07	288	32.7084	9.86182
Q5F7D7	Histidinol-phosphate aminotransferase OS=Neisseria gonorrhoeae (strain ATCC 700825 / FA 1090) GN=hisC PE=3 SV=1 - [HIS8_NEIG1]	2.6289	2.23	1	1	1	1	0.837262	1		1.70634	1		1.4207	1		1.03104e+07	359	39.2324	7.2251
Q5F7E1	AhpC/TSA family protein OS=Neisseria gonorrhoeae (strain ATCC 700825 / FA 1090) GN=NGO_1237 PE=4 SV=1 - [Q5F7E1_NEIG1]	0	9.68	1	1	1	1	1.01547	1		1.29788	1		0.953272	1		2.66279e+07	217	23.0927	5.2749
Q5F7E6	Ornithine carbamoyltransferase OS=Neisseria gonorrhoeae (strain ATCC 700825 / FA 1090) GN=argF PE=3 SV=1 - [OTC_NEIG1]	2.57188	1.81	1	1	1	1	0.871867	1		2.03713	1		2.08883	1		8.89895e+06	331	36.6536	6.1001
Q5F7H4	Anthranilate synthase component II OS=Neisseria gonorrhoeae (strain ATCC 700825 / FA 1090) GN=NGO_1204 PE=4 SV=1 - [Q5F7H4_NEIG1]	0	10.2	1	1	1	1	1.06018	1		1.53958	1		1.87314	1		411979	196	21.8479	5.71924
Q5F7H5	Anthranilate phosphoribosyltransferase OS=Neisseria gonorrhoeae (strain ATCC 700825 / FA 1090) GN=trpD PE=3 SV=1 - [TRPD_NEIG1]	4.25123	4.09	1	1	1	2	0.967285	2	17.4065	1.37741	2	1.55902	0.873807	2	8.42374	8.85215e+06	342	36.3657	5.89697
Q5F7H8	ATP-dependent helicase OS=Neisseria gonorrhoeae (strain ATCC 700825 / FA 1090) GN=NGO_1199 PE=4 SV=2 - [Q5F7H8_NEIG1]	0	1.32	1	1	1	2	0.738515	1		0.887911	1		0.326472	1			1064	120.423	9.02686
Q5F7H9	Protein DcaA OS=Neisseria gonorrhoeae (strain ATCC 700825 / FA 1090) GN=NGO_1198 PE=4 SV=1 - [Q5F7H9_NEIG1]	2.53571	1.34	1	1	1	1	1.40754	1		1.80994	1		1.43767	1		1.3914e+07	524	59.0101	8.14795
Q5F7I8	33 kDa chaperonin OS=Neisseria gonorrhoeae (strain ATCC 700825 / FA 1090) GN=hslO PE=3 SV=1 - [HSLO_NEIG1]	1.70979	2.98	1	1	1	1	0.932325	1		1.74519	1		1.40719	1		1.2559e+07	302	33.0566	4.83057
Q5F7J5	Nitrogen regulatory protein P-II 1 OS=Neisseria gonorrhoeae (strain ATCC 700825 / FA 1090) GN=NGO_1182 PE=3 SV=1 - [Q5F7J5_NEIG1]	6.17131	9.82	1	1	1	2	0.806259	2	18.8523	1.65082	2	21.3745	1.27774	2	16.2686	9.58299e+06	112	12.2897	5.63037
Q5F7L3	Uncharacterized protein OS=Neisseria gonorrhoeae (strain ATCC 700825 / FA 1090) GN=NGO_1158 PE=4 SV=1 - [Q5F7L3_NEIG1]	0	2.37	1	1	1	1	1.3727	1		1.25085	1		1.60634	1		3.3886e+06	422	45.3318	7.88428
Q5F7M0	Uncharacterized protein OS=Neisseria gonorrhoeae (strain ATCC 700825 / FA 1090) GN=NGO_1150 PE=4 SV=1 - [Q5F7M0_NEIG1]	0	3.91	1	1	1	1	0.737985	1		1.86257	1		1.82856	1		1.31472e+06	256	29.2308	5.2876
Q5F7M1	O-succinylhomoserine sulfhydrolase OS=Neisseria gonorrhoeae (strain ATCC 700825 / FA 1090) GN=NGO_1149 PE=3 SV=1 - [Q5F7M1_NEIG1]	3.2243	2.85	1	1	1	1	0.796293	1		1.20618	1		1.04655	1		1.75549e+07	386	41.5485	7.28369
Q5F7S3	Uncharacterized protein OS=Neisseria gonorrhoeae (strain ATCC 700825 / FA 1090) GN=NGO_1097 PE=4 SV=1 - [Q5F7S3_NEIG1]	0	2.13	1	1	1	1	0.613375	1		1.03435	1		0.858143	1		3.8477e+06	750	83.2358	5.43994
Q5F7U2	Acyl-CoA thioester hydrolase OS=Neisseria gonorrhoeae (strain ATCC 700825 / FA 1090) GN=NGO_1078 PE=4 SV=1 - [Q5F7U2_NEIG1]	2.19664	6.08	1	1	1	1	0.907375	1		2.37987	1		2.55777	1		2.05593e+08	148	16.3253	6.75635
Q5F7V6	Succinate-semialdehyde dehydrogenase OS=Neisseria gonorrhoeae (strain ATCC 700825 / FA 1090) GN=gabD PE=3 SV=1 - [Q5F7V6_NEIG1]	2.46969	1.26	1	1	1	1	0.810205	1		1.42084	1		1.25173	1		1.11212e+08	477	50.9784	5.74463
Q5F7Y6	Membrane protein OS=Neisseria gonorrhoeae (strain ATCC 700825 / FA 1090) GN=NGO_1025 PE=4 SV=2 - [Q5F7Y6_NEIG1]	2.19819	4.91	1	1	1	1	1.18754	1		1.40422	1		1.15468	1		19628159	163	18.0882	6.53662
Q5F7Y7	2-nitropropane dioxygenase OS=Neisseria gonorrhoeae (strain ATCC 700825 / FA 1090) GN=NGO_1024 PE=4 SV=1 - [Q5F7Y7_NEIG1]	0	3.32	1	1	1	3	0.648142	3	13.654	0.819351	3	8.70577	0.77738	3	21.6545	7.32442e+07	391	41.9279	7.75244
Q5F7Z7	Phage/conjugal plasmid C-4 type zinc finger protein, TraR family OS=Neisseria gonorrhoeae (strain ATCC 700825 / FA 1090) GN=NGO_1007 PE=4 SV=1 - [Q5F7Z7_NEIG1]	0	15.94	1	1	1	1	0.897019	1		0.89169	1		0.759137	1		1.69619e+06	69	7.71768	6.26514
Q5F806	DNA primase OS=Neisseria gonorrhoeae (strain ATCC 700825 / FA 1090) GN=dnaG PE=3 SV=1 - [Q5F806_NEIG1]	0	1.53	1	1	1	1	0.866254	1		1.80109	1		1.58011	1			590	65.7597	6.49365
Q5F820	Peptidylprolyl isomerase OS=Neisseria gonorrhoeae (strain ATCC 700825 / FA 1090) GN=NGO_0981 PE=4 SV=1 - [Q5F820_NEIG1]	2.06236	8.13	1	1	1	1	0.786357	1		1.55185	1		1.44909	1		1.65317e+07	160	17.3342	4.64014
Q5F833	Amino acid ABC transporter permease OS=Neisseria gonorrhoeae (strain ATCC 700825 / FA 1090) GN=NGO_0968 PE=3 SV=1 - [Q5F833_NEIG1]	2.78243	3.63	1	1	1	1	0.998015	1		1.78692	1		1.2459	1		2.63672e+07	248	27.7209	9.29053
Q5F858	Homoserine O-acetyltransferase OS=Neisseria gonorrhoeae (strain ATCC 700825 / FA 1090) GN=metX PE=3 SV=1 - [METX_NEIG1]	1.77325	1.85	1	1	1	1	0.966727	1		3.28268	1		2.4569	1		328029883	379	42.1179	6.20166
Q5F862	Methylenetetrahydrofolate reductase OS=Neisseria gonorrhoeae (strain ATCC 700825 / FA 1090) GN=NGO_0929 PE=3 SV=1 - [Q5F862_NEIG1]	2.22661	4.45	1	1	1	1	1.17426	1		0.645941	1		0.644316	1		7.17163e+06	292	33.0771	7.02002
Q5F868	Succinate dehydrogenase OS=Neisseria gonorrhoeae (strain ATCC 700825 / FA 1090) GN=NGO_0923 PE=4 SV=1 - [Q5F868_NEIG1]	3.17453	9.6	1	1	1	1	1.04324	1		0.967623	1		0.884437	1		1.42797e+06	125	13.8248	9.99365
Q5F876	Dihydrolipoyl dehydrogenase OS=Neisseria gonorrhoeae (strain ATCC 700825 / FA 1090) GN=NGO_0915 PE=4 SV=1 - [Q5F876_NEIG1]	0	5.03	1	1	1	1	1.14658	1		3.77456	1		3.76982	1		1.99488e+07	477	50.0482	6.30322
Q5F885	Oxidoreductase OS=Neisseria gonorrhoeae (strain ATCC 700825 / FA 1090) GN=NGO_0904 PE=4 SV=1 - [Q5F885_NEIG1]	0	4.63	1	1	1	1	0.727318	1		2.61378	1		2.53809	1		4.8608e+07	259	28.3207	5.73193
Q5F895	FAD-linked oxidase OS=Neisseria gonorrhoeae (strain ATCC 700825 / FA 1090) GN=NGO_0893 PE=4 SV=1 - [Q5F895_NEIG1]	0	1.1	1	1	1	2	0.964844	1		1.06209	1		0.824379	1			1277	141.751	8.08936
Q5F897	Uncharacterized protein OS=Neisseria gonorrhoeae (strain ATCC 700825 / FA 1090) GN=NGO_0891 PE=4 SV=1 - [Q5F897_NEIG1]	2.48328	5.76	1	1	1	1	1.53198	1		1.9342	1		2.66428	1		1.04929e+07	139	14.6543	8.67529
Q5F8A1	Alkyl hydroperoxide reductase AhpD OS=Neisseria gonorrhoeae (strain ATCC 700825 / FA 1090) GN=NGO_0887 PE=3 SV=1 - [Q5F8A1_NEIG1]	2.005	3.3	1	1	1	1	0.800444	1		2.10273	1		1.86277	1		1.23061e+08	182	19.139	7.85498
Q5F8B2	Restriction endonuclease NgoMIV OS=Neisseria gonorrhoeae (strain ATCC 700825 / FA 1090) GN=NGO_0874 PE=4 SV=1 - [Q5F8B2_NEIG1]	2.63264	4.9	1	1	1	1	0.733425	1		0.853799	1		0.760939	1		5.60937e+06	286	31.7734	6.23975
Q5F8B3	Cytosine-specific methyltransferase OS=Neisseria gonorrhoeae (strain ATCC 700825 / FA 1090) GN=NGO_0873 PE=3 SV=1 - [Q5F8B3_NEIG1]	2.71695	5.13	1	1	1	1	0.729979	1		1.17537	1		1.04842	1		6.39886e+06	312	34.6657	7.40088
Q5F8B9	Transcriptional regulator OS=Neisseria gonorrhoeae (strain ATCC 700825 / FA 1090) GN=NGO_0867 PE=4 SV=1 - [Q5F8B9_NEIG1]	3.98329	8.53	1	1	1	2	1.14302	2	28.0044	1.66914	2	32.3342	1.29183	2	19.1121	2.63548e+07	129	15.0469	5.38916
Q5F8C7	Glycerol-3-phosphate acyltransferase OS=Neisseria gonorrhoeae (strain ATCC 700825 / FA 1090) GN=plsY PE=3 SV=1 - [PLSY_NEIG1]	2.90876	4.5	1	1	1	1	1.10998	1		1.49314	1		0.832689	1		4.83144e+06	200	20.7385	10.0522
Q5F8C8	7,8-dihydroneopterin aldolase OS=Neisseria gonorrhoeae (strain ATCC 700825 / FA 1090) GN=NGO_0857 PE=3 SV=1 - [Q5F8C8_NEIG1]	3.8754	9.32	1	1	1	1	0.841969	1		3.79184	1		4.05327	1		2.73475e+07	118	13.354	4.94482
Q5F8D3	Gamma-glutamyl phosphate reductase OS=Neisseria gonorrhoeae (strain ATCC 700825 / FA 1090) GN=proA PE=3 SV=1 - [PROA_NEIG1]	0	2.62	1	1	1	1	0.897198	1		1.91703	1		1.26908	1		1.88345e+06	420	44.8914	5.92236
Q5F8D4	2-isopropylmalate synthase OS=Neisseria gonorrhoeae (strain ATCC 700825 / FA 1090) GN=leuA PE=3 SV=1 - [LEU1_NEIG1]	2.01281	1.35	1	1	1	1	0.758399	1		2.71377	1		2.3975	1		8.25204e+06	517	55.3016	6.34131
Q5F8E7	Phytoene synthase OS=Neisseria gonorrhoeae (strain ATCC 700825 / FA 1090) GN=NGO_0830 PE=4 SV=1 - [Q5F8E7_NEIG1]	5.13729	7.24	1	1	1	1	1.72126	1		2.03364	1		2.51848	1		1.83853e+07	290	32.8299	8.19189
Q5F8H5	Bifunctional uridylyltransferase/uridylyl-removing enzyme OS=Neisseria gonorrhoeae (strain ATCC 700825 / FA 1090) GN=glnD PE=3 SV=1 - [GLND_NEIG1]	0	1.41	1	1	1	1	0.721497	1		2.43877	1		2.22927	1		1.44879e+07	852	96.903	7.7085
Q5F8H6	XRE family transcriptional regulator OS=Neisseria gonorrhoeae (strain ATCC 700825 / FA 1090) GN=NGO_0797 PE=4 SV=1 - [Q5F8H6_NEIG1]	0	10.48	1	1	1	1	1.48629	1		1.38019	1		2.28686	1		1.48459e+07	105	11.8091	8.1626
Q5F8I1	Octanoyltransferase OS=Neisseria gonorrhoeae (strain ATCC 700825 / FA 1090) GN=lipB PE=3 SV=2 - [LIPB_NEIG1]	2.16819	6.28	1	1	1	1	1.06751	1		2.29584	1		2.38565	1		1.71811e+07	207	22.7837	6.03662
Q5F8I2	UPF0250 protein NGO0791 OS=Neisseria gonorrhoeae (strain ATCC 700825 / FA 1090) GN=NGO0791 PE=3 SV=1 - [Y791_NEIG1]	3.35009	12.09	1	1	1	1	0.723899	1		1.46037	1		1.42269	1		10073267	91	10.2362	6.354
Q5F8J2	ABC transporter OS=Neisseria gonorrhoeae (strain ATCC 700825 / FA 1090) GN=NGO_0781 PE=4 SV=1 - [Q5F8J2_NEIG1]	2.96703	2.34	1	1	1	2	0.717363	2	29.6371	1.00231	2	0.399223	0.778369	2	3.76087	2.47534e+06	640	71.7863	6.20166
Q5F8J5	Membrane protein OS=Neisseria gonorrhoeae (strain ATCC 700825 / FA 1090) GN=NGO_0778 PE=4 SV=1 - [Q5F8J5_NEIG1]	2.58212	5.56	1	1	1	1	0.87557	1		1.26519	1		0.84569	1		1.60193e+07	144	16.0683	8.32373
Q5F8K2	Lipoprotein-releasing system ATP-binding protein LolD OS=Neisseria gonorrhoeae (strain ATCC 700825 / FA 1090) GN=lolD PE=3 SV=1 - [LOLD_NEIG1]	0	7.36	1	1	1	1	0.773343	1		1.07105	1		0.78588	1		2.77696e+06	231	25.2432	8.06006
Q5F8M4	Methyltransferase OS=Neisseria gonorrhoeae (strain ATCC 700825 / FA 1090) GN=NGO_0746 PE=4 SV=1 - [Q5F8M4_NEIG1]	0	7.66	1	1	1	1	0.740745	1		1.26678	1		0.990338	1		544421	222	24.368	7.18115
Q5F8M8	Nucleoid-associated protein NGO0742 OS=Neisseria gonorrhoeae (strain ATCC 700825 / FA 1090) GN=NGO0742 PE=3 SV=1 - [Y742_NEIG1]	0	9.91	1	1	1	1	0.81297	1		1.17821	1		1.04251	1		3.6269e+06	111	11.975	5.09717
Q5F8N0	3-dehydroquinate dehydratase OS=Neisseria gonorrhoeae (strain ATCC 700825 / FA 1090) GN=aroD PE=3 SV=1 - [AROD_NEIG1]	2.93912	7.48	1	1	1	1	0.756658	1		1.55799	1		1.36488	1		7.92202e+06	254	27.2619	5.46533
Q5F8P1	Baseplate protein OS=Neisseria gonorrhoeae (strain ATCC 700825 / FA 1090) GN=NGO_0727 PE=4 SV=1 - [Q5F8P1_NEIG1]	0	11.54	1	1	1	1	1.516	1		1.06407	1		1.30636	1		600377	182	19.8592	6.93213
Q5F8Q0	Glucokinase OS=Neisseria gonorrhoeae (strain ATCC 700825 / FA 1090) GN=glk PE=3 SV=1 - [GLK_NEIG1]	0	4.88	1	1	1	1	0.996325	1		3.20182	1		3.38582	1		2.1881e+07	328	35.09	7.45947
Q5F8Q4	2-dehydro-3-deoxyphosphogluconate aldolase OS=Neisseria gonorrhoeae (strain ATCC 700825 / FA 1090) GN=NGO_0713 PE=4 SV=1 - [Q5F8Q4_NEIG1]	2.50122	3.77	1	1	1	1	0.935511	1		3.42407	1		3.01092	1		22849522	212	21.9909	6.02393
Q5F8R7	Recombination factor protein RarA OS=Neisseria gonorrhoeae (strain ATCC 700825 / FA 1090) GN=NGO_0696 PE=4 SV=1 - [Q5F8R7_NEIG1]	3.4578	3.21	1	1	1	1	0.97943	1		1.62267	1		1.20852	1		5657017	436	48.3483	6.48096
Q5F8S7	Serine protease OS=Neisseria gonorrhoeae (strain ATCC 700825 / FA 1090) GN=NGO_0683 PE=4 SV=1 - [Q5F8S7_NEIG1]	5.33978	4.23	1	1	1	1	1.24883	1		1.21877	1		1.32492	1		21600125	426	47.8711	8.52881
Q5F8T0	Glutamate--cysteine ligase OS=Neisseria gonorrhoeae (strain ATCC 700825 / FA 1090) GN=NGO_0680 PE=4 SV=2 - [Q5F8T0_NEIG1]	3.08617	1.78	1	1	1	1	0.862613	1		2.10129	1		1.68624	1		1.57036e+07	449	49.628	5.24951
Q5F8T5	Restriction endonuclease NlaIV OS=Neisseria gonorrhoeae (strain ATCC 700825 / FA 1090) GN=NGO_0675 PE=4 SV=1 - [Q5F8T5_NEIG1]	2.50172	2.47	1	1	1	1	0.893703	1		2.13706	1		1.97684	1			243	28.7959	8.89502
Q5F8U0	RNA methyltransferase OS=Neisseria gonorrhoeae (strain ATCC 700825 / FA 1090) GN=NGO_0670 PE=1 SV=1 - [Q5F8U0_NEIG1]	3.74675	4.43	1	1	1	1	0.910555	1		1.7403	1		1.62467	1		1.10498e+07	271	30.0802	6.11279
Q5F8U4	YSIRK family Signal peptide OS=Neisseria gonorrhoeae (strain ATCC 700825 / FA 1090) GN=NGO_0666 PE=4 SV=1 - [Q5F8U4_NEIG1]	0	4.93	1	1	1	1	1.37726	1		1.3647	1		1.67554	1		24621176	142	15.8111	9.11475
Q5F8U5	Aldehyde dehydrogenase OS=Neisseria gonorrhoeae (strain ATCC 700825 / FA 1090) GN=NGO_0665 PE=4 SV=1 - [Q5F8U5_NEIG1]	3.92045	2.46	1	1	1	1	0.774602	1		1.07859	1		0.88946	1		1.44902e+07	447	49.346	6.7417
Q5F8U7	Aspartyl/glutamyl-tRNA(Asn/Gln) amidotransferase subunit C OS=Neisseria gonorrhoeae (strain ATCC 700825 / FA 1090) GN=gatC PE=3 SV=1 - [GATC_NEIG1]	4.46742	12.5	1	1	1	1	0.965119	1		2.7081	1		3.3884	1		52120599	96	11.0256	4.58936
Q5F8V2	Pyridoxine/pyridoxamine 5'-phosphate oxidase OS=Neisseria gonorrhoeae (strain ATCC 700825 / FA 1090) GN=pdxH PE=3 SV=1 - [PDXH_NEIG1]	2.76139	6.67	1	1	1	1	0.890117	1		1.21721	1		1.17054	1		8.52298e+06	210	24.1624	7.13721
Q5F8V3	Pseudouridine synthase OS=Neisseria gonorrhoeae (strain ATCC 700825 / FA 1090) GN=NGO_0657 PE=3 SV=2 - [Q5F8V3_NEIG1]	0	4.58	1	1	1	1	0.925838	1		1.74109	1		1.10442	1		9.93501e+06	349	39.4521	10.2134
Q5F8W9	Restriction endonuclease subunit M OS=Neisseria gonorrhoeae (strain ATCC 700825 / FA 1090) GN=NGO_0641 PE=4 SV=1 - [Q5F8W9_NEIG1]	2.20552	1.59	1	1	1	1	1.04673	1		0.998691	1		1.33662	1		1.15491e+07	756	85.9839	5.80811
Q5F8X0	Type III restriction-modification system HindVIP enzyme res OS=Neisseria gonorrhoeae (strain ATCC 700825 / FA 1090) GN=NGO_0640 PE=4 SV=1 - [Q5F8X0_NEIG1]	0	1.3	1	1	1	2	0.761699	2	19.7508	0.852719	2	8.5749	2.09881	2	1.76793	2.05292e+06	924	107.351	6.37939
Q5F909	ATPase OS=Neisseria gonorrhoeae (strain ATCC 700825 / FA 1090) GN=NGO_0598 PE=4 SV=1 - [Q5F909_NEIG1]	3.88445	4.96	1	1	1	1	1.0539	1		1.68921	1		1.23884	1			383	43.7413	7.32764
Q5F913	4-hydroxy-3-methylbut-2-en-1-yl diphosphate synthase (flavodoxin) OS=Neisseria gonorrhoeae (strain ATCC 700825 / FA 1090) GN=ispG PE=3 SV=1 - [ISPG_NEIG1]	0	4.99	1	1	1	1	1.00251	1		0.845374	1		1.3059	1		2.90643e+06	421	45.3396	7.35693
Q5F929	tRNA (guanine-N(7)-)-methyltransferase OS=Neisseria gonorrhoeae (strain ATCC 700825 / FA 1090) GN=trmB PE=3 SV=1 - [TRMB_NEIG1]	3.03728	4.62	1	1	1	1	0.685322	1		1.22734	1		1.00795	1		2.7068e+07	238	26.9448	6.93213
Q5F948	Uncharacterized protein OS=Neisseria gonorrhoeae (strain ATCC 700825 / FA 1090) GN=NGO_0555 PE=4 SV=1 - [Q5F948_NEIG1]	0	4.02	1	1	1	1	1.37667	1		1.55102	1		1.35231	1		4.00869e+06	497	56.5822	8.99756
Q5F957	Restriction endonuclease EcoPI subunit R OS=Neisseria gonorrhoeae (strain ATCC 700825 / FA 1090) GN=NGO_0546 PE=4 SV=1 - [Q5F957_NEIG1]	3.26821	1.23	1	1	1	1	1.00106	1		1.07898	1		1.06222	1		9787039	979	111.357	6.82959
Q5F959	Peptidyl-prolyl cis-trans isomerase OS=Neisseria gonorrhoeae (strain ATCC 700825 / FA 1090) GN=NGO_0544 PE=3 SV=1 - [Q5F959_NEIG1]	2.78061	5.95	1	1	1	1	0.710409	1		0.991064	1		0.89306	1		4.5098e+06	185	20.0305	9.86182
Q5F963	Conjugal transfer protein OS=Neisseria gonorrhoeae (strain ATCC 700825 / FA 1090) GN=NGO_0539 PE=4 SV=1 - [Q5F963_NEIG1]	4.14797	3.29	1	1	1	1	1.13671	1		2.07961	1		2.05727	1		11012952	365	40.3045	6.68311
Q5F983	Growth inhibitor PemK OS=Neisseria gonorrhoeae (strain ATCC 700825 / FA 1090) GN=NGO_0516 PE=4 SV=1 - [Q5F983_NEIG1]	2.65778	14.78	1	1	1	1	0.925974	1		2.00189	1		1.95383	1		1.53245e+07	115	12.4293	8.93896
Q5F989	Uncharacterized protein OS=Neisseria gonorrhoeae (strain ATCC 700825 / FA 1090) GN=NGO_0510 PE=4 SV=1 - [Q5F989_NEIG1]	0	1.45	1	1	1	2											1381	150.556	6.06201
Q5F990	Uncharacterized protein OS=Neisseria gonorrhoeae (strain ATCC 700825 / FA 1090) GN=NGO_0509 PE=4 SV=1 - [Q5F990_NEIG1]	0	8.6	1	1	1	2	0.643422	2	19.6979	0.656015	2	37.2447	0.546146	2	43.2331		93	10.1792	7.92822
Q5F9E5	Pilus assembly protein PilV OS=Neisseria gonorrhoeae (strain ATCC 700825 / FA 1090) GN=NGO_0453 PE=4 SV=1 - [Q5F9E5_NEIG1]	0	15.76	1	1	1	2	2.18799	1		1.04731	1		1.31617	1		3.69883e+06	203	22.0631	5.021
Q5F9E7	Replicative DNA helicase OS=Neisseria gonorrhoeae (strain ATCC 700825 / FA 1090) GN=NGO_0451 PE=3 SV=1 - [Q5F9E7_NEIG1]	3.51335	2.99	1	1	1	1	0.807399	1		1.84882	1		1.65823	1		5.48029e+06	468	52.1527	5.22412
Q5F9E8	Membrane protein OS=Neisseria gonorrhoeae (strain ATCC 700825 / FA 1090) GN=NGO_0449 PE=4 SV=1 - [Q5F9E8_NEIG1]	2.97053	6.51	1	1	1	1	0.980998	1		1.5966	1		1.33878	1		1.29949e+07	169	19.3948	9.67139
Q5F9F6	4-diphosphocytidyl-2-C-methyl-D-erythritol kinase OS=Neisseria gonorrhoeae (strain ATCC 700825 / FA 1090) GN=ispE PE=3 SV=1 - [ISPE_NEIG1]	3.88214	6.76	1	1	1	1	1.14299	1		1.20358	1		1.51776	1		5.80991e+06	281	30.969	8.47021
Q5F9I6	Clp protease ClpX OS=Neisseria gonorrhoeae (strain ATCC 700825 / FA 1090) GN=clpA PE=3 SV=1 - [Q5F9I6_NEIG1]	5.47876	1.44	1	1	1	2	0.922655	2	1.95693	1.45706	2	12.0686	1.04837	2	8.60466	7.80641e+06	763	84.2213	6.56592
Q5F9I8	Damage-inducible protein D OS=Neisseria gonorrhoeae (strain ATCC 700825 / FA 1090) GN=dinD PE=4 SV=1 - [Q5F9I8_NEIG1]	0	6.71	1	1	1	1	1.5918	1		1.96457	1		1.21177	1		4.6126e+08	283	32.2434	9.1001
Q5F9J6	ATP phosphoribosyltransferase regulatory subunit OS=Neisseria gonorrhoeae (strain ATCC 700825 / FA 1090) GN=hisZ PE=3 SV=1 - [HISZ_NEIG1]	2.63916	2.09	1	1	1	1	0.933729	1		2.67661	1		2.7173	1		1.41321e+07	383	41.7636	5.68115
Q5F9K0	TetR family transcriptional regulator OS=Neisseria gonorrhoeae (strain ATCC 700825 / FA 1090) GN=NGO_0393 PE=4 SV=1 - [Q5F9K0_NEIG1]	0	5.56	1	1	1	1	0.695	1		1.49206	1		0.817605	1		1.66755e+06	216	24.7367	7.06396
Q5F9N2	Heme biosynthesis protein HemY OS=Neisseria gonorrhoeae (strain ATCC 700825 / FA 1090) GN=NGO_0361 PE=4 SV=1 - [Q5F9N2_NEIG1]	0	3.21	1	1	1	1	1.12731	1		1.34802	1		0.974958	1		792684	405	45.1712	9.67139
Q5F9P2	Glutaredoxin OS=Neisseria gonorrhoeae (strain ATCC 700825 / FA 1090) GN=NGO_0351 PE=3 SV=1 - [Q5F9P2_NEIG1]	0	5.83	1	1	1	1	0.928598	1		1.51641	1		1.52081	1		1.1228e+08	103	11.4867	4.91943
Q5F9P6	DNA polymerase III subunit delta OS=Neisseria gonorrhoeae (strain ATCC 700825 / FA 1090) GN=NGO_0347 PE=4 SV=1 - [Q5F9P6_NEIG1]	0	6.15	1	1	1	2	1.20665	1		2.93858	1		1.98985	1		814436	325	36.9884	8.32373
Q5F9P8	5'-methylthioadenosine/S-adenosylhomocysteine nucleosidase OS=Neisseria gonorrhoeae (strain ATCC 700825 / FA 1090) GN=mtnN PE=3 SV=1 - [Q5F9P8_NEIG1]	3.74908	3.86	1	1	1	1	0.992836	1		2.97495	1		3.03409	1		5.74145e+07	233	24.7908	5.33838
Q5F9Q8	Phosphoribosylaminoimidazole-succinocarboxamide synthase OS=Neisseria gonorrhoeae (strain ATCC 700825 / FA 1090) GN=purC PE=3 SV=2 - [Q5F9Q8_NEIG1]	3.27078	3.14	1	1	1	1	0.912936	1		1.21376	1		1.13803	1		6763750	287	32.2315	5.22412
Q5F9Q9	dTDP-4-dehydrorhamnose reductase OS=Neisseria gonorrhoeae (strain ATCC 700825 / FA 1090) GN=NGO_0332 PE=4 SV=1 - [Q5F9Q9_NEIG1]	0	3.14	1	1	1	1	0.493232	1		1.1144	1		0.911516	1		1.11157e+07	287	31.2408	6.22705
Q5F9S6	HPr kinase/phosphorylase OS=Neisseria gonorrhoeae (strain ATCC 700825 / FA 1090) GN=hprK PE=3 SV=1 - [HPRK_NEIG1]	3.10118	4.38	1	1	1	1	0.876269	1		1.17462	1		1.27005	1		4.52666e+06	320	35.8349	5.8208
Q5F9T9	Restriction endonuclease HpaII OS=Neisseria gonorrhoeae (strain ATCC 700825 / FA 1090) GN=NGO_0300 PE=4 SV=1 - [Q5F9T9_NEIG1]	0	13.14	1	1	1	2	1.74133	1		4.42162	1		5.90077	1			137	15.9914	9.84717
Q5F9V9	Pseudouridine synthase OS=Neisseria gonorrhoeae (strain ATCC 700825 / FA 1090) GN=NGO_0278 PE=3 SV=1 - [Q5F9V9_NEIG1]	3.32841	4.28	1	1	1	1	1.05018	1		1.45042	1		1.49968	1		5.55233e+06	374	41.2698	5.33838
Q5F9Y7	Transposase OS=Neisseria gonorrhoeae (strain ATCC 700825 / FA 1090) GN=NGO_0247 PE=4 SV=2 - [Q5F9Y7_NEIG1]	0	41.54	1	1	1	1										100178	65	7.28864	5.32568
Q5F9Y9	3-deoxy-manno-octulosonate cytidylyltransferase OS=Neisseria gonorrhoeae (strain ATCC 700825 / FA 1090) GN=kdsB PE=3 SV=1 - [KDSB_NEIG1]	0	5.53	1	1	1	1	1.00133	1		2.13124	1		0.78967	1		5.40616e+06	253	27.7054	6.11279
Q5F9Z5	Thymidylate kinase OS=Neisseria gonorrhoeae (strain ATCC 700825 / FA 1090) GN=tmk PE=3 SV=1 - [KTHY_NEIG1]	0	7.28	1	1	1	1	1.03166	1		1.80648	1		1.64206	1		6.86405e+06	206	22.9427	5.22412
Q5FA27	Sugar transferase OS=Neisseria gonorrhoeae (strain ATCC 700825 / FA 1090) GN=NGO_0207 PE=4 SV=1 - [Q5FA27_NEIG1]	2.45791	2.45	1	1	1	1	1.33224	1		1.65603	1		0.921668	1		3.75584e+06	327	37.8875	8.1333
Q5FA37	Oxidoreductase OS=Neisseria gonorrhoeae (strain ATCC 700825 / FA 1090) GN=NGO_0197 PE=4 SV=2 - [Q5FA37_NEIG1]	0	5.57	1	1	1	1											431	48.3962	6.41748
Q5FA48	HIT family hydrolase OS=Neisseria gonorrhoeae (strain ATCC 700825 / FA 1090) GN=NGO_0184 PE=4 SV=1 - [Q5FA48_NEIG1]	2.58923	14.02	1	1	1	1	0.849714	1		1.58021	1		1.66491	1		2.05116e+06	107	11.604	6.87354
Q5FA61	ABC transporter ATP-binding protein OS=Neisseria gonorrhoeae (strain ATCC 700825 / FA 1090) GN=NGO_0170 PE=4 SV=1 - [Q5FA61_NEIG1]	3.68362	4.38	1	1	1	1	0.886791	1		0.851182	1		0.539768	1		14573658	251	28.1103	7.53271
Q5FA73	3'-5' exonuclease OS=Neisseria gonorrhoeae (strain ATCC 700825 / FA 1090) GN=NGO_0156 PE=4 SV=1 - [Q5FA73_NEIG1]	0	7.95	1	1	1	1	0.834009	1		1.42241	1		1.26152	1		5.56752e+06	264	30.4808	5.63037
Q5FA84	Endoribonuclease YbeY OS=Neisseria gonorrhoeae (strain ATCC 700825 / FA 1090) GN=ybeY PE=3 SV=2 - [YBEY_NEIG1]	2.59966	5.26	1	1	1	1	0.945878	1		1.2564	1		1.38255	1		7554832	171	19.8169	5.99854
Q5FA85	Cation transporter OS=Neisseria gonorrhoeae (strain ATCC 700825 / FA 1090) GN=NGO_0144 PE=4 SV=1 - [Q5FA85_NEIG1]	3.29725	4.74	1	1	1	1	0.914593	1		1.72697	1		1.45811	1		9.09983e+06	274	31.0429	4.88135
Q5FA97	6-carboxy-5,6,7,8-tetrahydropterin synthase OS=Neisseria gonorrhoeae (strain ATCC 700825 / FA 1090) GN=NGO_0131 PE=4 SV=1 - [Q5FA97_NEIG1]	0	10	1	1	1	1	1.36868	1		1.60454	1		1.45535	1		797536	140	15.7387	6.85889
Q5FAB4	Ribonuclease G OS=Neisseria gonorrhoeae (strain ATCC 700825 / FA 1090) GN=NGO_0113 PE=4 SV=1 - [Q5FAB4_NEIG1]	0	2.41	1	1	1	1	1.18561	1		1.27885	1		0.941404	1		6.26308e+06	497	56.5574	5.51611
Q5FAC4	Cytochrome C biogenesis protein OS=Neisseria gonorrhoeae (strain ATCC 700825 / FA 1090) GN=NGO_0102 PE=4 SV=2 - [Q5FAC4_NEIG1]	0	2.15	1	1	1	1	1.57528	1		1.64948	1		1.04126	1		8.80137e+07	650	73.7812	8.79248
Q5FAG4	Homoprotocatechuate degradative operon repressor OS=Neisseria gonorrhoeae (strain ATCC 700825 / FA 1090) GN=NGO_0058 PE=4 SV=2 - [Q5FAG4_NEIG1]	2.41893	15.07	1	1	1	1	0.931889	1		1.5056	1		1.06574	1		6.95368e+06	146	16.6049	5.22412
Q5FAI6	Glycoprotease OS=Neisseria gonorrhoeae (strain ATCC 700825 / FA 1090) GN=NGO_0032 PE=4 SV=1 - [Q5FAI6_NEIG1]	2.39986	4	1	1	1	1	0.660708	1		1.00624	1		0.890749	1		5.00976e+06	225	23.8615	6.03662
Q5FAJ2	Chromosomal replication initiator protein DnaA OS=Neisseria gonorrhoeae (strain ATCC 700825 / FA 1090) GN=dnaA PE=3 SV=1 - [DNAA_NEIG1]	3.24956	3.09	1	1	1	1	0.906588	1		1.6558	1		1.15365	1		7.16567e+06	518	58.021	6.50732
Q5FAJ5	Protein-L-isoaspartate O-methyltransferase OS=Neisseria gonorrhoeae (strain ATCC 700825 / FA 1090) GN=NGO_0019 PE=4 SV=1 - [Q5FAJ5_NEIG1]	3.27856	4.59	1	1	1	1	1.17273	1		2.19596	1		1.6629	1		14847990	218	24.0675	4.89404
Q5FAJ8	Preprotein translocase subunit SecG OS=Neisseria gonorrhoeae (strain ATCC 700825 / FA 1090) GN=NGO_0016 PE=4 SV=1 - [Q5FAJ8_NEIG1]	2.28322	19.83	1	1	1	1	0.719504	1		1.09298	1		0.585941	1		5.12153e+06	116	12.1852	9.37842
Q9ZHY3	P-protein OS=Neisseria gonorrhoeae (strain ATCC 700825 / FA 1090) GN=pheA PE=3 SV=2 - [PHEA_NEIG1]	3.01186	1.93	1	1	1	1	0.805886	1		2.12884	1		2.27884	1		5.92022e+06	362	39.3291	6.02393

## Sheet: >2 peptides
Accession	Description	Gene	Score	Coverage	# Proteins	# Unique Peptides	# Peptides	# PSMs	ΔmlaA/wt #1	ΔmlaA/wt #2	# AAs	MW [kDa]	calc. pI
Q5F518	ABC transporter	NGO_2121	40.1913	34.3	1	10	10	17	0.335912	0.175492	277	29.622	5.021
A0A0H4J5B4	Opacity protein opA54	NGO_00350	333.097	50.66	1	6	20	183	0.412204	0.855119	229	25.9973	9.89111
Q5F832	Thermonuclease	NGO_0969	8.27696	11.66	1	2	2	2	0.636261	0.654785	223	24.7035	9.33447
Q5F9Q2	Cysteine synthase	NGO_0340	250.352	76.45	1	23	23	120	0.636718	0.66592	310	32.7061	6.04932
Q5F5E9	Probable malate:quinone oxidoreductase	mqo	69.8678	32.99	1	14	14	20	0.647859	0.770042	488	54.1235	6.1001
Q5F5I6	Phosphoribosylamine--glycine ligase	purD	3.24777	12.29	1	2	2	2	0.648463	0.792351	423	45.1489	5.14795
Q5F5T1	30S ribosomal protein S19	rpsS	22.3193	45.65	1	6	6	11	0.659998	0.79752	92	10.3838	10.6968
Q5F5B6	Glutamine ABC transporter ATP-binding protein	NGO_2013	11.982	16.46	1	4	4	4	0.667609	0.747895	243	26.767	5.94775
Q5FA83	Porphobilinogen deaminase	hemC	6.07878	9	1	2	2	2	0.678239	0.85461	311	33.5926	6.06201
Q5FAA8	Peptide ABC transporter substrate-binding protein	NGO_0119	11.4091	40.21	1	4	4	4	0.688648	0.798531	97	10.5756	9.93506
Q5F906	Integration host factor subunit beta	ihfB	7.76157	27.88	1	3	3	3	0.690449	0.892984	104	11.7963	9.979
Q5F958	Type III restriction endonuclease subunit M	NGO_0545	10.5054	7.57	1	4	4	4	0.692458	0.652413	687	77.4349	5.2749
Q5F5N0	Sodium:glutamate symporter	NGO_1890	5.61327	5.45	1	2	2	2	0.702278	0.624667	404	42.9948	7.02002
Q5F8D8	Acetylglutamate kinase	argB	3.98103	10.07	1	2	2	2	0.704815	0.837306	298	31.3966	5.88428
Q5F8C0	Serine hydroxymethyltransferase	glyA	13.3444	9.86	1	4	4	5	0.710591	0.806909	416	44.9619	6.66846
Q5F697	Branched-chain amino acid aminotransferase	NGO_1665	5.42815	11.75	1	2	2	2	0.710934	0.699419	332	36.1066	5.99854
Q5F9J3	Adenylate kinase	adk	8.998	35.35	1	6	6	6	0.714461	0.838154	215	23.11	5.26221
Q5F9W4	Ribosomal RNA small subunit methyltransferase A	rsmA	5.50412	10.04	1	2	2	2	0.715423	0.677274	259	29.2175	7.1958
Q5F7X4	Exopolyphosphatase	NGO_1041	18.7446	16.14	1	8	8	11	0.719018	0.795061	502	55.7925	7.48877
Q5F711	Biopolymer transporter ExbB	NGO_1378	6.2418	11.82	1	2	2	2	0.719875	0.705042	220	24.1168	9.43701
Q5F6Q6	30S ribosomal protein S20	rpsT	26.0142	40.23	1	5	5	10	0.720394	0.747885	87	9.50235	11.561
Q5F5U2	50S ribosomal protein L6	rplF	29.4132	51.41	1	10	10	15	0.721264	0.797896	177	18.928	9.59814
Q5F506	30S ribosomal protein S21	rpsU	17.5555	41.43	1	3	3	7	0.72477	0.867545	70	8.34968	11.019
Q5F645	Indole-3-glycerol phosphate synthase	trpC	10.8023	16.92	1	4	4	5	0.727187	0.770746	260	28.6041	5.70654
Q5F5X8	Chromosome partitioning protein	NGO_1790	15.3283	23.35	1	4	4	4	0.727819	0.654318	257	27.0033	6.0874
Q5F9L9	Amino acid ABC transporter ATPase	NGO_0374	7.2112	11.95	1	2	2	2	0.727941	0.829999	251	27.9788	7.13721
Q5F9Y0	N utilization substance protein B homolog	nusB	19.3559	35.46	1	5	5	7	0.730448	0.772548	141	15.9874	8.1333
Q5F754	DNA topoisomerase 4 subunit B	parE	8.06315	6.2	1	2	2	4	0.731837	0.796325	661	72.0542	5.97314
Q5F6V2	Chromosome partition protein Smc	smc	3.32112	2.33	1	2	2	2	0.732405	0.827137	1161	130.281	5.65576
Q5F9X3	Amidophosphoribosyltransferase	purF	14.2807	9.92	1	3	3	3	0.735092	0.851293	514	55.9543	6.44287
Q5F5U4	30S ribosomal protein S5	rpsE	59.1931	68.02	1	13	13	26	0.736055	0.930357	172	18.2347	10.0376
Q5F9R5	RNA-binding protein Hfq	hfq	10.9182	74.23	1	4	4	8	0.73792	0.676748	97	10.7767	8.52881
Q5F668	Phospho-2-dehydro-3-deoxyheptonate aldolase	NGO_1695	17.6223	12.25	1	4	4	9	0.739387	0.764214	351	38.6307	6.771
Q5F5K6	UDP-N-acetylglucosamine 1-carboxyvinyltransferase	murA	20.6422	10.31	1	4	4	6	0.739393	0.873993	417	43.7917	5.93506
Q5F8E5	Short-chain dehydrogenase	NGO_0832	11.5694	27.62	1	5	5	6	0.742686	0.851341	239	25.9633	6.40479
Q5F9W5	GTP pyrophosphokinase	NGO_0271	1.8136	8.47	1	2	2	2	0.743663	0.828612	189	22.4465	8.92432
Q5F839	Universal stress protein	NGO_0959	7.72928	22.08	1	2	2	2	0.745218	0.66826	154	16.4114	5.89697
Q5F5F4	Elongation factor Ts	tsf	134.33	42.61	1	15	15	38	0.747339	0.920752	284	30.3397	5.18604
Q5F6P9	Glutamate racemase	murI	4.73738	14.07	1	2	2	2	0.749312	0.868943	270	29.4965	7.03467
Q5F923	30S ribosomal protein S18	rpsR	34.8861	52.63	1	6	6	20	0.749344	0.901121	76	8.98691	10.2866
Q5FAA9	N-acetyl-gamma-glutamyl-phosphate reductase	argC	6.16858	11.82	1	2	2	2	0.751521	0.832002	347	37.152	6.44287
Q5F947	Aspartate ammonia-lyase	aspA	9.06707	4.95	1	2	2	3	0.753472	0.882523	465	50.6603	5.5415
Q5F5I8	Electron transfer flavoprotein subunit beta	NGO_1936	42.9002	34.08	1	9	9	20	0.754189	0.749754	311	32.5723	5.14795
Q5F7F1	Probable cytosol aminopeptidase	pepA	7.84898	6.41	1	3	3	3	0.754362	0.674599	468	49.9972	5.17334
Q5FA22	1-(5-phosphoribosyl)-5-[(5-phosphoribosylamino)methylideneamino] imidazole-4-carboxamide isomerase	hisA	5.15184	5.71	1	2	2	2	0.754428	0.780527	245	25.8485	5.22412
Q5F9I3	Peptidase PmbA	pmbA	4.66017	5.19	1	3	3	4	0.756161	0.740528	443	47.7666	5.5542
Q5F5S5	30S ribosomal protein S10	rpsJ	29.7156	63.11	1	8	8	14	0.756341	0.850026	103	11.7995	9.56885
Q5F707	GTP pyrophosphokinase	NGO_1382	9.6166	5.29	1	3	3	4	0.758935	0.975499	737	82.3459	6.59521
Q5F7D6	Imidazoleglycerol-phosphate dehydratase	hisB	23.0174	23.43	1	6	6	9	0.75993	0.440222	303	33.5022	8.42627
Q5F5S1	30S ribosomal protein S12	rpsL	23.1054	27.64	1	5	5	10	0.761619	0.691212	123	13.7275	10.7554
Q5F973	Phosphoribosylformylglycinamidine cyclo-ligase	purM	16.2949	15.7	1	4	4	5	0.764071	0.688085	344	36.8749	5.0083
Q5F883	(Fe-S)-binding protein	NGO_0906	19.8714	19.83	1	6	6	12	0.765805	0.934172	484	53.8867	8.36768
Q5F5R1	50S ribosomal protein L11	rplK	61.4716	58.33	1	10	10	20	0.768442	0.956904	144	14.9801	9.70068
Q5F8W0	RNA helicase	NGO_0650	10.0005	8.44	1	3	3	3	0.768798	0.745018	462	51.1067	9.43701
Q5F5A5	50S ribosomal protein L13	rplM	31.5611	43.36	1	6	6	15	0.771196	0.831095	143	16.2276	9.72998
Q5F4X3	Phosphate acyltransferase	plsX	10.4203	9.48	1	3	3	5	0.772564	1.06232	348	36.7743	7.56201
Q5F9T6	Phenylalanine--tRNA ligase beta subunit	pheT	18.2054	7.37	2	6	6	8	0.77382	0.796721	787	85.9344	5.31299
Q5FAJ1	DNA polymerase III subunit beta	NGO_0002	9.1856	9.54	1	4	4	5	0.775371	1.02172	367	40.8434	5.22412
Q5F5L0	6-phosphogluconate dehydrogenase, decarboxylating	NGO_1914	24.3333	17.01	1	6	6	8	0.775932	0.713273	482	52.6775	5.41455
Q5F6Y0	Na(+)-translocating NADH-quinone reductase subunit A	nqrA	7.51472	7.83	1	3	3	3	0.776975	0.609553	447	48.7119	7.25439
Q5F6L0	UDP-N-acetylmuramoyl-L-alanyl-D-glutamate--2,6-diaminopimelate ligase	murE	8.87069	11.18	1	4	4	4	0.777531	0.763256	492	52.9767	6.59521
Q5F5V6	LysR family transcriptional regulator	NGO_1813	11.5569	15.36	1	3	3	3	0.779684	0.672769	306	34.082	6.53662
Q5F556	Probable nicotinate-nucleotide adenylyltransferase	nadD	4.39817	7.96	1	2	2	2	0.781441	0.823968	201	22.2234	8.22119
Q5F8K8	ABC transporter ATP-binding protein	NGO_0764	39.2295	27.86	1	15	15	17	0.78234	0.84316	542	60.7686	5.24951
Q5F5Q8	Elongation factor Tu	tuf1	318.859	58.88	1	23	23	135	0.783034	0.776943	394	42.9109	5.30029
Q5F8W4	Acetylornithine aminotransferase	argD	3.09277	8.31	1	2	2	2	0.784214	0.912113	397	42.6568	7.35693
Q5F5U1	30S ribosomal protein S8	rpsH	34.3797	53.08	1	6	6	13	0.784848	0.880575	130	14.1145	9.71533
Q5F9N1	Uroporphyrinogen decarboxylase	hemE	27.1364	10.73	1	4	4	9	0.785156	0.880695	354	38.9921	7.26904
Q5FAF7	Tyrosine--tRNA ligase	tyrS	24.7122	20.65	1	6	6	8	0.785479	0.974415	431	47.1523	6.39209
Q5F633	Putative ribosome biogenesis GTPase RsgA	rsgA	9.62624	15.31	1	4	4	4	0.786961	0.755285	307	33.4873	7.04932
Q5F6P2	Holo-[acyl-carrier-protein] synthase	acpS	5.87951	35.2	1	3	3	3	0.78753	0.890479	125	13.5001	8.11865
Q5F6F9	Glutamine synthetase	NGO_1600	67.1857	17.8	1	11	11	26	0.788092	0.710775	472	51.9717	5.40186
Q5F926	Thioredoxin reductase	NGO_0580	23.6554	16.77	1	5	5	10	0.790555	0.85085	316	33.633	5.31299
Q5F682	50S ribosomal protein L28	rpmB	25.5071	64.94	1	7	7	12	0.792493	0.816893	77	8.81275	11.7075
Q5FA55	Chemotaxis protein CheY	NGO_0177	8.14111	16.89	1	3	3	5	0.792643	0.927633	225	24.764	5.68115
Q5F7T8	Isocitrate dehydrogenase	NGO_1082	17.8585	14.04	1	8	8	11	0.794125	0.914503	741	79.8991	6.03662
Q5F685	50S ribosomal protein L27	rpmA	3.76326	38.89	1	3	3	3	0.794859	0.905946	90	9.69307	10.0522
Q5F5P7	Methionyl-tRNA formyltransferase	fmt	13.2439	13.64	1	3	3	5	0.796039	0.820846	308	32.8061	5.75732
Q5F5S7	50S ribosomal protein L3	rplC	62.3014	47.2	1	11	11	26	0.797428	0.943394	214	22.664	10.0376
Q5F9F4	50S ribosomal protein L25	rplY	105.359	59.47	1	13	13	39	0.797735	0.890609	190	20.9412	7.13721
Q5F7E3	Acetolactate synthase	NGO_1235	11.5954	24.54	1	4	4	5	0.798262	0.848089	163	18.2818	5.69385
Q5F9J5	Adenylosuccinate synthetase	purA	19.5716	22.12	1	8	8	10	0.800253	0.822732	434	45.9528	6.46826
Q5FAJ7	Triosephosphate isomerase	tpiA	7.53732	8.56	1	3	3	3	0.800331	0.871562	257	28.2755	5.8208
Q5F5S8	50S ribosomal protein L4	rplD	101.451	57.77	1	10	10	43	0.80047	0.890639	206	23.2885	9.99365
Q5FA35	Transcription termination factor Rho	rho	62.9396	33.41	1	14	14	22	0.80123	0.819405	419	47.2897	6.68311
Q5F5T8	50S ribosomal protein L24	rplX	19.1099	46.73	1	5	5	7	0.801869	1.00195	107	11.6006	10.5649
Q5FA60	50S ribosomal protein L19	rplS	45.708	61.16	1	8	8	17	0.802154	0.875211	121	13.7596	10.4478
Q5F5J8	Glutamate--tRNA ligase	gltX	8.47985	10.78	1	4	4	6	0.802166	0.703624	464	52.2959	5.90967
Q5F8Z5	Ribonucleotide-diphosphate reductase subunit beta	NGO_0615	9.28334	5.73	1	2	2	3	0.802477	1.03146	384	44.026	4.75439
Q5F9W7	Amino acid ABC transporter ATPase	NGO_0269	7.81477	11.98	1	4	4	4	0.802505	0.845455	242	27.0099	6.354
Q5F8V6	NH(3)-dependent NAD(+) synthetase	NGO_0654	8.33218	12.17	1	3	3	3	0.803417	0.780875	263	29.2119	6.65381
Q5F8W2	Membrane protein	NGO_0648	15.5776	22.83	1	3	3	10	0.803499	0.865743	184	20.2835	10.9019
Q5F7E5	Ketol-acid reductoisomerase (NADP(+))	ilvC	55.6939	48.07	1	16	16	26	0.804028	0.730776	337	36.3943	6.23975
A0A0H4IVH0	Bifunctional protein PutA	NGO_08225	36.2556	11.99	1	11	11	17	0.804228	0.621678	1201	129.553	6.41748
Q5F5T7	50S ribosomal protein L14	rplN	72.0166	65.57	1	12	12	26	0.804838	0.854339	122	13.3944	10.5796
Q5F5Z6	DNA gyrase subunit B	gyrB	51.0957	15.7	1	12	12	17	0.805649	0.844538	796	88.1542	5.61768
Q5F533	DNA polymerase I	NGO_2103	17.8359	11.94	1	9	9	10	0.805801	0.920311	930	102.071	5.49072
Q5F529	tRNA modification GTPase MnmE	mnmE	5.39354	5.13	1	2	2	2	0.807127	0.717883	448	47.4108	5.04639
Q5F5R4	50S ribosomal protein L7/L12	rplL	52.6887	63.41	1	8	8	20	0.807801	1.08749	123	12.5567	4.7417
Q5F842	Aspartokinase	NGO_0956	28.2886	24.2	1	10	10	15	0.809626	0.820069	405	43.3714	5.30029
Q5F898	D-lactate dehydrogenase	NGO_0890	5.72442	5.15	1	2	2	2	0.809724	0.697513	563	63.35	6.87354
Q5F5T9	50S ribosomal protein L5	rplE	121.214	62.01	1	14	14	46	0.810459	0.907112	179	20.3659	9.5249
Q5F761	Glycine dehydrogenase (decarboxylating)	gcvP	11.8715	2.53	1	2	2	3	0.810763	0.904318	950	104.014	5.88428
Q5F5U0	30S ribosomal protein S14	rpsN	45.0385	36.63	1	5	5	15	0.811462	0.909575	101	11.5105	11.7515
Q5F6L9	UDP-N-acetylmuramate--L-alanine ligase	murC	29.9212	19.44	1	9	9	10	0.811493	0.825473	468	50.1629	6.26514
Q5F5W0	Valine--tRNA ligase	valS	45.0549	16.61	1	16	16	19	0.811806	0.978088	945	106.266	5.68115
Q5F931	UvrABC system protein B	uvrB	17.8659	9.19	1	6	6	6	0.812278	1.01512	675	76.8603	5.36377
Q5F5P6	Peptide deformylase	def	11.0416	32.34	1	5	5	5	0.812721	0.742201	167	19.059	5.87158
Q5F7D5	3-hydroxyacid dehydrogenase	NGO_1243	10.8264	8.65	1	2	2	3	0.81304	0.708426	289	30.2306	5.68115
Q5F5T2	50S ribosomal protein L22	rplV	77.6954	60.55	1	10	11	43	0.813475	0.870946	109	11.9015	10.2866
Q5F7E2	Acetolactate synthase	NGO_1236	28.2743	20	1	11	11	15	0.813809	0.776	575	62.8161	6.13818
Q5F510	Stringent starvation protein A	NGO_2130	9.00827	25.87	1	4	4	5	0.814392	0.740229	201	23.1499	6.69775
Q5F5U9	30S ribosomal protein S13	rpsM	85.8541	28.33	1	8	8	24	0.815188	0.877648	120	13.3511	10.4038
Q5F9E0	Deoxyuridine 5'-triphosphate nucleotidohydrolase	dut	7.12642	14.67	1	2	2	2	0.815276	0.886093	150	16.0933	4.97021
Q5F4X5	3-oxoacyl-[acyl-carrier-protein] synthase 3	fabH	10.9878	11.56	1	4	4	4	0.815564	0.861027	320	33.9805	6.69775
Q5F6U3	Aminotransferase	NGO_1452	9.40456	7.07	1	2	2	3	0.816972	0.958676	396	44.0375	6.01123
Q5F513	50S ribosomal protein L31	rpmE	4.54458	18.31	1	2	2	4	0.817988	1.05718	71	8.15999	9.0415
Q5FAC6	Probable GTP-binding protein EngB	engB	10.4284	12.92	1	2	2	3	0.819282	1.04461	209	23.5854	9.5249
Q5F570	Signal recognition particle receptor FtsY	ftsY	69.3031	37.77	1	11	11	21	0.820153	1.00653	421	44.7316	5.22412
Q5F5S2	30S ribosomal protein S7	rpsG	81.6275	57.05	1	11	11	40	0.82074	0.870538	156	17.6335	10.3306
Q5F5P8	Ribosomal RNA small subunit methyltransferase B	NGO_1869	16.7979	13.37	1	5	5	6	0.821034	0.976532	419	46.2871	8.32373
Q5F5U6	50S ribosomal protein L15	rplO	25.7369	36.81	1	6	6	10	0.821453	0.708012	144	14.9453	11.063
Q5F4X9	GMP synthase [glutamine-hydrolyzing]	guaA	83.512	42.42	1	24	24	34	0.822102	0.942171	521	57.5895	5.90967
Q5F7E7	Aconitate hydratase B	NGO_1231	48.5742	23.23	1	17	17	20	0.822828	0.759132	861	92.6727	5.73193
Q5F8N5	Ferredoxin-NADP reductase	NGO_0734	3.05673	7.72	1	2	2	2	0.823644	0.873588	259	29.1969	6.88818
Q5F4Y2	Inositol monophosphatase	NGO_2161	9.5665	13.26	1	4	4	4	0.824375	0.817593	264	29.4169	7.02002
Q5F5T3	30S ribosomal protein S3	rpsC	92.3755	54.35	1	15	15	37	0.825317	0.775218	230	25.8098	10.4185
Q5F9U6	Ferrochelatase	hemH	4.59369	12.2	1	3	3	3	0.826402	0.623255	336	38.0364	6.53662
Q5F9F8	Pantothenate synthetase	panC	11.5386	21.22	1	4	4	4	0.82691	0.833773	278	30.9813	6.56592
Q5F5S9	50S ribosomal protein L23	rplW	16.3285	44.34	1	3	3	8	0.827819	0.760541	106	11.4562	9.53955
Q5F6U2	Lysine--tRNA ligase	lysS	36.8862	18.89	1	10	10	15	0.828326	0.880256	503	57.344	5.35107
Q5F9U2	50S ribosomal protein L35	rpmI	14.9911	36.92	1	4	4	6	0.828804	0.937406	65	7.35213	11.7661
Q5F5T4	50S ribosomal protein L16	rplP	76.9334	60.87	1	8	8	32	0.830019	0.953975	138	15.5095	10.8433
Q5F4Y6	Lacto-N-neotetraose biosynthesis glycosyl transferase	NGO_2156	16.612	17.2	1	2	4	9	0.831109	0.781684	279	31.7761	6.75635
Q5F5V0	30S ribosomal protein S11	rpsK	26.91	36.64	1	5	5	9	0.831451	0.818655	131	13.9105	11.2534
Q5F5R3	50S ribosomal protein L10	rplJ	55.9851	69.88	1	12	12	32	0.832276	1.00549	166	17.6114	8.32373
Q5F5V5	Cell division topological specificity factor	minE	16.3599	39.08	1	4	4	5	0.832376	0.868333	87	10.0344	6.75635
Q5F9P0	Uracil phosphoribosyltransferase	upp	36.1445	35.58	1	5	5	13	0.832771	0.81879	208	22.863	5.69385
Q5F8H0	GTP-binding protein	NGO_0803	96.4024	38.47	1	22	22	37	0.83361	0.895325	603	67.1405	5.18604
Q5F6X1	Protein GrpE	grpE	34.6943	46.35	1	8	8	18	0.833924	1.08597	192	21.3367	4.76709
Q5F731	Glutamate dehydrogenase	NGO_1358	52.4458	34.46	1	13	13	23	0.834244	0.797867	444	48.4425	6.04932
Q5F785	UPF0237 protein NGO_1298	NGO_1298	16.7983	46.67	1	7	7	7	0.835093	0.829853	90	10.4074	5.45264
Q5F4Y4	Lacto-N-neotetraose biosynthesis glycosyl transferase	NGO_2159	11.5326	15.36	1	2	4	9	0.835185	0.919983	280	32.4117	8.49951
Q5F609	DNA helicase	NGO_1757	12.466	9.66	1	5	5	5	0.835527	0.836255	735	82.0651	6.65381
Q5F8Y5	Oxidoreductase	NGO_0624	44.849	25.49	1	12	12	19	0.835894	0.969522	463	52.2521	6.69775
Q5FA25	Peptide chain release factor 3	prfC	28.4371	16.76	1	9	9	11	0.83592	0.920282	531	59.4686	5.61768
Q5F531	Adhesin	NGO_2105	287.208	40.87	1	54	55	122	0.836931	0.732558	1468	160.41	9.20264
A0A0H4IVK1	Site-determining protein	NGO_09675	39.9871	24.72	1	8	8	13	0.837038	0.823713	271	29.6085	6.13818
Q5F9Q4	Diaminopimelate epimerase	dapF	3.70479	7.42	1	2	2	2	0.837226	0.839356	283	30.4049	4.91943
Q5F8S3	Ferredoxin-NADP reductase	NGO_0687	33.2788	34.88	1	9	9	12	0.837843	0.792438	258	29.312	6.17627
Q5F9Y6	Tryptophan synthase alpha chain	trpA	10.6265	22.61	1	5	5	5	0.837886	0.840052	261	27.9747	5.18604
Q5F6P5	DNA methylase	NGO_1504	11.293	12.63	1	5	5	5	0.838162	0.817396	380	42.2677	9.31982
Q5F922	50S ribosomal protein L9	rplI	38.4068	60.67	1	10	10	17	0.838467	0.986148	150	15.6935	7.25439
Q5F863	5-methyltetrahydropteroyltriglutamate--homocysteine methyltransferase	metE	130.333	34.56	1	26	26	41	0.838986	0.917512	758	84.9599	5.57959
Q5F752	Serine--tRNA ligase	serS	37.099	32.48	1	12	12	15	0.840103	0.983631	431	47.7983	6.01123
Q5F5Z8	Oligopeptidase A	NGO_1770	26.146	10.03	1	7	7	10	0.840458	0.816362	678	75.8574	5.64307
Q5F8E8	Chaperone protein HscA homolog	hscA	48.0848	24.84	1	15	15	21	0.840817	0.860166	620	66.3803	5.41455
Q5FAB1	Protein-export protein SecB	secB	28.1125	36.73	1	4	4	13	0.840941	0.941223	147	16.3232	4.27197
Q5F6I5	ABC transporter ATP-binding protein	NGO_1573	2.934	6.45	1	3	3	3	0.842234	0.69162	558	61.9962	5.63037
Q5F910	Nucleoside diphosphate kinase	NGO_0597	5.55091	26.21	1	2	2	2	0.842477	0.983431	103	11.2776	4.80518
Q5F8R1	N-6 DNA methylase	NGO_0702	15.5018	16.89	1	8	8	8	0.843501	0.677071	533	59.9858	5.8335
Q5F7J4	Phosphoribosylformylglycinamidine synthase	purL	4.9788	1.52	1	2	2	2	0.844656	0.903474	1314	142.882	5.24951
Q5FAF5	Isoleucine--tRNA ligase	ileS	16.831	6.89	1	6	6	7	0.844885	1.02091	929	104.158	5.89697
Q5F836	Nicotinate phosphoribosyltransferase	pncB	8.12409	8.96	1	2	2	2	0.844902	0.99329	402	46.236	7.34229
Q5F5V2	DNA-directed RNA polymerase subunit alpha	rpoA	41.813	34.15	1	13	13	15	0.845085	0.736373	328	35.9788	5.09717
Q5F6H2	Uncharacterized protein	NGO_1586	5.60456	25.81	1	2	2	2	0.845753	1.02684	93	11.0412	4.94482
Q5F4W2	50S ribosomal protein L34	rpmH	10.3308	50	1	4	4	4	0.846124	0.90503	44	5.04799	12.6011
Q5F6K7	Ribosomal RNA small subunit methyltransferase H	rsmH	25.0213	26.73	1	6	6	9	0.848286	0.903786	318	34.8073	7.15186
Q5F9K7	Cystathionine gamma-synthase	NGO_0386	20.7188	14.29	1	4	4	7	0.848818	1.07577	385	42.2274	6.48096
Q5F7C4	Alanine--tRNA ligase	alaS	168.83	46.45	1	38	38	66	0.849936	0.875819	874	95.8673	5.61768
Q5FAH1	Uncharacterized protein	NGO_0049	14.8793	20.34	1	6	6	8	0.851282	0.851863	177	20.9736	5.40186
Q5F5A6	Cell division protein ZapA	NGO_2023	5.78982	20.79	1	2	2	2	0.851925	0.931439	101	10.9436	5.19873
Q5F9Z9	DNA ligase	ligA	25.4432	17.13	1	12	12	12	0.853983	0.896013	823	90.1483	5.8208
Q5FAI1	tRNA-2-methylthio-N(6)-dimethylallyladenosine synthase	miaB	15.1301	7.01	1	2	2	3	0.85411	1.1839	442	49.6203	5.36377
Q5F7U1	Malonic semialdehyde reductase	NGO_1079	2.93618	5.49	1	2	2	2	0.854714	0.871362	273	30.1051	5.08447
Q5F8I0	Lipoyl synthase	lipA	2.00925	6.42	1	2	2	2	0.855111	0.775962	327	37.0228	7.53271
Q5F7X0	Tryptophan--tRNA ligase	trpS	29.221	21.13	1	7	7	11	0.855304	0.854081	336	37.5551	5.89697
Q5F5M1	Chaperone protein DnaJ	dnaJ	46.6223	30.03	1	12	12	15	0.855312	0.895391	373	40.5763	8.14795
Q5F6E9	Transaldolase	tal	39.8963	30.48	1	10	10	14	0.856748	0.878791	351	37.4786	5.59229
Q5FAB8	Oxidoreductase	NGO_0108	8.69107	16.77	1	2	2	3	0.8571	0.828218	161	17.8499	4.83057
Q5F9D9	Succinyldiaminopimelate aminotransferase	NGO_0460	36.1479	25.06	1	8	8	13	0.857431	0.933778	395	44.1077	6.69775
Q5F5L5	Twitching motility protein PilT	NGO_1908	75.1532	51.01	1	18	18	40	0.858221	0.78442	347	37.9756	6.93213
Q5F8V0	Aspartyl/glutamyl-tRNA(Asn/Gln) amidotransferase subunit B	gatB	70.9804	46.01	1	17	17	26	0.858871	1.08747	476	51.6804	5.19873
Q5F797	Translation initiation factor IF-2	infB	116.257	25.87	1	26	26	43	0.85935	0.784258	943	100.956	8.98291
Q5F9W3	Tryptophan synthase beta chain	trpB	15.2483	16.75	1	5	5	7	0.860033	0.723869	400	43.4318	6.17627
Q5F798	Transcription termination/antitermination protein NusA	nusA	34.3289	24.6	1	11	11	14	0.860217	0.875695	500	55.7595	4.64014
Q5F7G4	tRNA-specific 2-thiouridylase MnmA	mnmA	6.97083	12.81	1	3	3	3	0.860653	0.848861	367	40.8396	5.63037
Q5F5A4	30S ribosomal protein S9	rpsI	38.638	46.92	1	4	4	13	0.860828	0.874498	130	14.3708	10.9458
Q5F7H1	UvrABC system protein A	uvrA	30.3719	10.54	1	10	10	11	0.86297	0.71046	949	105.411	7.10791
Q5F835	Arginine--tRNA ligase	argS	34.8891	20.98	1	10	10	13	0.863674	0.863706	572	62.5812	5.78271
Q5F7Y3	Transketolase	NGO_1028	68.5505	30.05	1	16	16	23	0.863832	1.06416	659	71.5299	5.93506
Q5F873	Citrate synthase	gltA	34.8935	18.5	1	9	9	11	0.864308	0.733212	427	48.0902	6.94678
Q5F585	Methionine--tRNA ligase	metG	34.9862	19.44	1	11	11	13	0.86433	1.1137	684	76.8951	5.70654
Q5F5F3	30S ribosomal protein S2	rpsB	112.655	73.97	1	19	19	57	0.865672	0.932895	242	26.9	9.02686
Q5F905	30S ribosomal protein S1	rpsA	321.278	51.69	1	33	33	121	0.866102	0.964737	561	61.1529	5.07178
Q5F7G1	Glutathione synthetase	gshB	34.7246	41.19	1	11	11	15	0.867299	0.989923	318	35.134	6.59521
Q5F7G6	CTP synthase	pyrG	43.0949	24.82	1	13	13	20	0.867471	0.800333	544	59.8037	6.23975
Q5F7Y0	Single-stranded DNA-binding protein	NGO_1031	21.2288	36.78	1	5	5	6	0.86807	1.19042	174	19.4366	6.04932
Q5F938	Proline--tRNA ligase	proS	80.1518	38.6	1	22	22	35	0.868083	1.29052	570	62.828	5.33838
Q5F890	Transcription elongation factor GreA	greA	5.8404	16.46	1	1	2	2	0.868493	0.843028	158	17.4621	4.79248
Q5FAH6	Acetyl-CoA carboxylase	NGO_0044	32.8774	26.93	1	10	10	15	0.869205	0.757944	453	49.6113	6.58057
Q5F544	Iron ABC transporter substrate-binding protein	NGO_2092	2.49624	6.81	1	2	2	2	0.870831	0.479162	323	34.3859	5.84619
Q5F5H5	Peptide chain release factor 2	prfB	2.03291	5.72	1	2	2	2	0.872675	0.983378	367	41.3365	4.77979
Q5F8X6	Iron-sulfur cluster assembly scaffold protein IscU	NGO_0633	8.90786	22.66	1	3	3	3	0.873001	1.14446	128	13.938	5.04639
Q5F687	Octaprenyl diphosphate synthase	NGO_1675	5.0712	9.57	1	2	2	2	0.873159	0.913185	324	35.392	4.83057
Q5F879	Succinate--CoA ligase [ADP-forming] subunit alpha	NGO_0912	23.501	23.65	1	6	6	9	0.873509	1.00779	296	30.5298	5.87158
Q5F9K3	NAD kinase	nadK	17.9156	15.2	1	4	4	5	0.873957	0.936885	296	32.8549	5.89697
Q5F5J3	Glyceraldehyde-3-phosphate dehydrogenase	NGO_1931	142.568	45.51	1	15	15	56	0.874572	0.954823	334	35.7384	5.73193
A0A0H4IRX3	23S rRNA (guanosine-2'-O-)-methyltransferase RlmB	rlmB	7.18033	7.6	1	2	2	2	0.874956	0.971864	250	27.3929	6.94678
Q5F4X7	Malonyl CoA-acyl carrier protein transacylase	NGO_2166	16.1664	12.99	1	4	4	5	0.876228	0.920347	308	32.0094	5.33838
Q5F5F5	Uridylate kinase	pyrH	16.786	27.2	1	6	6	6	0.876346	1.09859	239	25.6971	7.23975
Q5FAG0	Ribosome-binding ATPase YchF	ychF	25.5776	31.4	1	9	9	14	0.876492	0.989466	363	39.2753	4.98291
Q5F8B4	Anthranilate synthase component 1	trpE	11.99	10.39	1	3	3	5	0.87699	0.833784	491	54.7139	5.57959
Q5F884	Uncharacterized protein	NGO_0905	13.792	27.47	1	6	6	8	0.877459	0.878652	233	25.7781	5.45264
Q5FAC8	Pilus assembly protein PilM	NGO_0098	87.7099	44.74	1	14	14	36	0.877689	0.848651	371	41.2852	5.2749
Q5F5I9	EtfB protein	NGO_1935	30.9014	30.12	1	8	8	10	0.878913	0.880687	249	26.9707	6.34131
Q5F695	2,3,4,5-tetrahydropyridine-2,6-dicarboxylate N-succinyltransferase	dapD	20.1015	23.08	1	7	7	8	0.879088	0.930244	273	29.2872	5.5415
Q5F8Z6	Ribonucleoside-diphosphate reductase	NGO_0614	64.8591	27.27	1	21	21	30	0.880318	1.02862	759	85.1152	6.20166
Q5F8C3	Fructose-1,6-bisphosphatase class 1	fbp	19.019	15.43	1	4	4	7	0.881502	1.03379	324	35.4511	5.37646
Q5F603	3-oxoacyl-[acyl-carrier-protein] synthase 2	NGO_1763	6.9881	6.75	1	3	3	3	0.8817	0.926601	415	43.0148	5.59229
Q5F7A5	Nitric oxide reductase large subunit	NGO_1275	3.25512	4.13	1	2	2	2	0.882031	0.72751	751	84.3052	6.7124
Q5F9D8	UPF0246 protein NGO0461	NGO0461	5.11823	16.6	1	5	5	5	0.882556	0.858473	259	29.6111	6.94678
Q5F9U5	Queuine tRNA-ribosyltransferase	tgt	2.33437	9.7	1	3	3	3	0.883656	0.863783	371	41.9351	7.21045
Q5F9M0	Cysteine ABC transporter permease	NGO_0373	2.45757	9.66	1	2	2	3	0.884298	0.806929	238	26.3712	9.5249
Q5F8P9	Transcriptional regulator	NGO_0718	6.58984	16.31	1	4	4	4	0.885239	0.730796	282	30.3627	5.49072
Q5F5Y3	Ribonuclease E	rne	39.6187	21	1	13	13	18	0.885303	0.543739	919	101.604	6.69775
Q5F7G0	Glutamine--tRNA ligase	glnS	24.4844	20.46	1	10	10	11	0.886598	0.754886	562	64.5314	6.32861
Q5F6Q3	Transferrin-binding protein 2	NGO_1496	107.831	38.26	1	31	31	57	0.88696	0.779056	703	75.1987	6.12549
Q5F8Z0	2-dehydro-3-deoxyphosphooctonate aldolase	kdsA	22.7114	20	1	6	6	7	0.887429	1.02519	280	30.4969	6.43018
Q5F6H8	Coproporphyrinogen-III oxidase	NGO_1580	78.6345	37.21	1	15	15	30	0.887648	0.960203	473	54.2496	6.72705
Q5F9I9	Restriction endonuclease, M subunit	NGO_0404	11.4066	7.39	1	4	4	4	0.88849	0.97568	514	57.444	5.13525
Q5F8X4	Cysteine desulfurase IscS	iscS	64.154	36.88	1	15	15	26	0.888823	1.05652	404	44.55	6.06201
Q5F4Y7	Glycine--tRNA ligase beta subunit	glyS	154.503	46.29	1	30	30	53	0.88953	0.881417	687	74.4053	5.75732
Q5F5Y0	tRNA uridine 5-carboxymethylaminomethyl modification enzyme MnmG	mnmG	44.0765	25.16	1	15	15	19	0.889767	0.899031	628	69.5809	6.7417
Q5F598	Cytochrome C	NGO_2031	6.49582	16.85	1	3	3	3	0.890421	0.667748	267	30.4793	8.92432
Q5F871	Succinate dehydrogenase iron-sulfur subunit	sdhB	4.5542	8.51	1	2	2	2	0.891268	0.652007	235	27.1267	7.48877
Q5F5N5	Pyruvate kinase	NGO_1881	24.3744	16.33	1	7	7	10	0.893741	0.936361	490	52.4752	5.49072
Q5F9F9	3-methyl-2-oxobutanoate hydroxymethyltransferase	panB	8.19648	11.41	1	3	3	3	0.893799	1.01962	263	27.7059	6.52197
Q5F5S3	Elongation factor G	fusA	151.554	51.36	1	34	34	54	0.893954	0.921698	701	77.1241	5.17334
Q5F601	Catalase	NGO_1767	68.5509	32.74	1	16	16	25	0.893967	0.874927	504	57.2772	6.65381
Q5F9P7	Twitching motility protein PilT	NGO_0346	61.9216	46.81	1	14	14	34	0.89441	0.909306	376	42.1887	6.34131
Q5F605	Dihydroorotate dehydrogenase (quinone)	pyrD	16.962	23.58	1	6	6	7	0.895156	0.913967	335	35.7991	8.77783
Q5F651	LPS-assembly protein LptD	lptD	125.871	37.7	1	26	26	46	0.895509	0.803926	801	87.4872	7.72314
Q5F525	Aminobenzoate synthetase	NGO_2112	28.1046	16.83	1	7	7	8	0.895653	0.819072	624	68.7638	6.23975
Q5F8G0	UDP-N-acetylmuramate--L-alanyl-gamma-D-glutamyl-meso-2,6-diaminoheptandioate ligase	mpl	2.59013	9.83	1	3	3	5	0.898228	1.02818	458	49.4151	6.7417
Q5F5B5	ABC transporter substrate-binding protein	NGO_2014	57.9295	46.48	1	11	11	30	0.89946	0.808438	284	30.1818	6.15088
Q5FAH2	Carbamoyl-phosphate synthase (glutamine-hydrolyzing)	carB	116.178	30.81	1	29	29	48	0.900087	1.08212	1071	117.411	5.17334
O87407	GTPase Der	der	47.3864	34.02	1	15	15	20	0.900164	0.910868	485	53.9946	9.48096
Q5F710	Protein TonB	NGO_1379	9.61908	10.6	1	2	2	2	0.90037	0.76703	283	28.7318	7.15186
Q5F5A8	Glycerol-3-phosphate dehydrogenase [NAD(P)+]	gpsA	1.9296	5.17	1	2	2	2	0.9006	0.914376	329	35.3455	6.41748
Q5F866	Dihydrolipoamide dehydrogenase	NGO_0925	53.8426	35.97	1	10	10	18	0.90233	0.927205	467	50.8003	6.40479
Q5FAH3	S-adenosylmethionine:tRNA ribosyltransferase-isomerase	queA	6.86019	8.67	1	3	3	3	0.902342	0.904037	346	38.1274	6.41748
Q5F5U3	50S ribosomal protein L18	rplR	42.352	58.97	1	7	7	18	0.902433	0.864368	117	12.7899	10.4185
Q5F8U8	Glutamyl-tRNA(Gln) amidotransferase subunit A	gatA	34.9799	22.87	1	10	10	13	0.903326	0.978969	481	51.2737	5.64307
A0A0H4IT81	Opacity protein opA54	NGO_09965	209.376	53.62	1	3	21	86	0.904019	1.71216	235	26.6903	9.65674
Q5F9P9	Elongation factor 4	lepA	28.6112	19.43	1	11	11	17	0.904872	0.957092	597	65.9605	5.45264
Q5F666	Signal recognition particle protein	ffh	36.0953	28.51	1	12	12	16	0.905326	0.893501	456	49.4692	9.17334
Q5F9F2	L-threonine dehydratase	ilvA	16.5958	17.32	1	8	8	9	0.905352	0.909154	508	54.9983	5.93506
Q5F8G6	Dihydroxy-acid dehydratase	ilvD	39.467	23.59	1	12	12	14	0.905532	0.847147	619	66.7996	6.30322
Q5FA72	Aminopeptidase N	pepN	6.52431	2.08	1	2	2	3	0.90624	0.929615	867	97.4551	5.33838
Q5FA41	30S ribosomal protein S15	rpsO	26.8395	46.07	1	4	4	7	0.906708	1.01014	89	10.3797	11.1802
Q5F4Y8	Glycine--tRNA ligase alpha subunit	glyQ	22.1755	19.46	1	6	6	10	0.906795	0.987274	298	33.975	5.19873
Q5F5R6	DNA-directed RNA polymerase subunit beta'	rpoC	211.319	41.77	1	52	52	89	0.906824	0.800659	1391	153.697	7.25439
Q5F9V2	Uncharacterized protein	NGO_0286	21.1067	19.05	1	6	6	9	0.908016	0.776249	294	33.2686	7.59131
Q5F8T6	3-isopropylmalate dehydrogenase	leuB	85.5268	48.88	1	15	15	29	0.908522	0.916277	356	39.0169	5.0083
Q5F689	Pilus assembly protein PilF	NGO_1673	93.8681	43.73	1	21	21	33	0.909852	0.954319	558	61.8519	5.89697
Q5F584	Glutamine--fructose-6-phosphate aminotransferase [isomerizing]	glmS	24.2911	15.2	1	10	10	11	0.910022	0.97686	612	66.4466	6.56592
Q5F655	Adenylosuccinate lyase	NGO_1711	40.1516	38.82	1	16	16	16	0.912889	0.929132	456	50.3052	5.98584
Q5F696	Enoyl-[acyl-carrier-protein] reductase [NADH]	NGO_1666	9.53358	22.99	1	5	5	5	0.914006	0.851075	261	27.6732	6.13818
Q5F9U3	Translation initiation factor IF-3	infC	7.31695	17.34	1	2	2	2	0.914314	0.936961	173	19.7664	9.31982
Q5F5V1	30S ribosomal protein S4	rpsD	57.5573	40.78	1	11	11	25	0.916642	0.767606	206	23.2355	9.99365
Q5F5N1	Uncharacterized protein	NGO_1889	5.11454	4.73	1	2	2	2	0.916906	0.969679	338	36.8136	4.83057
Q5FAC0	S-adenosylmethionine synthase	metK	26.7205	30.08	1	8	8	11	0.917583	0.978103	389	41.9163	5.18604
Q5F5A9	Phosphoenolpyruvate carboxylase	ppc	10.5079	12.22	1	7	7	10	0.918304	0.859427	900	101.058	7.03467
Q5F8H4	Inosine-5'-monophosphate dehydrogenase	guaB	101.382	43.53	1	16	16	41	0.918811	0.708502	487	52.4064	7.1958
Q5F925	30S ribosomal protein S6	rpsF	28.232	79.51	1	8	8	13	0.918864	0.987341	122	13.8522	7.21045
Q5FA14	UTP--glucose-1-phosphate uridylyltransferase	NGO_0220	20.3818	26.3	1	7	7	10	0.919092	0.900262	289	31.9768	6.44287
Q5F674	Membrane protein	NGO_1688	46.243	27.81	1	13	13	19	0.919141	0.813371	489	56.4637	9.75928
Q5F9L7	Peptidyl-prolyl cis-trans isomerase	NGO_0376	20.9702	64.5	1	9	9	10	0.919321	0.831014	169	18.8684	5.24951
Q5F759	Cytochrome	NGO_1328	35.7707	34.05	1	10	10	18	0.920407	0.871934	279	28.7374	6.30322
Q5F5D9	GTPase Obg	obg	18.4156	15.89	1	5	5	7	0.920885	0.83995	384	41.9725	5.5415
Q5F8D7	Uncharacterized protein	NGO_0845	13.9471	20.74	1	6	6	6	0.921652	1.01356	376	41.9596	4.84326
Q5FAK5	Orotate phosphoribosyltransferase	pyrE	8.30563	12.68	1	2	2	3	0.921939	0.715353	213	23.2532	8.77783
Q5F5H1	Uncharacterized protein	NGO_1955	6.81738	1.66	1	3	3	3	0.923135	1.02632	1389	147.15	9.5249
Q5F7C0	2,3-bisphosphoglycerate-dependent phosphoglycerate mutase	gpmA	11.0065	33.48	1	4	4	6	0.924518	0.789765	227	25.9126	6.55127
Q5F878	Succinate--CoA ligase [ADP-forming] subunit beta	sucC	25.3421	25.52	1	9	9	11	0.925211	1.10415	388	41.2816	5.43994
Q5F8B6	ABC transporter ATP-binding protein	NGO_0870	5.05113	3.62	1	2	2	2	0.926013	0.68925	636	71.6877	5.73193
Q5F9W8	Uncharacterized protein	NGO_0268	6.15381	13.45	1	2	2	2	0.927027	0.96988	119	14.1327	4.24658
Q5F9K8	Delta-aminolevulinic acid dehydratase	NGO_0385	8.67319	12.91	1	3	3	3	0.927136	0.883718	333	36.7545	5.49072
Q5F5U5	50S ribosomal protein L30	rpmD	13.3813	47.54	1	3	3	4	0.927287	0.854778	61	6.93179	9.99365
Q5F543	FetA	NGO_2093	60.3523	29.59	1	19	19	22	0.927577	1.40548	713	78.8162	9.62744
Q5FAG6	Iron-sulfur cluster carrier protein	NGO_0056	16.062	25.91	1	8	8	9	0.928229	0.796496	359	38.114	6.69775
Q5F5L4	Twitching motility protein PilT	NGO_1909	34.164	37.5	1	13	13	16	0.929783	0.739479	408	45.6696	7.34229
Q5F5R5	DNA-directed RNA polymerase subunit beta	rpoB	143.502	33.84	1	38	39	59	0.932143	0.818396	1392	155.652	5.52881
Q5F9L4	Peptidyl-tRNA hydrolase	pth	10.4135	26.04	1	4	4	4	0.933835	0.881649	192	21.4322	9.21729
Q5F807	Protein translocase subunit SecA	secA	46.729	20.96	1	18	18	18	0.934057	0.793981	916	103.139	5.21143
Q5F9G8	Histidine--tRNA ligase	hisS	15.915	12.3	1	5	5	6	0.934365	0.987836	431	48.3113	5.66846
Q5F7U9	Septum formation inhibitor Maf	NGO_1068	31.1988	22.22	1	1	9	12	0.934746	1.37245	468	50.7023	7.1665
Q5F9K6	GTP cyclohydrolase FolE2	folE2	22.7811	23.74	1	6	6	8	0.935144	0.982674	257	28.7286	6.53662
Q5F9T5	Integration host factor subunit alpha	ihfA	3.39589	19	1	2	2	2	0.935461	1.06192	100	11.385	8.99756
Q5F914	ATP-dependent Clp protease proteolytic subunit	clpP	7.67552	10.29	1	2	2	4	0.935874	0.982322	204	22.5916	5.46533
Q5F5G5	Argininosuccinate synthase	argG	64.7561	38.93	1	13	13	25	0.936129	0.993904	447	49.6571	5.30029
Q5F6H3	Septum formation inhibitor Maf	NGO_1585	27.9332	20.83	7	12	12	13	0.936259	0.93015	576	63.1388	8.90967
Q5F9X6	GTPase Era	era	8.52241	9.12	1	3	3	3	0.936625	0.853221	307	34.5163	7.47412
Q5FAI4	Fructose-1,6-bisphosphate aldolase	NGO_0034	72.3211	48.02	1	12	12	22	0.936682	0.999737	354	38.2884	6.02393
Q5F915	Trigger factor	tig	117.891	57.21	1	24	24	48	0.937075	1.06863	437	48.3378	4.90674
Q5F955	tRNA-modifying protein	NGO_0548	10.7056	11.85	1	2	2	3	0.937511	0.961793	287	31.002	6.34131
Q5F9M1	Amino acid ABC transporter substrate-binding protein	NGO_0372	193.641	74.82	1	23	23	71	0.938959	0.765978	274	28.6949	6.60986
Q5F7N6	GTP cyclohydrolase-2	ribA	6.08443	10.15	1	2	2	2	0.939441	0.768318	197	21.8401	5.77002
Q5F5R2	50S ribosomal protein L1	rplA	61.1222	77.06	1	18	18	29	0.939616	0.961962	231	24.107	9.5835
Q5F969	Long-chain fatty acid--CoA ligase	NGO_0530	11.1866	6.38	1	4	4	4	0.941148	0.928372	517	57.4164	9.12939
Q5F678	NADPH-dependent 7-cyano-7-deazaguanine reductase	queF	17.3565	33.12	1	5	5	7	0.941216	1.00279	157	17.9869	6.01123
Q5F939	Pyruvate dehydrogenase E1 component	aceE	286.552	44.53	1	38	38	108	0.941587	0.487339	887	99.5307	5.79541
Q5FAD0	Pilus assembly protein PilO	NGO_0096	33.2412	38.14	1	6	6	14	0.941629	0.640939	215	23.3311	5.13525
Q5F7B9	DNA topoisomerase 4 subunit A	parC	15.3051	9.26	1	5	5	5	0.942896	0.795637	767	84.4045	8.49951
Q5F8P8	Glucose-6-phosphate isomerase 1	pgi1	28.2744	24.09	1	11	11	12	0.94394	0.908699	548	62.0774	6.46826
Q5F5R0	Transcription termination/antitermination protein NusG	nusG	5.38795	16.29	1	2	2	4	0.945527	0.999119	178	20.5376	6.25244
Q5F8H9	Bacterioferritin	NGO_0794	82.755	49.35	1	7	7	30	0.945555	0.859538	154	17.9658	4.81787
Q5F5C7	Cell division protein	NGO_2002	48.269	36.86	1	8	8	16	0.94561	1.01132	274	29.3753	8.32373
Q5F5E7	XRE family transcriptional regulator	NGO_1982	8.76593	40.4	1	4	4	4	0.946069	0.958872	99	11.4292	9.80322
Q5F8Y0	DNA gyrase subunit A	gyrA	74.4356	24.24	1	19	19	26	0.948604	1.08467	916	101.322	5.50342
Q5F950	TonB-dependent receptor	NGO_0553	34.8784	8.79	1	12	12	12	0.948862	0.724939	1206	136.45	8.88037
Q5F746	Phosphoglucosamine mutase	glmM	15.4706	13.71	1	5	5	6	0.949412	1.06902	445	47.9235	5.94775
Q5F8Q2	Glucose-6-phosphate 1-dehydrogenase	zwf	26.7187	18.92	1	8	8	10	0.949523	1.00666	481	53.8556	5.42725
Q5F7X2	Lipoprotein	NGO_1043	35.7066	70.18	1	9	9	12	0.949915	0.587903	114	11.4046	4.67822
Q5F7W9	Chaperone protein ClpB	clpB	125.761	39.35	1	30	30	45	0.951754	0.890387	859	95.039	5.64307
Q5F8H2	Ribonuclease R	rnr	8.97479	5.94	1	4	4	4	0.952484	0.899744	791	88.9963	9.05615
Q5F874	2-oxoglutarate dehydrogenase	sucA	66.2626	18.37	1	16	16	21	0.952563	0.801711	942	105.053	6.771
Q5F542	10 kDa chaperonin	groS	31.298	82.29	1	8	8	13	0.952976	0.885791	96	10.2805	6.12549
Q5FA20	Phosphate acetyltransferase	NGO_0214	74.9187	35.8	1	15	15	28	0.954743	0.899657	500	52.0653	5.12256
Q5F595	DNA ligase	NGO_2034	3.4003	5.84	1	2	2	2	0.955491	1.06864	274	30.7741	10.0522
Q5F942	Dihydrolipoyl dehydrogenase	NGO_0562	67.8767	33.5	1	20	20	25	0.955991	0.541825	594	61.7549	5.30029
Q5F7H2	Phosphatidylserine decarboxylase proenzyme	psd	4.53372	7.34	1	2	2	2	0.956031	0.762453	259	28.2767	8.14795
Q5F6W5	Chaperone protein DnaK	dnaK	407.706	72.59	1	58	58	148	0.95817	0.970744	642	68.8204	4.90674
Q5F7E0	ATP phosphoribosyltransferase	hisG	3.12057	12.67	1	2	2	2	0.958269	0.969125	221	23.7608	7.97217
Q5F8W5	ATP-dependent Clp protease ATP-binding subunit ClpX	clpX	23.1041	16.91	1	7	7	8	0.958822	1.17625	414	44.8044	5.40186
Q5F7V7	Fimb protein	NGO_1060	14.6332	14.94	1	3	3	4	0.959203	0.721579	261	29.1317	8.71924
Q5F7F7	GntR family transcriptional regulator	NGO_1221	4.92957	8.4	1	2	2	3	0.959578	0.766956	238	27.0691	6.7417
Q5F8Q3	Phosphogluconate dehydratase	NGO_0714	34.0228	18.17	1	10	10	13	0.960063	0.889587	611	66.1965	7.02002
Q5F824	Acetate kinase	ackA	36.7433	33.92	1	10	10	16	0.960069	1.03211	398	42.3778	5.88428
Q5F771	Protease	NGO_1314	17.1352	13.97	1	5	5	5	0.961814	0.93691	451	50.7766	6.37939
Q5FA46	Butanediol dehydrogenase	NGO_0186	34.965	23.45	1	8	8	15	0.962418	0.981171	354	37.9088	5.87158
Q5F9P5	Pilus assembly protein	NGO_0348	4.69938	18.97	1	2	2	2	0.963856	0.906671	116	12.7885	5.87158
Q5FAG9	Carbamoyl-phosphate synthase small chain	carA	19.0788	24.4	1	8	8	10	0.964305	0.825505	377	40.5964	5.42725
Q5F5T0	50S ribosomal protein L2	rplB	61.1283	31.77	1	10	10	27	0.964567	0.585061	277	30.098	10.6528
Q5FA09	Septum formation inhibitor Maf	NGO_0225	65.1372	30.1	1	21	21	26	0.965889	1.13373	628	68.7139	9.26123
Q5F8J4	Homoserine dehydrogenase	NGO_0779	38.6367	33.33	1	11	11	17	0.967145	0.80981	435	46.5306	5.5415
Q5F4Z0	ATP synthase subunit beta	atpD	42.2182	42.15	1	14	14	21	0.967191	0.688337	465	50.3918	5.16064
Q5F5D7	Restriction endonuclease HaeII	NGO_1992	0	9.14	1	2	2	2	0.967291	0.607046	350	40.527	5.52881
Q5F564	Glycosyl transferase family 1	NGO_2072	25.8635	24.5	1	8	8	11	0.967718	0.890634	351	39.1442	9.1001
Q5F686	50S ribosomal protein L21	rplU	9.45279	15.69	1	2	2	3	0.969109	0.822322	102	11.4403	10.0522
Q5FA11	Inorganic pyrophosphatase	ppa	6.24833	10.73	1	2	2	2	0.96926	0.910837	177	19.7551	4.91943
Q5F9U4	Threonine--tRNA ligase	thrS	47.4594	19.15	1	14	14	18	0.96935	1.01201	637	72.6797	6.11279
Q5F7W8	Aminotransferase	NGO_1047	23.2581	18.07	1	6	6	11	0.969848	0.846277	404	45.3963	6.99072
Q5FAI2	1-deoxy-D-xylulose-5-phosphate synthase	dxs	2.00054	4.87	1	2	2	2	0.97119	0.856634	637	68.7683	6.26514
Q5F8J8	Lon protease	lon	73.5991	28.54	1	19	19	37	0.97256	0.816964	820	90.7261	7.23975
Q5FA57	30S ribosomal protein S16	rpsP	13.2747	33.33	1	3	3	4	0.97781	1.00891	81	9.31402	10.8872
Q5F4Y0	3-ketoacyl-ACP reductase	fabG	72.7286	63.71	1	12	12	36	0.978973	0.905469	248	26.0184	8.104
Q5F6P1	Pyridoxine 5'-phosphate synthase	pdxJ	17.6676	25.62	1	4	5	6	0.979242	0.857262	242	26.549	5.89697
Q5F6U0	Peptidase M24	NGO_1456	20.9768	13.21	1	8	8	10	0.981385	1.01443	598	64.8931	5.43994
Q5F7L8	ABC transporter substrate-binding protein	NGO_1152	35.5757	33.96	1	8	8	14	0.981541	0.679547	268	28.8405	5.77002
Q5F6V3	Ethanol-active dehydrogenase/acetaldehyde-active reductase	adhP	68.2842	30.64	1	9	9	27	0.981617	0.99191	346	36.3254	5.68115
Q5F5E5	Periplasmic protein	NGO_1984	2.53076	21.3	1	4	4	4	0.982141	1.11181	216	23.26	8.55811
Q5F9F5	Ribose-phosphate pyrophosphokinase	prs	34.5199	27.83	1	7	7	11	0.985848	0.755288	327	35.5476	5.60498
Q5F865	Glutathione peroxidase	NGO_0926	40.3364	39.59	1	10	10	15	0.986548	0.63818	245	26.8622	5.0083
Q5FAJ3	Leucine--tRNA ligase	leuS	39.5976	15.64	1	12	12	15	0.987347	0.999166	876	97.9867	5.43994
Q5F6M3	Cell division protein FtsZ	ftsZ	28.898	28.83	1	9	9	11	0.987558	0.756108	392	41.485	5.021
Q5F805	RNA polymerase sigma factor RpoD	rpoD	22.2014	15.11	1	10	10	11	0.987754	0.871339	642	73.6343	4.99561
Q5F5V3	50S ribosomal protein L17	rplQ	33.9122	56.56	1	7	7	18	0.988223	0.895759	122	13.7666	11.3999
Q5F576	Spore cortex protein	NGO_2054	77.405	58.89	1	7	7	36	0.989705	1.20554	90	10.4791	9.49561
Q5F9I7	Restriction endonuclease	NGO_0407	1.96542	2.03	1	2	2	2	0.990846	0.716321	1032	118.426	6.23975
Q5F8T3	3-isopropylmalate dehydratase small subunit	leuD	19.8206	28.17	1	5	5	6	0.992581	0.757763	213	24.1933	6.40479
Q5F9U0	Phenylalanine--tRNA ligase alpha subunit	pheS	6.50975	7.29	1	2	2	2	0.993254	1.18798	329	37.1978	5.46533
Q5F6R2	Arginine decarboxylase	NGO_1487	9.76569	3.17	1	2	2	3	0.994252	0.826369	630	71.0077	5.80811
Q5F614	Membrane protein	NGO_1752	8.10565	10.56	1	4	4	4	0.994512	0.788485	483	53.4471	8.80713
Q5F527	Ligand-gated channel protein	NGO_2109	14.7157	14.83	1	9	9	9	0.997531	0.969569	809	90.4255	9.49561
Q5F4Z4	ATP synthase subunit b	atpF	35.6895	35.9	1	8	8	11	0.998324	0.578026	156	17.1281	5.71924
Q5F8Z2	Enolase	eno	92.3567	40.89	1	17	17	33	0.999059	0.990083	428	46.083	4.89404
Q5F8J6	Transcriptional regulator HU subunit alpha	NGO_0777	3.98598	44.94	1	3	3	3	0.999652	1.13571	89	9.37101	9.40771
Q5F8M9	Protein RecA	recA	33.6872	32.76	1	9	9	15	0.999695	0.678929	348	37.6193	5.19873
Q5FAG7	Pilus assembly protein	NGO_0055	602.203	57.87	2	69	69	236	1.00062	1.2338	1004	110.223	9.17334
Q5FA34	Phosphoenolpyruvate synthase	NGO_0200	61.2376	23.43	1	16	16	24	1.00151	0.944964	794	87.181	5.14795
Q5F7Y2	Fumarate hydratase class II	fumC	11.8058	5.63	1	2	2	5	1.00277	0.893743	462	49.2511	6.29053
Q5F693	Type II secretion system protein F	NGO_1669	15.4402	11.95	1	6	6	6	1.00454	0.614675	410	45.3029	9.48096
Q5F8F5	Acetyl-coenzyme A carboxylase carboxyl transferase subunit alpha	accA	31.4195	34.48	1	9	9	11	1.00526	0.849769	319	35.3983	6.96143
Q5F7X8	Transglycosylase	NGO_1033	3.06316	20.77	1	4	4	4	1.00553	0.977327	207	23.3603	10.4185
Q5F6Q5	Putrescine-binding periplasmic protein	NGO_1494	105.333	51.58	1	21	22	39	1.00607	0.708089	380	41.2313	5.96045
Q5F9Y5	Acetyl-coenzyme A carboxylase carboxyl transferase subunit beta	accD	14.532	15.86	1	4	4	7	1.00729	0.757746	290	31.7544	8.68994
Q5F856	Elongation factor P	efp	8.82419	15.05	1	3	3	3	1.00959	0.891965	186	20.8663	4.86865
Q5F8S1	Threonine synthase	NGO_0689	8.63228	12.58	1	4	4	4	1.01073	0.885188	469	51.4459	5.66846
Q5FA15	Argininosuccinate lyase	argH	22.1409	27.51	1	8	8	13	1.01135	0.768969	458	51.2771	5.74463
Q5F870	Succinate dehydrogenase flavoprotein subunit	NGO_0921	11.5691	8.86	1	4	4	4	1.01249	0.930448	587	64.4083	6.23975
Q5F4Z2	ATP synthase subunit alpha	atpA	70.3333	41.36	1	20	20	31	1.01623	0.772791	515	55.2067	5.57959
Q5F8H8	Bacterioferritin	NGO_0795	18.4954	50.96	1	6	6	13	1.01766	0.8652	157	18.0044	4.70361
Q5FAD4	3-dehydroquinate synthase	aroB	7.15304	17.27	1	4	4	4	1.01791	0.82141	359	38.556	6.58057
Q5F8K6	Peptidylprolyl isomerase	NGO_0766	38.1951	25.59	1	12	12	16	1.01823	1.1135	512	56.6792	6.16357
Q5F6L1	Cytochrome C biogenesis protein CcmE	NGO_1540	2.40068	2.74	1	2	2	2	1.0203	0.961037	548	61.1234	9.11475
Q5FAG1	Formate--tetrahydrofolate ligase	fhs	26.6349	21.15	1	9	9	11	1.02254	1.06884	558	59.1027	6.59521
Q5FA17	Iron ABC transporter substrate-binding protein	NGO_0217	444.121	64.35	1	29	29	179	1.02412	1.23007	331	35.8181	9.59814
Q5FA80	RNA helicase	NGO_0149	2.85134	10.94	1	3	3	5	1.0256	0.950201	457	50.8415	9.17334
Q5F6M2	Cell division protein FtsA	ftsA	6.30751	4.11	1	2	2	2	1.02765	0.696953	414	44.0271	5.51611
Q5F751	Lactate dehydrogenase	NGO_1336	42.1626	33.73	1	9	10	15	1.02777	1.02106	332	36.6104	5.85889
Q5F943	Uncharacterized protein	NGO_0561	23.174	20.16	1	9	9	9	1.03027	0.950477	516	57.0555	5.78271
Q5F9K2	Uncharacterized protein	NGO_0391	9.69361	12.23	1	2	2	2	1.03159	0.859099	188	20.1227	5.16064
A0A0H4IT57	Membrane protein	NGO_08475	6.42813	7.96	1	2	2	2	1.03719	0.988786	377	43.0584	5.66846
Q5F7T9	CMP-N-acetylneuraminate-beta-galactosamide-alpha-2, 3-sialyltransferase	NGO_1081	47.2201	50.53	1	16	16	34	1.0375	0.726611	378	43.3773	8.98291
Q5F9J0	ADP-L-glycero-D-manno-heptose-6-epimerase	hldD	26.6956	29.34	1	9	9	10	1.03802	0.855861	334	38.3491	6.16357
Q5FA44	Preprotein translocase subunit YajC	NGO_0188	8.30245	37.5	1	3	3	3	1.03825	0.629485	88	9.67428	9.81787
Q5F9R9	Ubiquinone/menaquinone biosynthesis C-methyltransferase UbiE	ubiE	5.56515	10.2	1	2	2	2	1.04241	0.787773	245	27.383	7.72314
Q5F6X5	Na(+)-translocating NADH-quinone reductase subunit F	nqrF	4.28136	7.65	1	2	2	2	1.04403	0.779642	405	45.1436	5.22412
Q5F6Q4	Ligand-gated channel	NGO_1495	344.64	60.09	1	63	63	140	1.04635	0.82311	912	101.882	9.36377
Q5F9L1	ATP-dependent zinc metalloprotease FtsH	ftsH	7.83308	5.95	1	2	2	2	1.05053	0.680278	655	72.0705	5.40186
Q5FA40	Polyamine-transporting ATPase	NGO_0192	12.949	7.22	1	3	3	5	1.05201	0.665536	374	42.1335	5.60498
Q5FA43	Protein translocase subunit SecD	secD	0	4.38	1	3	3	3	1.05238	0.518813	617	66.7041	6.18896
Q5F9W2	Peptidase	NGO_0275	127.604	20.03	1	26	27	51	1.05719	0.836416	1593	175.807	9.27588
Q5F7G5	Long-chain fatty acid--CoA ligase	NGO_1213	3.20195	6.29	1	2	2	2	1.05807	1.01208	556	61.3904	8.57275
Q5F4W6	Membrane protein insertase YidC	yidC	5.40484	3.85	1	2	2	2	1.05828	0.799067	545	60.5022	8.646
A0A0H4IW93	Sulfatase	NGO_06735	9.80531	9.75	1	3	3	3	1.06006	0.800595	472	53.2499	7.07861
Q5F7C5	Putrescine-binding periplasmic protein	NGO_1253	24.9845	20.21	1	5	7	10	1.06117	0.688683	381	42.5165	6.59521
Q5F9Q7	Polyribonucleotide nucleotidyltransferase	pnp	122.202	46.25	1	28	28	51	1.06413	0.734247	707	76.4069	5.45264
Q5FAE0	Glycosyl transferase family 1	NGO_0086	5.70131	5.15	1	2	2	2	1.06422	1.08265	388	44.1127	8.41162
Q5F5T5	50S ribosomal protein L29	rpmC	2.12355	31.75	1	2	2	2	1.0653	1.09496	63	7.07394	10.0815
Q5F4Z3	ATP synthase subunit delta	atpH	10.6278	23.73	1	4	4	4	1.06637	0.696484	177	19.4854	5.09717
Q5F940	Acetyltransferase component of pyruvate dehydrogenase complex	NGO_0564	81.9985	25.33	1	15	15	33	1.07006	0.374073	529	54.6588	5.37646
Q5F501	Lipoprotein	NGO_2139	120.329	68.4	1	20	20	48	1.07046	0.653132	288	31.318	5.43994
Q5F714	Peptidase	NGO_1375	4.70174	2.41	1	2	2	2	1.07107	0.920904	582	66.1124	6.06201
Q5F9Z8	Cell division protein ZipA	NGO_0236	9.24637	8.64	1	3	3	4	1.07326	0.725825	428	46.973	6.39209
Q5F875	Dihydrolipoyllysine-residue succinyltransferase component of 2-oxoglutarate dehydrogenase complex	NGO_0916	32.8368	32.57	1	10	10	15	1.07878	0.633078	393	41.6591	5.26221
Q5F604	Acyl carrier protein	acpP	18.0205	39.74	1	3	3	6	1.0823	1.05043	78	8.5201	4.01807
Q5F716	Cbb3-type cytochrome c oxidase subunit II	NGO_1373	20.6239	30.54	1	4	4	9	1.08306	0.710068	203	22.5148	8.38232
Q5F9U1	50S ribosomal protein L20	rplT	67.7847	50.42	1	10	10	29	1.08339	1.04046	119	13.6716	11.6343
Q5F6Q7	Phospholipase A1	NGO_1492	113.86	52.53	1	19	19	40	1.08399	1.00405	375	42.0761	8.98291
Q5F9S2	DNA repair protein RecN	NGO_0318	3.0175	5.21	1	2	2	2	1.08659	0.790597	557	61.0943	5.32568
Q5FAC9	Pilus assembly protein PilP	NGO_0097	6.04368	31.16	1	5	5	6	1.09174	0.770682	199	22.2417	9.15869
Q5F665	Membrane protein	NGO_1701	18.0477	26.49	1	2	2	5	1.09656	0.773415	151	15.9694	7.23975
Q5F9N3	Uroporphyrin-III methyltransferase	NGO_0360	13.2788	10.59	1	5	5	5	1.10011	0.783654	444	48.326	5.23682
Q5F526	Uncharacterized protein	NGO_2111	30.2264	22.49	1	10	10	10	1.10379	1.07962	507	55.4663	9.62744
Q5F6L8	UDP-N-acetylglucosamine--N-acetylmuramyl-(pentapeptide) pyrophosphoryl-undecaprenol N-acetylglucosamine transferase	murG	4.87144	6.2	1	2	2	2	1.10938	0.922104	355	38.2584	9.14404
Q5F809	Membrane protein	NGO_0994	56.1284	43.72	1	9	9	27	1.11167	0.675602	183	18.5201	4.80518
Q5F6T1	Bifunctional purine biosynthesis protein PurH	purH	23.7694	16.16	1	6	6	8	1.1142	1.11281	526	56.6529	6.26514
Q5F5H0	Membrane protein	NGO_1956	59.6207	33.06	1	20	20	28	1.11451	0.907608	608	66.8251	7.73779
Q5F541	60 kDa chaperonin	groL	809.928	75.92	1	44	44	381	1.1158	0.5937	544	57.3148	5.03369
Q5F5Y7	4-hydroxy-tetrahydrodipicolinate reductase	dapB	15.8881	16.73	1	3	3	5	1.12295	0.900905	269	28.2516	6.37939
Q5F8Q9	3,4-dihydroxy-2-butanone 4-phosphate synthase	NGO_0704	7.34494	5.17	1	2	2	2	1.12876	0.875539	445	48.3939	6.66846
Q5F849	4-hydroxy-tetrahydrodipicolinate synthase	dapA	24.7302	30.93	1	5	5	9	1.13569	0.924226	291	30.7318	5.94775
Q5F7H3	Ligand-gated channel	NGO_1205	77.2473	32.72	1	18	18	27	1.14427	0.821491	758	84.8769	8.83643
Q5FA91	Protease Do	NGO_0138	10.4069	9.02	1	3	3	4	1.14962	1.09922	499	52.5351	5.46533
Q5F932	Peptidase S41	NGO_0572	322.417	76.17	1	46	46	128	1.14982	1.13005	491	52.7028	8.82178
Q5FA49	Sec-independent protein translocase protein TatA	tatA	6.25904	31.34	1	2	2	3	1.15587	0.777956	67	7.39994	6.78564
Q5FA28	Putrescine-binding periplasmic protein	NGO_0206	54.0881	35.98	1	12	13	22	1.15721	0.797248	378	41.1558	5.87158
Q5F9H9	Poly(A) polymerase I	pcnB	14.3251	13.05	1	4	4	5	1.16215	0.829533	452	51.3748	9.80322
Q5F9Q0	Signal peptidase I	NGO_0343	15.6406	20.35	1	5	5	8	1.16485	0.757339	339	37.5489	6.25244
Q5F8X1	Lactate dehydrogenase	lldD	21.7073	26.92	1	9	9	10	1.17192	0.585368	390	43.369	7.10791
Q5F945	Uncharacterized protein	NGO_0558	12.1082	30.65	1	4	4	4	1.17456	1.12389	186	20.2483	8.67529
Q5F9X1	Cell division protein FtsN	NGO_0265	22.3805	27.46	1	10	10	12	1.18533	1.25089	346	36.9842	9.11475
Q5F9M3	RecBCD enzyme subunit RecB	recB	0	3.83	1	2	2	3	1.19574	1.01172	1200	134.185	5.84619
Q5F649	DSBA oxidoreductase	NGO_1717	42.5259	31.2	1	10	10	16	1.19891	0.675296	234	25.404	5.87158
Q5F539	Uncharacterized protein	NGO_2097	9.55085	25	1	2	2	4	1.20471	1.18128	140	15.15	9.99365
Q5F8L5	Periplasmic protein	NGO_0757	8.18243	20.83	1	2	2	4	1.20966	1.29249	144	16.6043	9.1001
Q5F5V9	Uncharacterized protein	NGO_1810	6.35183	12.34	1	2	2	2	1.21187	1.28807	154	17.0406	5.92236
Q5F887	Uncharacterized protein	NGO_0902	28.441	24.57	1	10	10	13	1.23689	1.1096	525	59.208	8.96826
Q5F8T2	Uncharacterized protein	NGO_0678	150.031	69.05	1	10	10	56	1.24001	1.10253	84	8.77855	9.43701
A0A0H4IV74	Opacity protein opA54	NGO_05420	395.816	83.19	1	4	33	209	1.24441	4.48194	226	25.5668	9.29053
Q5F6P7	N-acetylmuramoyl-L-alanine amidase	amiC	164.114	60.82	1	22	22	57	1.24908	1.07817	416	45.1047	10.0815
Q5F933	Uncharacterized protein	NGO_0571	409.207	56.19	1	54	54	150	1.25798	1.27265	598	65.9031	10.0229
Q5F9R4	D-alanyl-D-alanine endopeptidase	NGO_0327	7.66317	19.87	1	5	5	5	1.25985	0.938702	312	34.1306	9.48096
Q5F763	GDSL family lipase	NGO_1323	8.73201	12.21	1	3	3	3	1.26117	0.920986	213	22.9492	9.46631
Q5F6F3	Lipopolysaccharide export system protein LptA	lptA	20.8402	36.93	1	5	5	11	1.26199	1.04045	176	18.3326	10.0522
Q5F5F7	Septum formation inhibitor Maf	NGO_1971	49.8294	30.92	2	5	13	19	1.26704	1.21175	498	53.894	8.104
Q5F5K1	Thioredoxin	NGO_1923	4.81101	21.88	1	3	3	3	1.27131	0.910821	160	17.599	9.5835
Q5F5W8	Outer membrane protein assembly factor BamA	bamA	598.179	66.92	1	60	60	264	1.27343	1.07685	792	87.8876	8.92432
Q5F9J4	Protease HtpX homolog	htpX	12.9124	16.49	1	4	4	4	1.27439	0.540749	279	30.1529	7.63525
Q5F725	Acriflavine resistance protein B	NGO_1364	2.12045	1.22	1	2	2	2	1.27477	0.778965	1067	113.924	7.62061
Q5F845	TonB-dependent receptor	NGO_0952	161.996	47.51	1	40	40	67	1.27524	1.09829	922	104.1	9.36377
Q5F5W7	Membrane protein	NGO_1802	130.578	46.39	1	15	15	48	1.28856	1.09117	166	19.0769	8.38232
Q5F5P9	Uncharacterized protein	NGO_1868	14.635	25.13	1	4	4	5	1.29137	1.0793	199	21.8987	9.70068
A0A0H4IWD4	Opacity protein opA54	NGO_07725	386.273	52.74	1	6	20	178	1.29536	1.09558	237	27.1817	9.86182
Q5F6H4	Adhesin MafA 2/3	mafA2	123.859	65.81	1	19	21	49	1.29821	1.19777	313	33.9054	9.0415
Q5F621	NADH-quinone oxidoreductase	NGO_1745	5.16198	3.32	1	2	2	3	1.29915	0.812178	753	81.3406	6.12549
Q5F9F3	Cytochrome C550	NGO_0443	9.04737	8.23	1	3	3	5	1.30128	1.00394	389	42.6746	9.72998
Q5FAC7	Penicillin-binding protein 1A	mrcA	75.0881	36.72	1	22	22	32	1.30418	1.10601	798	88.4396	9.46631
Q5F6R5	L,D-transpeptidase catalytic domain protein	NGO_1484	51.4764	36.05	1	14	14	19	1.30809	1.33585	344	36.7888	7.84033
Q5F6K3	Thiol:disulfide interchange protein	NGO_1548	30.6843	34.58	1	6	6	14	1.30855	1.90024	214	23.9878	9.42236
Q5F9W0	Outer membrane protein assembly factor BamD	bamD	356.813	73.78	1	23	23	156	1.31523	1.10849	267	30.8196	8.86572
Q5F8I5	Stomatin 2	NGO_0788	9.565	8.25	1	2	2	3	1.32078	0.683995	315	34.4562	5.79541
Q5F6K2	Cell division protein FtsN	NGO_1549	38.4712	30.45	1	8	8	12	1.33125	0.999899	289	31.5235	9.1001
Q5F7F3	Peptidyl-prolyl cis-trans isomerase	NGO_1225	143.52	67.28	1	23	23	54	1.33538	0.688407	272	28.9038	5.85889
Q5F5G8	Membrane protein	NGO_1958	53.6999	28.67	1	11	11	17	1.33652	0.938578	429	44.6165	5.04639
Q5F7U0	Cytochrome C	NGO_1080	40.6672	46.05	1	6	6	19	1.34458	0.987093	152	16.0819	7.82568
Q5F8M3	Tetratricopeptide repeat family protein	NGO_0747	12.0987	20.25	1	4	4	4	1.35878	1.5526	237	26.1465	9.49561
Q5FA63	ABC transporter substrate-binding protein	NGO_0168	69.0721	48.7	1	14	14	27	1.36549	1.36776	308	33.7072	7.62061
Q5F9F7	Outer-membrane lipoprotein LolB	NGO_0439	41.0134	47.67	1	8	8	16	1.36565	1.14272	193	21.1747	6.31592
Q5F5Y8	Outer membrane protein assembly factor BamE	bamE	138.873	75.2	1	10	10	66	1.36908	1.14825	125	13.9444	9.14404
Q5FAB9	Peptidase S13	NGO_0107	17.9037	14.29	1	6	6	7	1.37353	1.2234	469	50.4882	9.15869
Q5FA29	Outer-membrane lipoprotein carrier protein	lolA	14.3048	44.93	1	7	7	8	1.38955	0.988934	207	22.2984	9.48096
Q5F765	Uncharacterized protein	NGO_1321	28.2363	24.42	1	4	4	9	1.39569	1.17641	172	18.7884	5.2749
Q5F9Y4	Clp protease ClpB	NGO_0250	51.5256	36.95	1	8	8	22	1.40561	1.09729	203	22.5365	8.38232
Q5F724	Multidrug transporter	NGO_1365	15.7782	24.51	1	7	7	10	1.41263	0.766499	412	42.7313	8.71924
A0A0H4J5J1	Uncharacterized protein	NGO_04530	44.6959	24.55	1	5	5	18	1.42579	1.1988	110	11.7102	9.99365
Q5F581	Murein transglycosylase	NGO_2048	90.03	48.07	1	16	16	44	1.42797	1.23672	441	47.9866	9.74463
Q5F7J8	Pilin	NGO_1177	5.5366	17.45	1	2	2	2	1.44167	0.78983	149	16.8239	9.29053
Q5F7G3	Uncharacterized protein	NGO_1215	10.8842	25.48	1	3	3	6	1.44318	1.71225	157	16.9627	9.33447
Q5F848	Uncharacterized protein	NGO_0948	610.016	74.93	1	41	41	261	1.44512	1.07643	375	41.3116	8.86572
Q5F5V7	Membrane protein	NGO_1812	2419.18	80.75	1	35	35	1367	1.45392	0.577345	348	37.1645	8.76318
Q5F6J5	Membrane protein	NGO_1559	59.0456	24.44	1	4	4	15	1.47632	1.35402	225	23.3967	9.17334
Q5F8E4	Membrane protein	NGO_0834	73.1824	59.19	1	13	13	31	1.48545	1.23207	223	23.6971	8.41162
Q5F9E2	Type IV pilin	NGO_0456	8.70281	26.54	1	4	4	7	1.48647	0.942776	162	18.0712	9.30518
Q5F652	Peptidylprolyl isomerase	NGO_1714	218.549	62.35	1	23	23	92	1.49226	1.15084	332	35.7828	9.18799
Q5F5P1	Aspartate carbamoyltransferase regulatory chain	pyrI	2.50296	18.42	1	2	2	3	1.49323	0.683782	152	16.9048	8.92432
Q5F9I1	Membrane protein	NGO_0413	24.1933	38.4	1	9	9	10	1.5118	1.31811	237	26.0635	9.01221
Q5F8C4	Uncharacterized protein	NGO_0861	140.05	52.44	1	6	6	48	1.51973	1.168	82	9.50597	9.81787
Q5F9V6	LPS-assembly lipoprotein LptE	lptE	57.809	57.86	1	10	10	28	1.53285	1.11873	159	17.6402	5.35107
Q5F7W6	Phosphoribosylglycinamide formyltransferase	NGO_1049	12.6065	27.61	1	5	5	6	1.54193	1.25683	268	30.1152	8.33838
Q5FAC5	Cytochrome C	NGO_0101	13.9641	17.39	1	4	4	8	1.54503	1.4977	207	22.0031	9.15869
Q5F574	ABC transporter substrate-binding protein	NGO_2056	88.8356	30.03	1	10	10	31	1.55156	1.94727	333	36.3012	9.72998
Q5FA01	Membrane protein	NGO_0233	28.1847	37.71	1	8	8	10	1.56188	0.961475	175	18.4666	9.77393
Q5F7A6	Uncharacterized protein	NGO_1274	57.8514	37.15	1	13	13	20	1.56346	1.18847	393	42.2346	8.76318
Q5F5E8	Uncharacterized protein	NGO_1981	44.2054	29.57	1	9	9	19	1.56704	1.84006	186	20.3433	9.5249
Q5F901	Murein transglycosylase	NGO_0608	7.91758	7.29	1	4	4	4	1.57065	1.32246	658	72.0444	9.36377
Q5F6A5	Peptidylprolyl isomerase	NGO_1655	62.2374	71.43	1	16	16	24	1.57334	1.297	252	28.5519	8.70459
Q5F9E6	Ferrous iron transporter B	NGO_0452	10.7629	11.31	1	2	2	4	1.58262	1.34899	221	24.6714	8.55811
Q5F6V7	Thiol:disulfide interchange protein	NGO_1438	149.811	41.76	1	14	14	62	1.59823	1.29996	261	28.6878	8.27979
Q5F8S0	Lipoprotein	NGO_0690	19.652	22.13	1	3	3	7	1.59851	1.18215	122	13.0224	8.07471
Q5F912	Pilus assembly protein PilW	NGO_0595	153.114	57.71	1	16	16	64	1.61283	1.21042	253	28.4335	8.95361
Q5F930	Carbonate dehydratase	NGO_0574	155.925	58.73	1	10	10	67	1.61354	1.49102	252	28.0673	9.12939
Q5F9H8	Periplasmic protein	NGO_0416	48.6297	36.45	1	6	6	15	1.62477	1.4823	107	11.8038	8.00146
Q5F7C7	Prokaryotic membrane lipolipid attachment site family protein	NGO_1251	64.3301	57.58	1	9	9	30	1.63337	1.31462	165	18.6006	9.53955
Q5F7V4	Membrane-bound lysozyme-inhibitor of c-type lysozyme family protein	NGO_1063	91.7191	42.06	1	5	5	42	1.63844	1.18434	126	13.4755	6.53662
Q5F726	Multidrug transporter	NGO_1363	237.921	62.74	1	28	28	88	1.64373	1.13248	467	50.3824	9.17334
Q5F5F6	Adhesin MafA 1/4	mafA1	77.005	41.88	1	14	16	28	1.65361	1.41329	320	34.7295	7.60596
Q5F8Y3	Murein transglycosylase	NGO_0626	128.465	58.95	1	22	22	47	1.65664	1.24748	363	39.7961	8.26514
Q5F9E4	Pilus assembly protein PilW	NGO_0454	14.8384	17.79	1	5	5	5	1.66192	1.39315	326	35.9266	9.23193
Q5F9M4	Phage-shock protein	NGO_0369	20.2975	42.86	1	4	4	8	1.67336	1.48423	119	12.9767	8.70459
Q5F571	Trifunctional thioredoxin/methionine sulfoxide reductase A/B protein	NGO_2059	75.9315	36.78	1	22	22	30	1.68975	1.20356	522	58.0211	7.48877
Q5F9E3	Pilus assembly protein PilX	NGO_0455	30.5125	13.79	1	4	4	9	1.71198	1.03679	203	21.9531	8.11865
Q5F9N5	Chitinase	NGO_0358	4.29849	14.29	1	2	2	2	1.71295	1.75269	140	15.7008	9.43701
Q5F6A4	Peptidylprolyl isomerase	NGO_1656	354.818	82.29	1	35	35	132	1.73043	1.53131	288	31.5087	9.12939
Q5F9H4	Uncharacterized protein	NGO_0420	248.791	56.97	1	20	20	105	1.73852	1.22355	244	27.1858	9.18799
Q5F967	GDSL-like lipase/acylhydrolase family protein	NGO_0532	16.0813	12.59	1	4	4	8	1.76262	1.47001	397	42.5644	8.39697
Q5FAD2	Type IV pilus biogenesis and competence protein PilQ	pilQ	923.157	75.93	1	55	55	457	1.77693	1.31958	723	77.9032	9.34912
Q5F9M5	Uncharacterized protein	NGO_0368	42.6461	76.98	1	10	10	16	1.78699	1.69145	126	13.7583	9.0415
Q5F6V5	ABC transporter substrate-binding protein	NGO_1440	16.0664	9.18	1	3	3	5	1.80361	0.875214	392	41.7006	8.47021
Q5F7F5	Membrane protein	NGO_1223	9.39431	12.56	1	3	3	3	1.81399	1.64316	223	24.0876	9.70068
Q5F6I1	Membrane protein	NGO_1577	844.41	36.44	1	15	15	546	1.81939	1.29274	236	25.5241	8.646
Q5F5H6	Esterase	NGO_1949	88.9777	48.33	1	12	12	33	1.82031	1.58011	300	31.3349	9.96436
Q5F520	Transporter	NGO_2119	54.6344	45.41	1	9	9	20	1.83453	1.91556	196	21.0402	9.89111
Q5F537	Prokaryotic lipo-attachment site family protein	NGO_2099	5.64727	51.79	1	2	2	2	1.89322	0.958584	56	5.8861	9.5542
Q5F5P4	Peptidoglycan-binding protein LysM	NGO_1873	461.437	81.33	1	37	37	239	1.89766	1.44675	407	45.4194	7.04932
Q5F8J0	Uncharacterized protein	NGO_0783	48.5904	55.88	1	10	10	30	1.90105	1.91332	170	18.4598	9.94971
Q5F505	Lytic murein transglycosylase	NGO_2135	152.845	49.35	1	22	22	55	1.90515	1.45842	616	67.4891	9.18799
Q5FAF4	Opacity protein opA54	NGO_0070	806.049	81.06	1	12	39	427	1.914	0.857171	227	25.6769	9.5249
Q5F5E4	Hemolysin	NGO_1985	169.077	75.74	1	13	13	74	1.92271	1.46428	202	21.7145	9.80322
Q5F5I3	Uncharacterized protein	NGO_1942	53.4858	26.71	1	9	9	22	1.94274	1.30424	146	16.6286	9.36377
Q5F7W0	Peptidase	NGO_1056	170.872	60.83	1	16	16	64	1.96874	1.49083	337	34.4686	9.45166
A0A0H4IVN2	Uncharacterized protein	NGO_11165	50.9226	54.26	4	6	9	18	2.13041	2.44513	129	13.861	8.70459
Q5F823	Thiol:disulfide interchange protein DsbD	dsbD	69.2297	23.79	1	11	11	31	2.14397	1.88276	601	64.8997	6.80029
Q5F5M0	DNA-binding competence protein 2	NGO_1304	27.1744	45.36	2	5	5	8	2.32088	2.17962	97	10.0605	9.67139
Q5F9W6	Uncharacterized protein	NGO_0270	7.16338	23.18	1	4	4	7	2.41585	1.8524	151	17.3995	8.22119
Q5F9Z1	Uncharacterized protein	NGO_0243	18.8488	31.64	1	5	5	11	2.53963	1.7298	177	19.6973	7.95752
Q5FAD1	Pilin assembly protein	NGO_0095	65.6805	29.83	1	7	7	20	2.60392	2.09463	181	20.0821	5.09717
A0A0H4J5N9	Opacity protein opA54	NGO_06725	451.616	78.21	1	5	29	246	2.825	0.707004	234	26.5292	9.72998
Q5F8F9	Uncharacterized protein	NGO_0816	23.2959	33.66	1	4	4	6	3.31785	3.11153	101	10.8073	8.48486
A0A0H4ITA9	Uncharacterized protein	NGO_11125	36.8623	35.87	3	2	5	15	3.46747	6.77122	92	9.98505	9.1001
A0A0H4IS55	Opacity protein opA54	NGO_04980	586.402	82.76	1	23	35	327	4.38213	5.17334	232	26.1771	9.70068
A0A0H4IVG5	Uncharacterized protein	NGO_07995	14.599	42.19	1	4	5	5	4.95647	8.18581	128	13.6408	8.74854
A0A0H4IWJ8	Uncharacterized protein	NGO_11150	57.2948	30.53	3	2	5	18	5.27221	5.46851	95	10.1813	9.37842
A0A0H4IWJ0	Uncharacterized protein	NGO_10985	202.588	59.57	3	8	11	73	7.26602	6.94927	141	14.9736	9.14404
A0A0H4ITB4	Large pilS cassette	NGO_11155	87.5976	30.36	4	4	9	48	14.6546	1.2744	247	26.9377	9.59814
